# Supplementary material for: Humanismo cristiano y cuestión antropológica
Source: Royal Society of Chemistry journal article supplement (doi:10.1039/c6ob02707e), 2007-01-01
Supplement: c6ob02707e1.pdf [file c6ob02707e1.pdf]

# Synthesis of 8-azaprotosappanin A derivatives via intramolecular palladium-catalyzed ortho C–H activation/C–C cyclization **and antibacterial activity**

Xuan Zhou, Wanyong Fu, Hongshuo Jiang, Chenglong Wang, Chao Ju, Wenyi Chu\*, ZhiZhong Sun\*

*School of Chemistry and Materials Science, Heilongjiang University, Harbin 150080, P. R. China*

\*Corresponding author. Tel.: +86-451-86609135; fax: +86-451-86609135; e-mail: [wenyichu@hlju.edu.cn](mailto:wenyichu@hlju.edu.cn)

## Supplementary data

### Table of Contents

|                                                                                                                       |     |
|-----------------------------------------------------------------------------------------------------------------------|-----|
| 1. General methods and materials.....                                                                                 | S2  |
| 2. General procedures for the synthesis of 2-iodophenols.....                                                         | S2  |
| 3. Synthesis and characterization of $\alpha$ -(2-Iodophenoxy)-N-phenylacetamide derivatives (1).....                 | S4  |
| 4. Synthesis and characterization of 8-azaprotosappanin A derivatives (2).....                                        | S10 |
| 5. Synthesis and characterization of 8-azaprotosappanin A.....                                                        | S17 |
| 6. Antibacterial studies.....                                                                                         | S17 |
| 7. Characterization of 2-iodophenols.....                                                                             | S18 |
| 8. $^1\text{H}$ and $^{13}\text{C}$ NMR spectra for $\alpha$ -(2-Iodophenoxy)-N-phenylacetamide derivatives (1) ..... | S20 |
| 9. $^1\text{H}$ and $^{13}\text{C}$ NMR spectra for 8-azaprotosappanin A and derivatives (2).....                     | S45 |
| 10. HPLC spectra for 8-azaprotosappanin A and derivatives (2).....                                                    | S71 |

## 1. General methods and materials

Unless otherwise noted, all commercial materials and solvents were used without further purification. Data for  $^1\text{H}$  NMR are reported as follows: chemical shift ( $\delta$  ppm), multiplicity, integration, and coupling constant (Hz). Data for  $^{13}\text{C}$  NMR are reported in terms of chemical shift ( $\delta$  ppm). The following abbreviations were used to describe peak splitting patterns when appropriate: s = singlet, d = doublet, t = triplet, m = multiplet. High-resolution mass spectra (HRMS) was carried out by LC/MSD TOF using a column of C18 (rapid resolution, 3.5  $\mu\text{m}$ , 2.1 mm  $\times$  30 mm) at a flow of 0.40 mL/min. IR spectra were obtained as potassium bromide pellets or as liquid films between two potassium bromide pellets with a Bruker Vector 22 spectrometer. TLC was performed using commercially prepared 100-400 mesh silica gel plates (GF254), and visualization was effected at 254 nm. All the other chemicals were purchased from Energy Chemical. Commercial reagents were used without further purification. High performance liquid chromatography (HPLC) was carried out by Shimadzu LC-20A using a column of C18 (dianonsil 5 $\mu$  250 $\times$ 4.6mm), at a flow (80:20  $\text{CH}_3\text{OH}/3\%$  aqueous acetic acid) of 1.0 mL/min and at  $\lambda = 254$  nm.

## 2. General procedures for the synthesis of 2-iodophenols

**For the 2-iodophenol**, phenol (20 g, 212.51 mmol) and iodine (26.97 g, 106.26 mmol) in distilled water (600 ml) was added hydrogen peroxide 8 mL of a 30% (m/v) aqueous solution, (212.51 mmol). The mixture was stirred at room temperature or at 50  $^\circ\text{C}$  for 24 h. Then, 10% (m/v) sodium thiosulfate aqueous solution (350 ml) was added to the mixture, which was extracted with ethyl acetate (3 $\times$ 500 mL). The organic phase was dried over  $\text{Na}_2\text{SO}_4$ . After filtration, the solvent was evaporated under reduced pressure. The residue was purified by column chromatography on silica gel using a mixture of cyclohexane/dichloromethane (1/1), affording 23.5 g of 2-iodophenol as white solid (50%). Mp. 37.9 – 39.3  $^\circ\text{C}$ .

**For the 2-iodo-4-methoxyphenol**, 4-methoxyphenol (25 g, 201.4 mmol) was dissolved in 420ml of methanol. Potassium iodide (33.4 g, 201.4 mmol) and sodium hydroxide (8.1 g, 201.4 mmol) were added, and the solution was cooled to 0  $^\circ\text{C}$ . Aqueous sodium hypochlorite (260 mL, 5.2%  $\text{NaOCl}$ ) was added dropwise over 3 h at 0–3  $^\circ\text{C}$ . The resulting slurry was stirred for 8 h at 0–2  $^\circ\text{C}$  and treated with 82 mL of 10% aqueous  $\text{Na}_2\text{S}_2\text{O}_3$ . The mixture was neutralized using 5% aqueous HCl. Then ether (300 mL) was added. The organic layer was washed with brine (300 mL) and dried over  $\text{Na}_2\text{SO}_4$ . After filtration and rotary evaporation, 42.8 g of 2-iodo-4-methoxyphenol was

afforded, as a white solid, yield 85%.  $^1\text{H NMR}$  (400 MHz,  $\text{CDCl}_3$ )  $\delta$  = 7.01 (d,  $J$  = 2.9 Hz, 1H), 6.94 (d,  $J$  = 8.9 Hz, 1H), 6.80 (dd,  $J$  = 8.9, 2.9 Hz, 1H), 5.17 (s, 1H), 3.75 (s, 3H).

**For the 2-iodo-4-methyl-phenol**, 2-methylphenol (25 ml, 235.3 mmol) was dissolved in 450 ml of methanol. Potassium iodide (39.1 g, 235.3 mmol) and sodium hydroxide (9.41 g, 235.3 mmol) were added, and the solution was cooled to 0 °C. Aqueous sodium hypochlorite (290 mL, 5.2% NaOCl) was added dropwise over 3 h at 0–3 °C. The resulting slurry was stirred for 8 h at 0–2 °C and treated with 95 mL of 10% aqueous  $\text{Na}_2\text{S}_2\text{O}_3$ . The mixture was neutralized using 5% aqueous HCl. Then ether (350 mL) was added. The organic layer was washed with brine (350 mL) and dried over  $\text{Na}_2\text{SO}_4$ . After filtration and rotary evaporation, 49.5 g of 2-iodo-4-methyl-phenol was afforded, as a colorless liquid, yield 90%.  $^1\text{H NMR}$  (400 MHz, DMSO)  $\delta$  = 10.00 (s, 1H), 7.49 (d,  $J$  = 1.6 Hz, 1H), 6.98 (dd,  $J$  = 8.2, 1.6 Hz, 1H), 6.82 (d,  $J$  = 8.2 Hz, 1H), 2.17 (s, 3H).

**For the 2-iodo-4-fluoro-phenol**, 4-fluorophenol (25 g, 223 mmol) was dissolved in 430 ml of methanol. Potassium iodide (37 g, 223 mmol) and sodium hydroxide (8.92 g, 223 mmol) were added, and the solution was cooled to 0 °C. Aqueous sodium hypochlorite (275 mL, 5.2% NaOCl) was added dropwise over 3 h at 0–3 °C. The resulting slurry was stirred for 8 h at 0–2 °C and treated with 90 mL of 10% aqueous  $\text{Na}_2\text{S}_2\text{O}_3$ . The mixture was neutralized using 5% aqueous HCl. Then ether (325 mL) was added. The organic layer was washed with brine (325 mL) and dried over  $\text{Na}_2\text{SO}_4$ . After filtration and rotary evaporation, 43.2 g of 2-iodo-4-fluoro-phenol was afforded, as a light yellow solid, yield 81%.  $^1\text{H NMR}$  (400 MHz,  $\text{CDCl}_3$ )  $\delta$  = 7.37 (dd,  $J$  = 7.6, 2.8 Hz, 1H), 7.01 – 6.91 (m, 2H), 5.11 (s, 1H).

**For the 2-iodo-5-methoxy-phenol**,  $\text{I}_2$  (40.9 g, 161.1 mmol, 1 eq) was dissolved in  $\text{CHCl}_3$  (850 mL) with stirring over 1.5 h. A 2 L round-bottomed flask was charged with 3-methoxyphenol (20.00 g, 161.1 mmol, 1 eq) and  $\text{AgCO}_2\text{CF}_3$  (35.6 g, 40 mmol, 1 eq). The solution was added slowly into the round-bottomed flask over 3 h. The reaction was stirred at room temperature for 24 h. The mixture was filtered over celatom and the precipitate washed with  $\text{CHCl}_3$ . The organics were washed with 5% aqueous  $\text{Na}_2\text{S}_2\text{O}_3$  (500ml), saturated  $\text{NaHCO}_3$ , washed with water, washed with brine, dried over  $\text{Na}_2\text{SO}_4$ , filtered, and concentrated under reduced pressure. The residue was purified via flash chromatography using  $\text{CH}_2\text{Cl}_2$  to give 31.76 g of 2-iodo-5-methoxy-phenol as a white solid (79%).  $^1\text{H NMR}$  (400 MHz,  $\text{CDCl}_3$ )  $\delta$  = 7.49 (d,  $J$  = 8.8 Hz, 1H), 6.59 (d,  $J$  = 2.8 Hz, 1H), 6.33 (dd,  $J$  = 8.8, 2.8 Hz, 1H), 5.24 (s, 1H), 3.77 (s, 3H).

### 3. Synthesis and characterization of $\alpha$ -(2-iodophenoxy)-N-phenylacetamide derivatives (1).

**General Procedure A:** The first stage of one-pot continuous reaction was to add anilines (1.0eq), anhydrous potassium carbonate (1.2eq) and appropriate amount of anhydrous DMAC (0.2 M to substrate) in a two necked flask and keep hypothermia with a rapid infusion of chloroacetyl chloride (1.02eq) into the mixture in ice bath 1 h to room temperature 20 min. After the completion of the first stage, anhydrous potassium carbonate (1.2eq) was added into the reactor and the reaction system temperature was raised up to 80 °C in water bath under nitrogen atmosphere. Then add the iodo-phenols (1.1eq) into the reactor and keep the reaction system under the adjusted conditions for 2 h. When the reaction was over, the reaction mixture was filtered and removed solvent by rotary evaporation. And the crude product was precipitated after cold 15% aqueous NaOH was added. At last, the crude product was recrystallized with alcohol to get the solid pure product. And the characterization of compounds **1** was showed as follows:

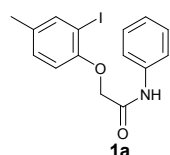

Following the general procedure A. White solid (93%). Mp. 126 – 130 °C.  $^1\text{H NMR}$  (400 MHz,  $\text{CDCl}_3$ )  $\delta$  = 8.74 (s, 1H), 7.63 (d,  $J$  = 6.3 Hz, 2H), 7.39 (d,  $J$  = 21.1 Hz, 3H), 7.21 – 7.05 (m, 2H), 6.81 (d,  $J$  = 7.3 Hz, 1H), 4.61 (s, 2H), 2.30 (s, 3H).  $^{13}\text{C NMR}$  (100 MHz,  $\text{CDCl}_3$ )  $\delta$  = 165.55, 151.31,

137.06, 133.81, 133.50, 129.40, 129.12, 124.78, 119.84, 113.78, 86.26, 68.40, 20.31. HRMS (EI) calcd for  $\text{C}_{15}\text{H}_{14}\text{INO}_2$  ( $\text{M}^+$ ): 367.0069. Found: 367.0118. Anal.calcd for  $\text{C}_{15}\text{H}_{14}\text{INO}_2$ : C, 49.07; H, 3.84; I, 34.56; N, 3.81. Found: C, 49.04; H, 3.72; I, 34.59; N, 3.80. IR (KBr disc):  $\nu$  = 3365, 2917, 1685, 1542, 1288  $\text{cm}^{-1}$ .

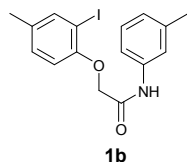

Following the general procedure A. Light yellow solid (95%). Mp. 115 – 117 °C.  $^1\text{H NMR}$  (400 MHz,  $\text{CDCl}_3$ )  $\delta$  = 8.76 (s, 1H), 7.64 (s, 1H), 7.56 – 7.35 (m, 2H), 7.14 (d,  $J$  = 8.1 Hz, 1H), 6.97 (d,  $J$  = 7.7 Hz, 1H), 6.72 (d,  $J$  = 8.2 Hz, 1H), 4.60 (s, 2H), 2.33 (d,  $J$  = 32.0 Hz, 6H).  $^{13}\text{C NMR}$  (100

MHz,  $\text{CDCl}_3$ )  $\delta$  = 165.30, 153.45, 139.72, 139.09, 137.05, 133.86, 130.42, 128.92, 125.60, 120.45, 116.98, 112.31, 86.27, 68.23, 21.55, 20.08. HRMS (EI) calcd for  $\text{C}_{16}\text{H}_{16}\text{INO}_2$  ( $\text{M}^+$ ): 381.0226. Found: 381.0179. Anal.calcd for  $\text{C}_{16}\text{H}_{16}\text{INO}_2$ : C, 50.41; H, 4.23; I, 33.29; N, 3.67. Found: C, 50.39; H, 4.20; I, 33.32; N, 3.68. IR (KBr disc):  $\nu$  = 3379, 2913, 1683, 1548, 1241  $\text{cm}^{-1}$ .

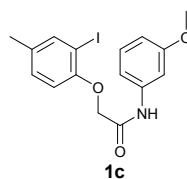

Following the general procedure A. White solid (97%). Mp. 128 – 131 °C.  $^1\text{H NMR}$  (400 MHz,  $\text{CDCl}_3$ )  $\delta$  = 8.82 (s, 1H), 7.64 (s, 1H), 7.42 (s, 1H), 7.24 (s, 1H), 7.15 (d,  $J$  = 7.5 Hz, 2H), 6.72 (d,  $J$  = 8.2 Hz, 2H), 4.60 (s, 2H), 3.83 (s, 3H), 2.29 (s, 3H).  $^{13}\text{C NMR}$  (100 MHz,  $\text{CDCl}_3$ )  $\delta$  = 165.33,

160.20, 153.41, 139.73, 138.35, 133.90, 130.42, 129.81, 112.32, 112.06, 110.40, 105.70, 86.26, 68.22, 55.37, 20.08. HRMS (EI) calcd for  $\text{C}_{16}\text{H}_{16}\text{INO}_3$  ( $\text{M}^+$ ): 397.0175. Found: 397.0196. Anal.calcd for  $\text{C}_{16}\text{H}_{16}\text{INO}_3$ : C, 48.38; H,

4.06; I, 31.95; N, 3.53. Found: C, 48.39; H, 4.05; I, 31.92; N, 3.55. IR (KBr disc):  $\nu = 3373, 2909, 1692, 1556, 1288$   $\text{cm}^{-1}$ .

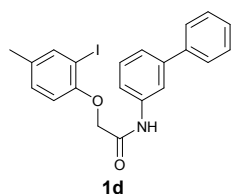

Following the general procedure A. Gray solid (93%). Mp. 149 – 153 °C.  $^1\text{H}$  NMR (400 MHz,  $\text{CDCl}_3$ )  $\delta = 8.81$  (s, 1H), 7.87 (t,  $J = 2.0$  Hz, 1H), 7.62 (tt,  $J = 6.2, 1.2$  Hz, 3H), 7.49 – 7.41 (m, 4H), 7.41 – 7.34 (m, 2H), 7.12 (ddd,  $J = 8.3, 2.2, 0.9$  Hz, 1H), 6.84 (d,  $J = 8.3$  Hz, 1H), 4.65 (s, 2H), 2.31 (s, 3H).  $^{13}\text{C}$  NMR (100 MHz,  $\text{CDCl}_3$ )  $\delta = 165.65, 151.33, 142.34,$

140.63, 137.48, 133.83, 133.57, 129.49, 129.49, 129.42, 128.78, 127.56, 127.25, 123.66, 118.76, 118.62, 113.86, 86.27, 68.50, 20.30. HRMS (EI) calcd for  $\text{C}_{21}\text{H}_{18}\text{INO}_2$  (M+): 443.0382. Found: 443.0401. Anal. calcd for  $\text{C}_{21}\text{H}_{18}\text{INO}_2$ : C, 56.90; H, 4.09; I, 28.63; N, 3.16. Found: C, 56.92; H, 4.11; I, 28.60; N, 3.15. IR (KBr disc):  $\nu = 3394, 2924, 1689, 1540, 1256$   $\text{cm}^{-1}$ .

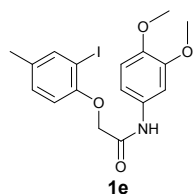

Following the general procedure A. Gray solid (98%). Mp. 152 – 153 °C.  $^1\text{H}$  NMR (400 MHz,  $\text{CDCl}_3$ )  $\delta = 8.73$  (s, 1H), 7.64 (d,  $J = 2.0$  Hz, 1H), 7.49 (d,  $J = 2.4$  Hz, 1H), 7.15 (dd,  $J = 8.3, 2.1$  Hz, 1H), 7.02 (dd,  $J = 8.6, 2.5$  Hz, 1H), 6.85 (d,  $J = 8.7$  Hz, 1H), 6.73 (d,  $J = 8.3$  Hz, 1H), 4.60 (s, 2H), 3.90 (d,  $J = 13.9$  Hz, 6H), 2.30 (s, 3H).  $^{13}\text{C}$  NMR (100 MHz,  $\text{CDCl}_3$ )  $\delta = 165.14, 153.48,$

149.16, 146.20, 139.72, 133.92, 130.79, 130.45, 112.41, 111.85, 111.37, 104.73, 86.25, 68.28, 56.14, 56.01, 20.08. HRMS (EI) calcd for  $\text{C}_{17}\text{H}_{18}\text{INO}_4$  (M+): 427.0281. Found: 427.0243. Anal. calcd for  $\text{C}_{17}\text{H}_{18}\text{INO}_4$ : C, 47.79; H, 4.25; I, 29.70; N, 3.28. Found: C, 47.81; H, 4.26; I, 29.67; N, 3.29. IR (KBr disc):  $\nu = 3378, 2967, 1678, 1556, 1288$   $\text{cm}^{-1}$ .

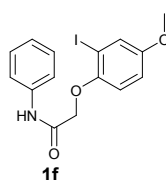

Following the general procedure A. White solid (95%). Mp. 105 – 107 °C.  $^1\text{H}$  NMR (400 MHz,  $\text{CDCl}_3$ )  $\delta = 8.72$  (s, 1H), 7.63 (d,  $J = 8.0$  Hz, 2H), 7.36 (t,  $J = 7.7$  Hz, 2H), 7.22 – 7.09 (m, 2H), 6.93 – 6.78 (m, 2H), 4.59 (s, 2H), 3.78 (s, 3H).  $^{13}\text{C}$  NMR (100 MHz,  $\text{CDCl}_3$ )  $\delta = 165.66, 155.31, 147.79,$

137.06, 129.11, 124.77, 119.84, 118.95, 115.13, 114.09, 86.01, 69.14, 55.93. HRMS (EI) calcd for  $\text{C}_{15}\text{H}_{14}\text{INO}_3$  (M+): 383.0018. Found: 383.0065. Anal. calcd for  $\text{C}_{15}\text{H}_{14}\text{INO}_3$ : C, 47.02; H, 3.68; I, 33.12; N, 3.66. Found: C, 46.99; H, 3.69; I, 33.14; N, 3.64. IR (KBr disc):  $\nu = 3391, 2945, 1684, 1543, 1284$   $\text{cm}^{-1}$ .

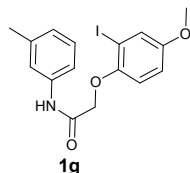

Following the general procedure A. White solid (97%). Mp. 123 – 125 °C.  $^1\text{H}$  NMR (400 MHz,  $\text{CDCl}_3$ )  $\delta = 8.67$  (s, 1H), 7.47 (s, 1H), 7.41 (d,  $J = 8.1$  Hz, 1H), 7.26 – 7.22 (m, 1H), 7.16 (d,  $J = 2.5$  Hz, 1H), 6.97 (d,  $J = 7.5$  Hz, 1H), 6.91 – 6.82 (m, 2H), 4.58 (s, 2H), 3.78 (s, 3H), 2.37 (s,

3H).  $^{13}\text{C}$  NMR (100 MHz,  $\text{CDCl}_3$ )  $\delta = 165.60, 155.32, 147.83, 139.08, 136.95, 128.92, 125.60, 120.47, 118.98, 116.99, 115.14, 114.09, 86.93, 69.18, 55.93, 21.51$ . HRMS (EI) calcd for  $\text{C}_{16}\text{H}_{16}\text{INO}_3$  (M+): 397.0175. Found: 397.0196. Anal. calcd for  $\text{C}_{16}\text{H}_{16}\text{INO}_3$ : C, 48.38; H, 4.06; I, 31.95; N, 3.53. Found: C, 48.37; H, 4.07; I, 31.98; N, 3.49. IR (KBr disc):  $\nu = 3384, 2920, 1692, 1545, 1298$   $\text{cm}^{-1}$ .

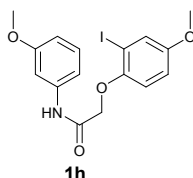

Following the general procedure A. Light yellow solid (98%). Mp. 92 – 94 °C. <sup>1</sup>H NMR (400 MHz, CDCl<sub>3</sub>) δ = 8.72 (s, 1H), 7.39 (s, 1H), 7.26 (t, *J* = 8.1 Hz, 1H), 7.16 (d, *J* = 2.5 Hz, 1H), 7.10 (d, *J* = 8.7 Hz, 1H), 6.91 – 6.82 (m, 2H), 6.71 (dd, *J* = 8.2, 2.1 Hz, 1H), 4.58 (s, 2H), 3.83 (s, 3H), 3.78 (s, 3H). <sup>13</sup>C NMR (100 MHz, CDCl<sub>3</sub>) δ = 165.65, 160.22, 155.35, 147.80, 138.25, 129.80, 118.97, 115.18, 114.11, 112.75, 112.06, 110.46, 85.40, 69.19, 55.93, 55.36. HRMS (EI) calcd for C<sub>16</sub>H<sub>16</sub>INO<sub>4</sub> (M<sup>+</sup>): 413.0124. Found: 413.0066. Anal.calcd for C<sub>16</sub>H<sub>16</sub>INO<sub>4</sub>: C, 46.51; H, 3.90; I, 30.71; N, 3.39. Found: C, 46.54; H, 3.91; I, 30.69; N, 3.38. IR (KBr disc): ν = 385, 2938, 1682, 1540, 1277 cm<sup>-1</sup>.

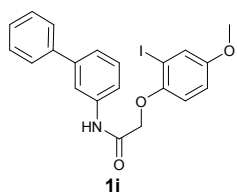

Following the general procedure A. Gray solid (94%). Mp. 138 – 140 °C. <sup>1</sup>H NMR (400 MHz, CDCl<sub>3</sub>) δ = 8.80 (s, 1H), 7.86 (s, 1H), 7.62 (t, *J* = 6.9 Hz, 3H), 7.49 – 7.41 (m, 3H), 7.37 (dd, *J* = 14.2, 6.9 Hz, 2H), 7.17 (d, *J* = 2.7 Hz, 1H), 6.93 – 6.83 (m, 2H), 4.62 (s, 2H), 3.78 (s, 3H). <sup>13</sup>C NMR (100 MHz, CDCl<sub>3</sub>) δ = 165.76, 155.37, 147.83, 142.33, 140.62, 137.49, 129.49, 128.78, 127.56, 127.24, 123.64, 118.99, 118.76, 118.62, 115.24, 114.14, 87.63, 69.26, 55.94. HRMS (EI) calcd for C<sub>21</sub>H<sub>18</sub>INO<sub>3</sub> (M<sup>+</sup>): 459.0031. Found: 459.0107. Anal.calcd for C<sub>21</sub>H<sub>18</sub>INO<sub>3</sub>: C, 54.92; H, 3.95; I, 27.63; N, 3.05. Found: C, 54.90; H, 3.97; I, 27.66; N, 3.03. IR (KBr disc): ν = 3391, 2944, 1687, 1538, 1270 cm<sup>-1</sup>.

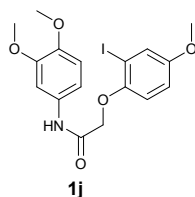

Following the general procedure A. Gray solid (99%). Mp. 114 – 118 °C. <sup>1</sup>H NMR (400 MHz, CDCl<sub>3</sub>) δ = 7.45 (d, *J* = 2.0 Hz, 1H), 7.16 (d, *J* = 2.5 Hz, 1H), 7.00 (d, *J* = 2.1 Hz, 1H), 6.87 (dt, *J* = 12.6, 8.8 Hz, 3H), 4.58 (s, 2H), 3.91 (s, 3H), 3.88 (s, 3H), 3.78 (s, 3H). <sup>13</sup>C NMR (100 MHz, CDCl<sub>3</sub>) δ = 165.46, 155.35, 149.17, 147.85, 146.23, 130.68, 118.96, 115.30, 114.12, 112.76, 111.92, 111.40, 86.77, 69.26, 56.14, 56.00, 55.93. HRMS (EI) calcd for C<sub>17</sub>H<sub>18</sub>INO<sub>5</sub> (M<sup>+</sup>): 443.0230. Found: 443.0266. Anal.calcd for C<sub>17</sub>H<sub>18</sub>INO<sub>5</sub>: C, 46.07; H, 4.09; I, 28.63; N, 3.16. Found: C, 46.05; H, 4.10; I, 28.62; N, 3.15. IR (KBr disc): ν = 3400, 2942, 1682, 1536, 1295 cm<sup>-1</sup>.

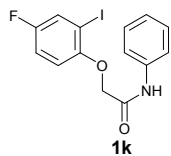

Following the general procedure A. White solid (93%). Mp. 121 – 124 °C. <sup>1</sup>H NMR (400 MHz, CDCl<sub>3</sub>) δ = 8.76 (s, 1H), 7.66 (d, *J* = 7.7 Hz, 2H), 7.56 (d, *J* = 4.9 Hz, 1H), 7.37 (t, *J* = 7.4 Hz, 2H), 7.17 (t, *J* = 7.1 Hz, 1H), 7.10 (t, *J* = 6.8 Hz, 1H), 6.78 (dd, *J* = 8.6, 4.0 Hz, 1H), 4.60 (s, 2H). <sup>13</sup>C NMR (100 MHz, CDCl<sub>3</sub>) δ = 164.91, 157.62 (d, *J* = 220 Hz), 152.16, 137.02, 129.16, 126.27 (d, *J* = 30 Hz), 124.89, 119.85, 116.30 (d, *J* = 20 Hz), 112.83 (d, *J* = 10 Hz), 86.0 (d, *J* = 10 Hz), 68.68. HRMS (EI) calcd for C<sub>14</sub>H<sub>11</sub>FINO<sub>2</sub> (M<sup>+</sup>): 370.9818. Found: 370.9792. Anal.calcd for C<sub>14</sub>H<sub>11</sub>FINO<sub>2</sub>: C, 45.31; H, 2.99; F, 5.12; I, 34.19; N, 3.77. Found: C, 45.33; H, 2.97; F, 5.14; I, 34.18; N, 3.76. IR (KBr disc): ν = 3388, 2924, 1694, 1535, 1290 cm<sup>-1</sup>.

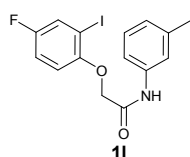

Following the general procedure A. Light yellow solid (95%). Mp. 117 – 120 °C. <sup>1</sup>H NMR (400

MHz, CDCl<sub>3</sub>)  $\delta$  = 8.60 (s, 1H), 7.46 (s, 1H), 7.43 – 7.31 (m, 2H), 7.25 (t,  $J$  = 7.6 Hz, 1H), 7.10 – 7.01 (m, 1H), 6.98 (d,  $J$  = 7.3 Hz, 1H), 6.89 (dd,  $J$  = 8.8, 4.5 Hz, 1H), 4.60 (s, 2H), 2.37 (s, 3H). <sup>13</sup>C NMR (100 MHz, CDCl<sub>3</sub>)  $\delta$  = 165.06, 157.53 (d,  $J$  = 244 Hz), 150.09, 139.14, 136.82, 128.97, 125.74, 120.70 (d,  $J$  = 26 Hz), 120.48, 117.01, 115.38 (d,  $J$  = 23 Hz), 114.51 (d,  $J$  = 9 Hz), 86.14 (d,  $J$  = 8 Hz), 68.81, 21.52. HRMS (EI) calcd for C<sub>15</sub>H<sub>13</sub>FINO<sub>2</sub> (M<sup>+</sup>): 384.9975. Found: 384.9914. Anal. calcd for C<sub>15</sub>H<sub>13</sub>FINO<sub>2</sub>: C, 46.77; H, 3.40; F, 4.93; I, 32.95; N, 3.64. Found: C, 46.75; H, 3.43; F, 4.94; I, 32.96; N, 3.63. IR (KBr disc):  $\nu$  = 3385, 2928, 1703, 1546, 1273 cm<sup>-1</sup>.

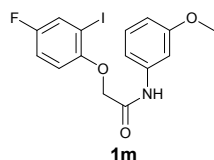

Following the general procedure A. White solid (96%). Mp. 120 – 123 °C. <sup>1</sup>H NMR (400 MHz, CDCl<sub>3</sub>)  $\delta$  = 8.74 (s, 1H), 7.55 (dd,  $J$  = 7.4, 3.0 Hz, 1H), 7.41 (t,  $J$  = 2.1 Hz, 1H), 7.16 – 7.05 (m, 2H), 6.78 (dd,  $J$  = 9.0, 4.4 Hz, 1H), 6.72 (ddd,  $J$  = 8.3, 2.5, 0.9 Hz, 1H), 4.59 (s, 2H), 3.83 (s, 3H). <sup>13</sup>C NMR (100 MHz, CDCl<sub>3</sub>)  $\delta$  = 164.90, 160.23, 157.62 (d,  $J$  = 245 Hz), 152.14 (d,  $J$  = 3 Hz), 138.21, 129.85, 126.27 (d,  $J$  = 25 Hz), 116.29 (d,  $J$  = 12 Hz), 112.82 (d,  $J$  = 8 Hz), 112.78, 112.06, 110.44, 105.79, 85.96 (d,  $J$  = 8 Hz), 68.67, 55.38. HRMS (EI) calcd for C<sub>15</sub>H<sub>13</sub>FINO<sub>3</sub> (M<sup>+</sup>): 400.9924. Found: 400.9962. Anal. calcd for C<sub>15</sub>H<sub>13</sub>FINO<sub>3</sub>: C, 44.91; H, 3.27; F, 4.74; I, 31.63; N, 3.49. Found: C, 44.94; H, 3.26; F, 4.72; I, 31.58; N, 3.48. IR (KBr disc):  $\nu$  = 3380, 3913, 1685, 1550, 1285 cm<sup>-1</sup>.

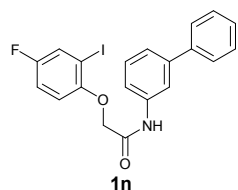

Following the general procedure A. Yellow solid (91%). Mp. 138 – 141 °C. <sup>1</sup>H NMR (400 MHz, CDCl<sub>3</sub>)  $\delta$  = 8.73 (s, 1H), 7.86 (s, 1H), 7.61 (d,  $J$  = 7.4 Hz, 3H), 7.49 – 7.42 (m, 3H), 7.41 – 7.34 (m, 3H), 7.10 – 7.01 (m, 1H), 6.91 (dd,  $J$  = 9.0, 4.6 Hz, 1H), 4.64 (s, 2H). <sup>13</sup>C NMR (100 MHz, CDCl<sub>3</sub>)  $\delta$  = 165.21, 157.59 (d,  $J$  = 244 Hz), 150.11, 142.40, 140.57, 137.35, 129.53, 128.80, 127.61, 127.24, 123.79, 120.73 (d,  $J$  = 26 Hz), 118.78, 118.66, 115.42 (d,  $J$  = 23 Hz), 114.64 (d,  $J$  = 8 Hz), 85.53 (d,  $J$  = 13 Hz), 68.91. HRMS (EI) calcd for C<sub>20</sub>H<sub>15</sub>FINO<sub>2</sub> (M<sup>+</sup>): 447.0131. Found: 447.0095. Anal. calcd for C<sub>20</sub>H<sub>15</sub>FINO<sub>2</sub>: C, 53.71; H, 3.38; F, 4.25; I, 28.37; N, 3.13. Found: C, 53.68; H, 3.40; F, 4.24; I, 28.39; N, 3.42. IR (KBr disc):  $\nu$  = 3381, 2934, 1698, 1542, 1293 cm<sup>-1</sup>.

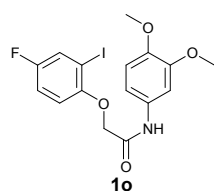

Following the general procedure A. Gray solid (97%). Mp. 133 – 135 °C. <sup>1</sup>H NMR (400 MHz, CDCl<sub>3</sub>)  $\delta$  = 8.56 (s, 1H), 7.44 (d,  $J$  = 2.2 Hz, 1H), 7.37 (dd,  $J$  = 7.6, 2.9 Hz, 1H), 7.06 (td,  $J$  = 8.4, 7.9, 2.9 Hz, 1H), 6.97 (dd,  $J$  = 8.6, 2.3 Hz, 1H), 6.91 (dd,  $J$  = 9.0, 4.6 Hz, 1H), 6.84 (d,  $J$  = 8.6 Hz, 1H), 4.61 (s, 2H), 3.91 (s, 3H), 3.88 (s, 3H). <sup>13</sup>C NMR (100 MHz, CDCl<sub>3</sub>)  $\delta$  = 164.92, 158.54 (d,  $J$  = 244 Hz), 150.09, 149.17, 146.31, 130.50, 120.63 (d,  $J$  = 26 Hz), 115.42 (d,  $J$  = 23 Hz), 114.65 (d,  $J$  = 8 Hz), 111.95, 111.34, 104.78, 87.84 (d,  $J$  = 11 Hz), 68.87, 56.12, 56.01. HRMS (EI) calcd for C<sub>16</sub>H<sub>15</sub>FINO<sub>4</sub> (M<sup>+</sup>): 431.0030. Found: 431.0078. Anal. calcd for C<sub>16</sub>H<sub>15</sub>FINO<sub>4</sub>: C, 44.47; H, 3.51; F, 4.41; I, 29.43; N, 3.25. Found: C, 44.49; H, 3.52; F, 4.41; I, 29.46; N, 3.23. IR (KBr disc):  $\nu$  = 3396, 2935, 1684, 1542, 1295 cm<sup>-1</sup>.

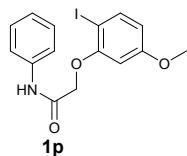

Following the general procedure A. White solid (94%). Mp. 163 – 166 °C.  $^1\text{H}$  NMR (400 MHz,  $\text{CDCl}_3$ )  $\delta$  = 8.83 (s, 1H), 7.72 – 7.63 (m, 3H), 7.40 – 7.34 (m, 2H), 7.16 (ddt,  $J$  = 8.6, 7.3, 1.2 Hz, 1H), 6.43 (d,  $J$  = 7.6 Hz, 2H), 4.60 (s, 2H), 3.81 (s, 3H).  $^{13}\text{C}$  NMR (100 MHz,  $\text{CDCl}_3$ )  $\delta$  = 165.03, 161.50, 156.08, 139.14, 137.13, 129.14, 124.80, 119.82, 108.86, 100.54, 74.94, 67.89, 55.67. HRMS (EI) calcd for  $\text{C}_{15}\text{H}_{14}\text{INO}_3$  (M<sup>+</sup>): 383.0018. Found: 383.0086. Anal. calcd for  $\text{C}_{15}\text{H}_{14}\text{INO}_3$ : C, 47.02; H, 3.68; I, 33.12; N, 3.66. Found: C, 46.99; H, 3.68; I, 33.14; N, 3.63. IR (KBr disc):  $\nu$  = 3386, 2972, 1700, 1540, 1284  $\text{cm}^{-1}$ .

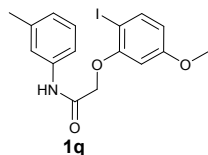

Following the general procedure A. White solid (96%). Mp. 164 – 165 °C.  $^1\text{H}$  NMR (400 MHz,  $\text{CDCl}_3$ )  $\delta$  = 8.76 (s, 1H), 7.65 (d,  $J$  = 8.5 Hz, 1H), 7.51 (s, 1H), 7.44 (d,  $J$  = 7.7 Hz, 1H), 7.24 (t,  $J$  = 7.7 Hz, 1H), 6.97 (d,  $J$  = 7.5 Hz, 1H), 6.43 (d,  $J$  = 7.5 Hz, 2H), 4.59 (s, 2H), 3.80 (s, 3H), 2.37 (s, 3H).  $^{13}\text{C}$  NMR (100 MHz,  $\text{CDCl}_3$ )  $\delta$  = 164.98, 161.58, 156.10, 139.13, 139.10, 137.03, 128.93, 125.63, 120.44, 116.98, 108.87, 100.52, 74.95, 67.91, 55.66, 21.56. HRMS (EI) calcd for  $\text{C}_{16}\text{H}_{16}\text{INO}_3$  (M<sup>+</sup>): 397.0175. Found: 397.0205. Anal. calcd for  $\text{C}_{16}\text{H}_{16}\text{INO}_3$ : C, 48.38; H, 4.06; I, 31.95; N, 3.53. Found: C, 48.36; H, 4.07; I, 31.98; N, 3.51. IR (KBr disc):  $\nu$  = 3375, 2917, 1688, 1550, 1318  $\text{cm}^{-1}$ .

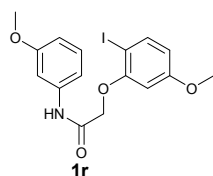

Following the general procedure A. White solid (98%). Mp. 133 – 135 °C.  $^1\text{H}$  NMR (400 MHz,  $\text{CDCl}_3$ )  $\delta$  = 8.82 (s, 1H), 7.65 (d,  $J$  = 8.3 Hz, 1H), 7.42 (t,  $J$  = 2.2 Hz, 1H), 7.30 – 7.22 (m, 1H), 7.15 (dt,  $J$  = 8.0, 1.4 Hz, 1H), 6.71 (dd,  $J$  = 8.4, 2.5 Hz, 1H), 6.43 (d,  $J$  = 8.2 Hz, 2H), 4.59 (s, 2H), 3.83 (s, 3H), 3.80 (s, 3H).  $^{13}\text{C}$  NMR (100 MHz,  $\text{CDCl}_3$ )  $\delta$  = 165.02, 161.58, 160.20, 156.05, 139.14, 138.32, 129.82, 112.06, 110.40, 108.87, 105.71, 100.55, 74.94, 67.89, 55.66, 55.37. HRMS (EI) calcd for  $\text{C}_{16}\text{H}_{16}\text{INO}_4$  (M<sup>+</sup>): 413.0124. Found: 413.0102. Anal. calcd for  $\text{C}_{16}\text{H}_{16}\text{INO}_4$ : C, 46.51; H, 3.90; I, 30.71; N, 3.39. Found: C, 46.53; H, 3.91; I, 30.72; N, 3.40. IR (KBr disc):  $\nu$  = 3387, 2938, 1701, 1541, 1306  $\text{cm}^{-1}$ .

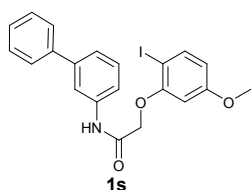

Following the general procedure A. Light yellow solid (93%). Mp. 156 – 158 °C.  $^1\text{H}$  NMR (400 MHz,  $\text{CDCl}_3$ )  $\delta$  = 8.90 (s, 1H), 7.92 (t,  $J$  = 2.0 Hz, 1H), 7.69 – 7.63 (m, 2H), 7.63 – 7.58 (m, 2H), 7.45 (ddd,  $J$  = 10.5, 6.2, 2.6 Hz, 3H), 7.41 – 7.34 (m, 2H), 6.44 (dq,  $J$  = 4.8, 2.6 Hz, 2H), 4.63 (s, 2H), 3.81 (s, 3H).  $^{13}\text{C}$  NMR (100 MHz,  $\text{CDCl}_3$ )  $\delta$  = 165.13, 161.60, 156.10, 142.34, 140.64, 139.16, 137.56, 129.50, 128.80, 127.57, 127.25, 123.69, 118.75, 118.60, 108.92, 100.60, 74.97, 67.97, 55.67. HRMS (EI) calcd for  $\text{C}_{21}\text{H}_{18}\text{INO}_3$  (M<sup>+</sup>): 459.0031. Found: 459.0012. Anal. calcd for  $\text{C}_{21}\text{H}_{18}\text{INO}_3$ : C, 54.92; H, 3.95; I, 27.63; N, 3.05. Found: C, 54.95; H, 3.96; I, 27.63; N, 3.04. IR (KBr disc):  $\nu$  = 3391, 2910, 1704, 1543, 1307  $\text{cm}^{-1}$ .

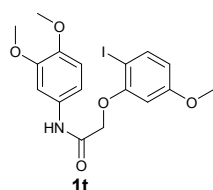

Following the general procedure A. Yellow solid (99%). Mp. 154 – 157 °C.  $^1\text{H}$  NMR (400 MHz,  $\text{CDCl}_3$ )  $\delta$  = 8.73 (s, 1H), 7.70 – 7.62 (m, 1H), 7.49 (d,  $J$  = 2.4 Hz, 1H), 7.02 (dd,  $J$  = 8.6,



2.5 Hz, 1H), 6.84 (d,  $J = 8.7$  Hz, 1H), 6.48 – 6.39 (m, 2H), 4.59 (s, 2H), 3.91 (s, 3H), 3.87 (s, 3H), 3.81 (s, 3H).  $^{13}\text{C}$  NMR (100 MHz,  $\text{CDCl}_3$ )  $\delta = 164.80, 161.59, 156.11, 149.14, 146.20, 139.13, 130.76, 111.83, 111.36, 108.88, 104.69, 100.61, 74.91, 67.94, 56.13, 56.00, 55.66$ . HRMS (EI) calcd for  $\text{C}_{17}\text{H}_{18}\text{INO}_5$  ( $\text{M}^+$ ): 443.0230. Found: 443.0261. Anal. calcd for  $\text{C}_{17}\text{H}_{18}\text{INO}_5$ : C, 46.07; H, 4.09; I, 28.63; N, 3.16. Found: C, 46.09; H, 4.08; I, 28.65; N, 3.15. IR (KBr disc):  $\nu = 3379, 2939, 1685, 1546, 1236\text{ cm}^{-1}$ .

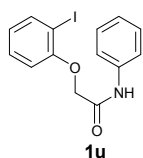

Following the general procedure A. White solid (92%). Mp. 128 – 130 °C.  $^1\text{H}$  NMR (400 MHz,  $\text{CDCl}_3$ )  $\delta = 8.85$  (s, 1H), 7.82 (dd,  $J = 8.0, 1.2$  Hz, 1H), 7.68 (d,  $J = 7.8$  Hz, 2H), 7.40 – 7.34 (m, 3H), 7.16 (t,  $J = 7.4$  Hz, 1H), 6.84 (dd,  $J = 7.6, 5.4$  Hz, 2H), 4.64 (s, 2H).  $^{13}\text{C}$  NMR (100 MHz,  $\text{CDCl}_3$ )  $\delta = 165.12, 155.42, 139.44, 137.13, 130.03, 129.14, 124.81, 124.11, 119.84, 112.54, 86.54, 68.01$ . HRMS (EI) calcd for  $\text{C}_{14}\text{H}_{12}\text{INO}_2$  ( $\text{M}^+$ ): 352.9913. Found: 352.9886. Anal. calcd for  $\text{C}_{14}\text{H}_{11}\text{INO}_2$ : C, 47.61; H, 3.43; I, 35.93; N, 3.97. Found: C, 47.59; H, 3.44; I, 35.94; N, 3.97. IR (KBr disc):  $\nu = 3378, 2921, 1683, 1543, 1289\text{ cm}^{-1}$ .

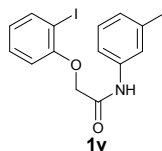

Following the general procedure A. White solid (95%). Mp. 134 – 138 °C.  $^1\text{H}$  NMR (400 MHz,  $\text{CDCl}_3$ )  $\delta = 8.77$  (s, 1H), 7.82 (d,  $J = 7.6$  Hz, 1H), 7.52 (s, 1H), 7.44 (d,  $J = 7.3$  Hz, 1H), 7.36 (t,  $J = 7.4$  Hz, 1H), 7.27 (s, 1H), 7.23 (s, 0H), 6.98 (d,  $J = 7.0$  Hz, 1H), 6.83 (d,  $J = 7.2$  Hz, 2H), 4.63 (s, 2H), 2.38 (s, 3H).  $^{13}\text{C}$  NMR (100 MHz,  $\text{CDCl}_3$ )  $\delta = 165.08, 155.40, 139.43, 139.11, 137.02, 130.02, 128.94, 125.65, 124.09, 120.46, 117.00, 112.52, 86.01, 68.01, 21.56$ . HRMS (EI) calcd for  $\text{C}_{15}\text{H}_{14}\text{INO}_2$  ( $\text{M}^+$ ): 367.0069. Found: 367.0124. Anal. calcd for  $\text{C}_{15}\text{H}_{14}\text{INO}_2$ : C, 49.07; H, 3.84; I, 34.56; N, 3.81. Found: C, 49.09; H, 3.85; I, 34.57; N, 3.79. IR (KBr disc):  $\nu = 3379, 2914, 1687, 1549, 1285\text{ cm}^{-1}$ .

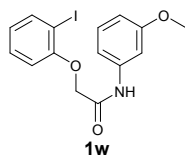

Following the general procedure A. Light yellow solid (96%). Mp. 179 – 180 °C.  $^1\text{H}$  NMR (400 MHz,  $\text{CDCl}_3$ )  $\delta = 8.83$  (s, 1H), 7.82 (dd,  $J = 8.1, 1.4$  Hz, 1H), 7.43 (t,  $J = 2.1$  Hz, 1H), 7.39 – 7.33 (m, 1H), 7.26 (t,  $J = 8.1$  Hz, 1H), 7.18 – 7.12 (m, 1H), 6.84 (dd,  $J = 7.6, 5.3$  Hz, 2H), 6.72 (dd,  $J = 8.2, 2.1$  Hz, 1H), 4.63 (s, 2H), 3.83 (s, 3H).  $^{13}\text{C}$  NMR (100 MHz,  $\text{CDCl}_3$ )  $\delta = 165.13, 160.22, 155.37, 139.44, 138.31, 130.03, 129.82, 124.12, 112.55, 112.09, 110.43, 105.77, 86.48, 68.01, 55.37$ . HRMS (EI) calcd for  $\text{C}_{15}\text{H}_{14}\text{INO}_3$  ( $\text{M}^+$ ): 383.0018. Found: 383.0059. Anal. calcd for  $\text{C}_{15}\text{H}_{14}\text{INO}_3$ : C, 47.02; H, 3.68; I, 33.12; N, 3.66. Found: C, 47.04; H, 3.67; I, 33.14; N, 3.66. IR (KBr disc):  $\nu = 3383, 2937, 1681, 1518, 1266\text{ cm}^{-1}$ .

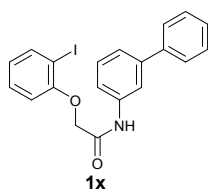

Following the general procedure A. White solid (93%). Mp. 134 – 136 °C.  $^1\text{H}$  NMR (400 MHz,  $\text{CDCl}_3$ )  $\delta = 8.91$  (s, 1H), 7.87 (d,  $J = 33.6$  Hz, 2H), 7.61 (s, 3H), 7.41 (d,  $J = 23.9$  Hz, 6H), 6.85 (s, 2H), 4.67 (s, 2H).  $^{13}\text{C}$  NMR (100 MHz,  $\text{CDCl}_3$ )  $\delta = 165.24, 155.42, 142.37, 140.65,$

139.46, 137.55, 130.05, 129.50, 128.80, 127.57, 127.25, 124.16, 123.71, 118.76, 118.63, 112.59, 86.52, 68.08.

HRMS (EI) calcd for  $C_{20}H_{16}INO_2$  (M+): 429.0226. Found: 429.0208. Anal. calcd for  $C_{20}H_{16}INO_2$ : C, 55.96; H, 3.76; I, 29.56; N, 3.26. Found: C, 55.93; H, 3.75; I, 29.55; N, 3.28. IR (KBr disc):  $\nu = 3382, 2921, 1695, 1541, 1293\text{ cm}^{-1}$ .

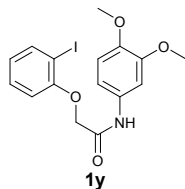

Following the general procedure A. Gray solid (98%). Mp. 136 – 138 °C.  $^1\text{H}$  NMR (400 MHz,  $\text{CDCl}_3$ )  $\delta = 8.74$  (s, 1H), 7.82 (d,  $J = 7.3$  Hz, 1H), 7.50 (s, 1H), 7.37 (s, 1H), 7.02 (d,  $J = 7.7$  Hz, 1H), 6.85 (d,  $J = 7.5$  Hz, 3H), 4.63 (s, 2H), 3.90 (d,  $J = 14.4$  Hz, 6H).  $^{13}\text{C}$  NMR (100 MHz,  $\text{CDCl}_3$ )  $\delta = 164.93, 155.44, 149.19, 146.26, 139.43, 130.76, 130.05, 124.12, 112.63, 111.88, 111.42,$

104.79, 86.46, 68.06, 56.15, 56.02. HRMS (EI) calcd for  $C_{16}H_{16}INO_4$  (M+): 413.0124. Found: 413.0085. Anal. calcd for  $C_{16}H_{16}INO_4$ : C, 46.51; H, 3.90; I, 30.71; N, 3.39. Found: C, 46.54; H, 3.89; I, 30.68 N, 3.40. IR (KBr disc):  $\nu = 3379, 2936, 1686, 1542, 1283\text{ cm}^{-1}$ .

#### 4. General procedure A for synthesis of 8-azaprotosappanin A derivatives (2).

**General procedure B:** The step of the reaction process was to add  $\alpha$ -(2-iodophenoxy)-N-phenylacetamide **1** (1eq) and appropriate amount of anhydrous DMAC (0.2 M to substrate) in a two necked flask at 120 °C in oil bath, then palladium acetate (15 mol%), anhydrous potassium carbonate (2eq) and silver trifluoroacetate (2eq) were added after the mixture was stirred for 15 min. The reaction system was kept under this condition for 10 h. The reaction progress was monitored by TLC. When the whole reaction was over, the reaction mixture was filtered and removed solvent by rotary evaporation. And the crude product was precipitated after cold water was added. At last, the crude product was recrystallized with ether to get the solid pure product. And the characterization of **2** were showed as follows:

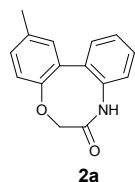

Following the general procedure B. White solid (85%). Mp. 245 – 246 °C.  $^1\text{H}$  NMR (400 MHz, DMSO)  $\delta = 9.73$  (s, 1H), 7.39 (td,  $J = 7.5, 1.9$  Hz, 1H), 7.33 (td,  $J = 7.4, 1.5$  Hz, 1H), 7.29 (dd,  $J = 7.4, 1.9$  Hz, 1H), 7.25 (dd,  $J = 8.3, 2.1$  Hz, 1H), 7.22 – 7.15 (m, 3H), 4.85 (d,  $J = 15.8$  Hz, 1H), 4.47 (d,  $J = 15.7$  Hz, 1H), 2.34 (s, 3H).  $^{13}\text{C}$  NMR (100 MHz, DMSO)  $\delta = 170.19, 153.57, 136.58, 134.87, 134.52,$

132.74, 130.98, 130.13, 129.84, 128.69, 126.90, 125.76, 121.07, 73.56, 20.92. HRMS (EI) calcd for  $C_{15}H_{13}NO_2$  (M+): 240.1025. Found: 240.0973. Anal. calcd for  $C_{15}H_{13}NO_2$ : C, 75.30; H, 5.48; N, 5.85. Found: C, 75.27; H, 5.47; N, 5.85. IR (KBr disc):  $\nu = 3054, 2920, 1659, 1504, 1209\text{ cm}^{-1}$ . HPLC analysis: 98.80%.

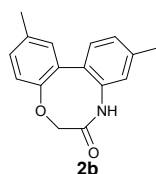

Following the general procedure B. Light yellow solid (87%). Mp. 232 – 234 °C.  $^1\text{H}$  NMR (400 MHz, DMSO)  $\delta = 9.61$  (s, 1H), 7.24 – 7.15 (m, 2H), 7.12 – 7.04 (m, 1H), 4.82 (d,  $J = 15.7$  Hz, 1H),

4.48 – 4.41 (m, 1H), 2.33 (s, 3H).  $^{13}\text{C}$  NMR (100 MHz, DMSO)  $\delta$  = 169.70, 153.10, 135.73, 134.32, 133.85, 133.55, 132.40, 130.38, 130.14, 129.34, 128.62, 125.17, 120.60, 73.07, 20.42, 20.38. HRMS (EI) calcd for  $\text{C}_{16}\text{H}_{15}\text{NO}_2$  (M<sup>+</sup>): 254.1182. Found: 254.1166. Anal.calcd for  $\text{C}_{16}\text{H}_{15}\text{NO}_2$ : C, 75.87; H, 5.97; N, 5.53. Found: C, 75.88; H, 5.95; N, 5.54. IR (KBr disc):  $\nu$  = 3069, 2948, 1648, 1512, 1207  $\text{cm}^{-1}$ . **HPLC analysis: 99.76%.**

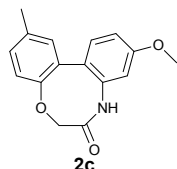

Following the general procedure B. White solid (89%). Mp. 205 – 209 °C.  $^1\text{H}$  NMR (400 MHz, DMSO)  $\delta$  = 9.69 (s, 1H), 7.24 – 7.10 (m, 4H), 6.93 (dd,  $J$  = 8.4, 2.5 Hz, 1H), 6.76 (d,  $J$  = 2.4 Hz, 1H), 4.85 (d,  $J$  = 15.7 Hz, 1H), 4.46 (d,  $J$  = 15.7 Hz, 1H), 3.79 (s, 3H), 2.33 (s, 3H).  $^{13}\text{C}$  NMR (100 MHz, DMSO)  $\delta$  = 170.27, 159.51, 153.64, 137.54, 134.72, 132.46, 130.94, 130.55, 129.98, 126.82, 121.02, 112.10, 111.62, 73.55, 55.82, 20.92. HRMS (EI) calcd for  $\text{C}_{16}\text{H}_{15}\text{NO}_3$  (M<sup>+</sup>): 270.1131. Found: 270.1169. Anal.calcd for  $\text{C}_{16}\text{H}_{15}\text{NO}_3$ : C, 71.36; H, 5.61; N, 5.20. Found: C, 71.38; H, 5.60; N, 5.21. IR (KBr disc):  $\nu$  = 3027, 2960, 1663, 1490, 1289  $\text{cm}^{-1}$ . **HPLC analysis: 99.88%.**

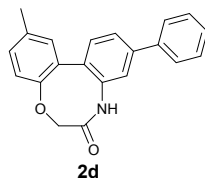

Following the general procedure B. White solid (73%). Mp. 219 – 224 °C.  $^1\text{H}$  NMR (400 MHz, DMSO)  $\delta$  = 9.81 (s, 1H), 7.72 (d,  $J$  = 1.5 Hz, 1H), 7.70 (s, 1H), 7.64 (dd,  $J$  = 7.9, 1.9 Hz, 1H), 7.51 (t,  $J$  = 7.6 Hz, 2H), 7.47 (d,  $J$  = 1.9 Hz, 1H), 7.42 (d,  $J$  = 7.4 Hz, 1H), 7.39 (d,  $J$  = 7.9 Hz, 1H), 7.29 – 7.22 (m, 3H), 4.91 (d,  $J$  = 15.8 Hz, 1H), 4.51 (d,  $J$  = 15.8 Hz, 1H), 2.36 (s, 3H).  $^{13}\text{C}$  NMR (100 MHz, DMSO)  $\delta$  = 170.32, 140.61, 139.55, 137.16, 134.95, 133.44, 132.37, 131.10, 130.75, 129.83, 129.56, 128.30, 127.08, 124.99, 123.94, 121.14, 73.60, 20.95. HRMS (EI) calcd for  $\text{C}_{21}\text{H}_{17}\text{NO}_2$  (M<sup>+</sup>): 316.1338. Found: 316.1374. Anal.calcd for  $\text{C}_{21}\text{H}_{17}\text{NO}_2$ : C, 79.98; H, 5.43; N, 4.44. Found: C, 79.96; H, 5.44; N, 4.45. IR (KBr disc):  $\nu$  = 3064, 2963, 1662, 1517, 1221  $\text{cm}^{-1}$ . **HPLC analysis: 99.77%.**

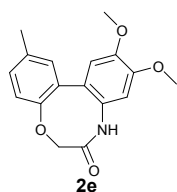

Following the general procedure B. White solid (91%). Mp. 216 – 217 °C.  $^1\text{H}$  NMR (400 MHz, DMSO)  $\delta$  = 9.48 (s, 1H), 7.23 – 7.15 (m, 3H), 6.82 (d,  $J$  = 10.9 Hz, 2H), 4.82 (d,  $J$  = 15.6 Hz, 1H), 4.44 (d,  $J$  = 15.6 Hz, 1H), 3.79 (d,  $J$  = 2.2 Hz, 6H), 2.34 (s, 3H).  $^{13}\text{C}$  NMR (100 MHz, DMSO)  $\delta$  = 170.05, 153.58, 148.52, 147.54, 134.59, 132.70, 130.50, 130.06, 129.21, 126.49, 121.10, 113.26, 110.22, 73.40, 56.31, 56.22, 20.94. HRMS (EI) calcd for  $\text{C}_{17}\text{H}_{17}\text{NO}_4$  (M<sup>+</sup>): 300.1237. Found: 300.1265. Anal. calcd for  $\text{C}_{17}\text{H}_{17}\text{NO}_4$ : C, 68.22; H, 5.72; N, 4.68. Found: C, 68.25; H, 5.71; N, 4.68. IR (KBr disc):  $\nu$  = 3046, 2938, 1657, 1516, 1256  $\text{cm}^{-1}$ . **HPLC analysis: 98.93%.**

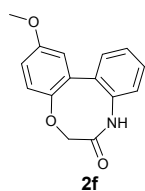

Following the general procedure B. White solid (86%). Mp. 198 – 200 °C.  $^1\text{H}$  NMR (400 MHz, DMSO)  $\delta$  = 9.72 (s, 1H), 7.43 – 7.32 (m, 3H), 7.26 (d,  $J$  = 8.8 Hz, 1H), 7.20 (d,  $J$  = 7.7 Hz, 1H), 7.00 (dd,  $J$  = 8.8, 3.0 Hz, 1H), 6.92 (d,  $J$  = 3.0 Hz, 1H), 4.83 (d,  $J$  = 15.9 Hz, 1H), 4.47 (d,  $J$  = 15.8 Hz, 1H), 3.79 (s, 3H).  $^{13}\text{C}$  NMR (100 MHz, DMSO)  $\delta$  = 169.83, 156.28, 148.85, 136.05, 133.92, 133.44,

129.68, 128.34, 126.39, 125.34, 121.77, 115.47, 113.45, 73.34, 55.49. HRMS (EI) calcd for  $C_{15}H_{13}NO_3$  (M<sup>+</sup>): 256.0974. Found: 256.0933. Anal.calcd for  $C_{15}H_{13}NO_3$ : C, 70.58; H, 5.13; N, 5.49. Found: C, 70.56; H, 5.13; N, 5.52. IR (KBr disc):  $\nu = 3028, 2942, 1660, 1517, 1267\text{ cm}^{-1}$ . **HPLC analysis: 98.80%.**

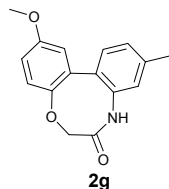

Following the general procedure B. White solid (88%). Mp. 206 – 209 °C. <sup>1</sup>H NMR (400 MHz, DMSO)  $\delta = 9.66$  (s, 1H), 7.26 – 7.18 (m, 2H), 7.17 – 7.13 (m, 1H), 7.02 – 6.95 (m, 2H), 6.88 (d,  $J = 3.0$  Hz, 1H), 4.81 (d,  $J = 15.8$  Hz, 1H), 4.45 (d,  $J = 15.8$  Hz, 1H), 3.78 (s, 3H), 2.34 (s, 3H). <sup>13</sup>C NMR (100 MHz, DMSO)  $\delta = 170.31, 156.70, 149.36, 138.32, 136.28, 133.90, 131.50, 129.99, 127.44, 126.28, 122.21, 115.69, 113.94, 73.80, 55.96, 21.01$ . HMS (EI) calcd for  $C_{16}H_{15}NO_4$  (M<sup>+</sup>): 270.1131. Found: 270.1085. Anal.calcd for  $C_{16}H_{15}NO_4$ : C, 71.36; H, 5.61; N, 5.20. Found: C, 71.34; H, 5.61; N, 5.20. IR (KBr disc):  $\nu = 3052, 2954, 1661, 1519, 1204\text{ cm}^{-1}$ . **HPLC analysis: 99.25%.**

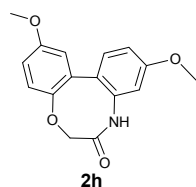

Following the general procedure B. White solid (92%). Mp. 205 – 206 °C. <sup>1</sup>H NMR (400 MHz, DMSO)  $\delta = 9.69$  (s, 1H), 7.23 (dd,  $J = 8.6, 4.0$  Hz, 2H), 6.94 (td,  $J = 10.1, 9.5, 2.8$  Hz, 2H), 6.87 (d,  $J = 3.0$  Hz, 1H), 6.76 (d,  $J = 2.4$  Hz, 1H), 4.83 (d,  $J = 15.8$  Hz, 1H), 4.46 (d,  $J = 15.8$  Hz, 1H), 3.78 (d,  $J = 7.5$  Hz, 6H). <sup>13</sup>C NMR (100 MHz, DMSO)  $\delta = 170.39, 159.60, 156.68, 149.42, 137.50, 133.68, 130.97, 126.69, 122.18, 115.50, 114.04, 112.06, 111.69, 73.83, 55.95, 55.85$ . HRMS (EI) calcd for  $C_{16}H_{15}NO_4$  (M<sup>+</sup>): 286.1080. Found: 286.1109. Anal.calcd for  $C_{16}H_{15}NO_4$ : C, 67.36; H, 5.30; N, 4.91. Found: C, 67.39; H, 5.31; N, 4.90. IR (KBr disc):  $\nu = 3066, 2958, 1657, 1516, 1203\text{ cm}^{-1}$ . **HPLC analysis: 99.48%.**

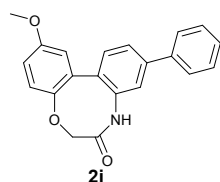

Following the general procedure B. Yellow solid (77%). Mp. 222 – 223 °C. <sup>1</sup>H NMR (400 MHz, DMSO)  $\delta = 9.82$  (s, 1H), 7.70 (d,  $J = 7.7$  Hz, 1H), 7.62 (dd,  $J = 7.9, 1.7$  Hz, 1H), 7.50 (t,  $J = 7.6$  Hz, 1H), 7.45 (s, OH), 7.40 (t,  $J = 7.3$  Hz, 1H), 7.34 (t,  $J = 8.4$  Hz, 1H), 6.97 (d,  $J = 2.4$  Hz, OH), 6.90 (dd,  $J = 8.5, 2.5$  Hz, OH), 4.93 (d,  $J = 15.7$  Hz, 1H), 4.57 (d,  $J = 15.7$  Hz, 1H), 3.82 (s, 1H). <sup>13</sup>C NMR (100 MHz, DMSO)  $\delta = 169.71, 160.77, 156.25, 139.80, 139.12, 136.73, 132.75, 130.42, 129.77, 129.05, 127.74, 126.56, 124.49, 124.14, 123.36, 111.52, 106.30, 72.74, 55.49$ . HRMS (EI) calcd for  $C_{21}H_{17}NO_3$  (M<sup>+</sup>): 332.1287. Found: 332.1324. Anal.calcd for  $C_{21}H_{17}NO_3$ : C, 76.12; H, 5.17; N, 4.23. Found: C, 76.09; H, 5.18; N, 4.24. IR (KBr disc):  $\nu = 3027, 2920, 1657, 1519, 1269\text{ cm}^{-1}$ . **HPLC analysis: 99.24%.**

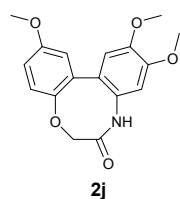

Following the general procedure B. Light yellow solid (92%). Mp. 212 – 214 °C. <sup>1</sup>H NMR (400 MHz, DMSO)  $\delta = 9.46$  (s, 1H), 7.22 (d,  $J = 8.7$  Hz, 1H), 6.99 – 6.91 (m, 2H), 6.87 (s, 1H), 6.81 (s, 1H), 4.80 (d,  $J = 15.7$  Hz, 1H), 4.44 (d,  $J = 15.7$  Hz, 1H), 3.79 (d,  $J = 4.3$  Hz, 9H). <sup>13</sup>C NMR (100 MHz, DMSO)  $\delta = 169.69, 156.14, 148.89, 148.16, 147.02, 133.45, 128.70, 125.86, 121.74, 114.87, 113.83, 112.88, 109.82, 73.19, 55.86, 55.75, 55.50$ . HRMS (EI) calcd for  $C_{17}H_{17}NO_5$  (M<sup>+</sup>): 316.1186. Found:

316.1126. Anal.calcd for  $C_{17}H_{17}NO_5$ : C, 64.75; H, 5.43; N, 4.44. Found: C, 64.78; H, 5.42; N, 4.43. IR (KBr disc):  $\nu=3066, 2958, 1662, 1519, 1207\text{ cm}^{-1}$ . **HPLC analysis: 99.48%.**

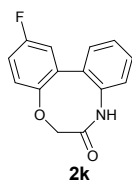

Following the general procedure B. Light yellow solid (79%). Mp. 211 – 213 °C.  $^1\text{H NMR}$  (400 MHz, DMSO)  $\delta = 9.78$  (s, 1H), 7.47 – 7.32 (m, 4H), 7.32 – 7.26 (m, 2H), 7.22 (dd,  $J = 7.9, 1.2$  Hz, 1H), 4.89 (d,  $J = 15.9$  Hz, 1H), 4.53 (d,  $J = 15.9$  Hz, 1H).  $^{13}\text{C NMR}$  (100 MHz, DMSO)  $\delta = 166.99, 159.37$  (d,  $J = 240$  Hz), 151.97 (d,  $J = 3$  Hz), 136.5, 134.86 (d,  $J = 9$  Hz), 133.41 (d,  $J = 1$  Hz), 130.2, 129.2, 127.06, 126.0, 123.27 (d,  $J = 9$  Hz), 117.07 (d,  $J = 24$  Hz), 115.84 (d,  $J = 24$  Hz), 73.73. HRMS (EI) calcd for  $C_{14}H_{10}FNO_2$  (M<sup>+</sup>): 244.0775. Found: 244.0792. Anal.calcd for  $C_{14}H_{10}FNO_2$ : C, 69.13; H, 4.14; F, 7.81; N, 5.76. Found: C, 69.10; H, 4.13; F, 7.79; N, 5.75. IR (KBr disc):  $\nu=3059, 2954, 1659, 1574, 1262\text{ cm}^{-1}$ . **HPLC analysis: 99.69%.**

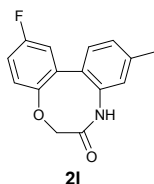

Following the general procedure B. White solid (81%). Mp. 229 – 231 °C.  $^1\text{H NMR}$  (400 MHz, DMSO)  $\delta = 9.71$  (s, 1H), 7.38 (dd,  $J = 8.7, 4.9$  Hz, 1H), 7.30 – 7.15 (m, 4H), 7.03 (s, 1H), 4.87 (d,  $J = 15.8$  Hz, 1H), 4.51 (d,  $J = 15.8$  Hz, 1H), 2.35 (s, 3H).  $^{13}\text{C NMR}$  (100 MHz, DMSO)  $\delta = 169.99, 159.34$  (d,  $J = 240$  Hz), 151.99 (d,  $J = 2$  Hz), 138.8, 136.3, 134.85 (d,  $J = 9$  Hz), 130.54 (d,  $J = 1$  Hz), 130.05, 127.60, 126.5, 123.22 (d,  $J = 9$  Hz), 116.82 (d,  $J = 23$  Hz), 115.82 (d,  $J = 23$  Hz), 73.7, 21.0. HRMS (EI) calcd for  $C_{15}H_{12}FNO_2$  (M<sup>+</sup>): 258.0931. Found: 258.0896. Anal.calcd for  $C_{15}H_{12}FNO_2$ : C, 70.03; H, 4.70; F, 7.38; N, 5.44. Found: C, 70.05; H, 4.69; F, 7.39; N, 5.45. IR (KBr disc):  $\nu=3076, 2954, 1662, 1518, 1261\text{ cm}^{-1}$ . **HPLC analysis: 99.86%.**

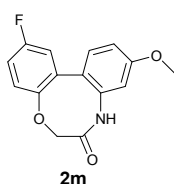

Following the general procedure B. Light yellow solid (84%). Mp. 221 – 225 °C.  $^1\text{H NMR}$  (400 MHz, DMSO)  $\delta = 9.71$  (s, 1H), 7.38 (dd,  $J = 8.8, 5.0$  Hz, 1H), 7.30 – 7.19 (m, 3H), 7.17 (dd,  $J = 7.8, 1.6$  Hz, 1H), 7.03 (d,  $J = 1.6$  Hz, 1H), 4.87 (d,  $J = 15.8$  Hz, 1H), 4.51 (d,  $J = 15.8$  Hz, 1H), 2.35 (s, 3H).  $^{13}\text{C NMR}$  (100 MHz, DMSO)  $\delta = 169.99, 159.34$  (d,  $J = 243$  Hz), 151.99 (d,  $J = 2$  Hz), 138.83, 136.25, 134.96 (d,  $J = 9$  Hz), 130.53, 130.05, 127.60, 126.45, 123.22 (d,  $J = 9$  Hz), 116.82 (d,  $J = 23$  Hz), 115.80 (d,  $J = 23$  Hz), 73.71, 21.02. HRMS (EI) calcd for  $C_{15}H_{12}FNO_3$  (M<sup>+</sup>): 273.0801 Found: 273.0842 Anal.calcd for  $C_{15}H_{12}FNO_3$ : C, 65.93; H, 4.43; F, 6.95; N, 5.13. Found: C, 65.95; H, 4.42; F, 6.96; N, 5.14. IR (KBr disc):  $\nu=3074, 2953, 1662, 1568, 1261\text{ cm}^{-1}$ . **HPLC analysis: 99.28%.**

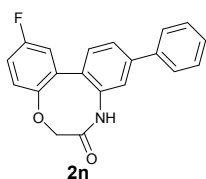

Following the general procedure B. White solid (62%). Mp. 267 – 268 °C.  $^1\text{H NMR}$  (400 MHz, DMSO)  $\delta = 9.84$  (s, 1H), 7.74 – 7.69 (m, 2H), 7.65 (dd,  $J = 7.9, 1.9$  Hz, 1H), 7.54 – 7.49 (m, 2H), 7.49 – 7.38 (m, 5H), 7.38 – 7.30 (m, 2H), 4.95 (d,  $J = 15.8$  Hz, 1H), 4.56 (d,  $J = 15.8$  Hz, 1H).  $^{13}\text{C NMR}$  (100 MHz, DMSO)  $\delta = 170.11, 159.41$  (d,  $J = 240$  Hz), 152.06 (d,  $J = 3$  Hz), 141.1, 139.4, 137.1, 134.50 (d,  $J = 9$  Hz), 132.30, 130.85, 129.58, 128.41, 127.13, 125.09, 124.17, 123.34 (d,  $J = 10$

Hz), 117.19 (d,  $J = 23$  Hz), 115.86 (d,  $J = 24$  Hz), 73.8. HRMS (EI) calcd for  $C_{20}H_{14}FNO_2$  ( $M^+$ ): 320.1088. Found: 320.1148. Anal.calcd for  $C_{20}H_{14}FNO_2$ : C, 75.22; H, 4.42; F, 5.95; N, 4.39. Found: C, 75.26; H, 4.44; F, 5.91; N, 4.37. IR (KBr disc):  $\nu = 3065, 2925, 1660, 1555, 1261$   $cm^{-1}$ . **HPLC analysis: 99.27%.**

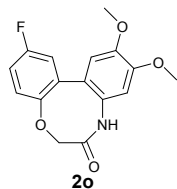

Following the general procedure B. Yellow solid (86%). Mp. 243 – 247 °C.  $^1H$  NMR (400 MHz, DMSO)  $\delta = 9.54$  (s, 1H), 7.36 (dd,  $J = 8.8, 5.0$  Hz, 1H), 7.27 (td,  $J = 8.8, 3.1$  Hz, 2H), 6.89 (s, 1H), 6.83 (s, 1H), 4.86 (d,  $J = 15.7$  Hz, 1H), 4.50 (d,  $J = 15.8$  Hz, 1H), 3.80 (d,  $J = 2.9$  Hz, 6H).  $^{13}C$  NMR (100 MHz, DMSO)  $\delta = 169.87, 159.26$  (d,  $J = 240$  Hz), 152.00, 148.89, 147.56, 134.86 (d,  $J = 9$  Hz), 129.18, 125.31, 123.23 (d,  $J = 9$  Hz), 116.55 (d,  $J = 23$  Hz), 116.06 (d,  $J = 23$  Hz), 113.32, 110.33, 73.55, 56.32, 56.24. HRMS (EI) calcd for  $C_{16}H_{14}FNO_4$  ( $M^+$ ): 304.0986. Found: 304.0962. Anal.calcd for  $C_{16}H_{14}FNO_4$ : C, 63.36; H, 4.65; F, 6.26; N, 4.62. Found: C, 63.38; H, 4.64; F, 6.27; N, 4.63. IR (KBr disc):  $\nu = 3057, 2943, 1656, 1519, 1260$   $cm^{-1}$ . **HPLC analysis: 99.97%.**

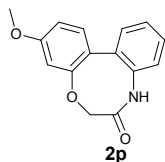

Following the general procedure B. Light white solid (86%). Mp. 201 – 203 °C.  $^1H$  NMR (400 MHz, DMSO)  $\delta = 9.75$  (s, 1H), 7.40 – 7.31 (m, 2H), 7.30 – 7.24 (m, 2H), 7.17 (dd,  $J = 7.6, 1.6$  Hz, 1H), 6.94 (d,  $J = 2.5$  Hz, 1H), 6.87 (dd,  $J = 8.5, 2.5$  Hz, 1H), 4.88 (d,  $J = 15.6$  Hz, 1H), 4.53 (d,  $J = 15.6$  Hz, 1H), 3.80 (s, 3H).  $^{13}C$  NMR (100 MHz, DMSO)  $\delta = 170.06, 161.15, 156.63, 136.65, 134.30, 130.31, 130.24, 128.36, 126.88, 125.67, 125.00, 111.91, 106.72, 73.18, 55.97$ . HRMS (EI) calcd for  $C_{15}H_{13}NO_3$  ( $M^+$ ): 256.0974. Found: 256.0943. Anal.calcd for  $C_{15}H_{13}NO_3$ : C, 70.58; H, 5.13; N, 5.49. Found: C, 70.61; H, 5.12; N, 5.50. IR (KBr disc):  $\nu = 3054, 2959, 1663, 1514, 1259$   $cm^{-1}$ . **HPLC analysis: 99.78%.**

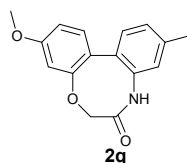

Following the general procedure B. White solid (89%). Mp. 253 – 254 °C.  $^1H$  NMR (400 MHz, DMSO)  $\delta = 9.69$  (s, 1H), 7.23 (d,  $J = 8.4$  Hz, 1H), 7.13 (d,  $J = 1.0$  Hz, 2H), 6.98 (s, 1H), 6.91 (d,  $J = 2.5$  Hz, 1H), 6.85 (dd,  $J = 8.5, 2.5$  Hz, 1H), 4.86 (d,  $J = 15.5$  Hz, 1H), 4.50 (d,  $J = 15.5$  Hz, 1H), 3.79 (s, 3H), 2.33 (s, 3H).  $^{13}C$  NMR (100 MHz, DMSO)  $\delta = 170.04, 160.97, 156.62, 137.80, 136.41, 131.42, 130.28, 130.17, 127.48, 126.11, 124.88, 111.80, 106.68, 73.12, 55.94, 20.98$ . HRMS (EI) calcd for  $C_{16}H_{15}NO_3$  ( $M^+$ ): 270.1131. Found: 270.1141. Anal.calcd for  $C_{16}H_{15}NO_3$ : C, 71.36; H, 5.61; N, 5.20. Found: C, 71.38; H, 5.60; N, 5.21. IR (KBr disc):  $\nu = 3061, 2961, 1655, 1564, 1257$   $cm^{-1}$ . **HPLC analysis: 99.83%.**

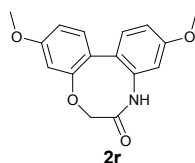

Following the general procedure B. White solid (90%). Mp. 182 – 184 °C.  $^1H$  NMR (400 MHz, DMSO)  $\delta = 9.72$  (s, 1H), 7.22 (d,  $J = 8.4$  Hz, 1H), 7.16 (d,  $J = 8.5$  Hz, 1H), 6.91 (dd,  $J = 8.8, 2.6$  Hz, 2H), 6.84 (dd,  $J = 8.4, 2.5$  Hz, 1H), 6.75 (d,  $J = 2.6$  Hz, 1H), 4.88 (d,  $J = 15.5$  Hz, 1H), 4.51 (d,  $J = 15.5$  Hz, 1H), 3.79 (d,  $J = 2.2$  Hz, 6H).  $^{13}C$  NMR (100 MHz, DMSO)  $\delta = 170.11, 160.83, 159.28, 156.64, 137.57, 131.11, 130.40, 126.62, 124.65, 112.15, 111.77, 111.48, 106.65, 73.16, 55.93, 55.81$ . HRMS (EI) calcd for

$C_{16}H_{15}NO_4$  (M<sup>+</sup>): 286.1080. Found: 286.1036. Anal.calcd for  $C_{16}H_{15}NO_4$ : C, 67.36; H, 5.30; N, 4.91. Found: C, 67.39; H, 5.29; N, 4.90. IR (KBr disc):  $\nu = 3003, 2958, 1663, 1567, 1287\text{ cm}^{-1}$ . **HPLC analysis: 99.91%.**

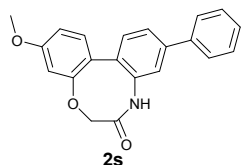

Following the general procedure B. White solid (79%). Mp. 225 – 226 °C.  $^1\text{H NMR}$  (400 MHz, DMSO)  $\delta = 9.82$  (s, 1H), 7.73 – 7.67 (m, 2H), 7.62 (dd,  $J = 7.9, 2.0$  Hz, 1H), 7.50 (t,  $J = 7.6$  Hz, 2H), 7.45 (d,  $J = 1.9$  Hz, 1H), 7.41 (d,  $J = 7.4$  Hz, 1H), 7.34 (t,  $J = 8.4$  Hz, 2H),

6.97 (d,  $J = 2.5$  Hz, 1H), 6.90 (dd,  $J = 8.5, 2.5$  Hz, 1H), 4.93 (d,  $J = 15.7$  Hz, 1H), 4.57 (d,  $J = 15.7$  Hz, 1H), 3.82 (s, 3H).  $^{13}\text{C NMR}$  (100 MHz, DMSO)  $\delta = 170.20, 161.25, 156.73, 140.28, 139.60, 137.21, 133.23, 130.90, 130.25, 129.55, 128.24, 127.05, 124.98, 124.63, 123.85, 112.02, 106.79, 73.23, 55.99$ . HRMS (EI) calcd for  $C_{21}H_{17}NO_3$  (M<sup>+</sup>): 332.1287. Found: 332.1316. Anal.calcd for  $C_{21}H_{17}NO_3$ : C, 76.12; H, 5.17; N, 4.23. Found: C, 76.15; H, 5.16; N, 4.23. IR (KBr disc):  $\nu = 3058, 2918, 1657, 1549, 1269\text{ cm}^{-1}$ . **HPLC analysis: 99.25%.**

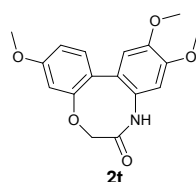

Following the general procedure B. Yellow solid (94%). Mp. 184 – 186 °C.  $^1\text{H NMR}$  (400 MHz, DMSO)  $\delta = 9.52$  (s, 1H), 7.27 (d,  $J = 8.4$  Hz, 1H), 6.90 (d,  $J = 2.6$  Hz, 1H), 6.84 (dd,  $J = 8.5, 2.6$  Hz, 1H), 6.79 (s, 2H), 4.85 (d,  $J = 15.4$  Hz, 1H), 4.50 (s, 1H), 3.82 – 3.75 (m, 9H).  $^{13}\text{C NMR}$  (100 MHz, DMSO)  $\delta = 169.90, 160.78, 156.59, 148.34, 147.52, 130.56, 129.26, 126.31,$

124.87, 113.48, 111.63, 110.10, 106.66, 72.96, 56.27, 56.22, 55.94. HRMS (EI) calcd for  $C_{17}H_{17}NO_5$  (M<sup>+</sup>): 316.1186. Found: 316.1150. Anal.calcd for  $C_{17}H_{17}NO_5$ : C, 64.75; H, 5.43; N, 4.44. Found: C, 64.73; H, 5.43; N, 4.43. IR (KBr disc):  $\nu = 3063, 2961, 1663, 1523, 1253\text{ cm}^{-1}$ . **HPLC analysis: 99.78%.**

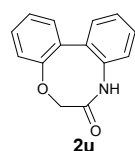

Following the general procedure B. White solid (84%). Mp. 189 – 192 °C.  $^1\text{H NMR}$  (400 MHz, DMSO)  $\delta = 9.75$  (s, 1H), 7.49 – 7.28 (m, 7H), 7.24 – 7.16 (m, 1H), 4.90 (d,  $J = 15.7$  Hz, 1H), 4.52 (d,  $J = 15.8$  Hz, 1H).  $^{13}\text{C NMR}$  (100 MHz, DMSO)  $\delta = 170.08, 155.73, 136.57, 134.43, 133.06, 130.60,$

130.22, 129.57, 128.79, 126.99, 125.80, 125.76, 121.42, 73.50. HRMS (EI) calcd for  $C_{14}H_{11}NO_2$  (M<sup>+</sup>): 226.0869. Found: 226.0846. Anal.calcd for  $C_{14}H_{11}NO_2$ : C, 74.65; H, 4.92; N, 6.22. Found: C, 74.62; H, 4.93; N, 6.23. IR (KBr disc):  $\nu = 3057, 2957, 1663, 1503, 1203\text{ cm}^{-1}$ . **HPLC analysis: 99.32%.**

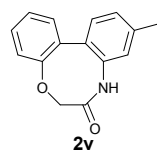

Following the general procedure B. White solid (85%). Mp. 219 – 223 °C.  $^1\text{H NMR}$  (400 MHz, DMSO)  $\delta = 9.70$  (s, 1H), 7.43 (ddd,  $J = 8.2, 7.1, 1.9$  Hz, 1H), 7.35 (dd,  $J = 7.5, 1.8$  Hz, 1H), 7.29 (ddd,  $J = 14.5, 7.6, 1.2$  Hz, 2H), 7.17 (d,  $J = 2.1$  Hz, 2H), 7.01 (s, 1H), 4.88 (d,  $J = 15.7$  Hz, 1H),

4.50 (d,  $J = 15.6$  Hz, 1H), 2.34 (s, 3H).  $^{13}\text{C NMR}$  (100 MHz, DMSO)  $\delta = 170.08, 155.75, 138.29, 136.34, 132.99, 131.55, 130.35, 130.08, 129.60, 127.58, 126.25, 125.66, 121.38, 73.46, 21.01$ . HRMS (EI) calcd for  $C_{15}H_{13}NO_2$  (M<sup>+</sup>): 240.1025. Found: 240.0992. Anal.calcd for  $C_{15}H_{13}NO_2$ : C, 75.30; H, 5.48; N, 5.85. Found: C, 75.33; H, 5.49; N, 5.83.

IR (KBr disc):  $\nu = 3027, 2954, 1660, 1515, 1202 \text{ cm}^{-1}$ . HPLC analysis: 99.48%.

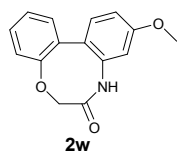

Following the general procedure B. Light yellow solid (88%). Mp. 187 – 189 °C.  $^1\text{H}$  NMR (400 MHz, DMSO)  $\delta = 9.72$  (s, 1H), 7.44 – 7.39 (m, 1H), 7.35 – 7.26 (m, 3H), 7.21 (d,  $J = 8.4$  Hz, 1H), 6.94 (dd,  $J = 8.4, 2.5$  Hz, 1H), 6.77 (d,  $J = 2.4$  Hz, 1H), 4.90 (d,  $J = 15.6$  Hz, 1H), 4.50 (d,  $J = 15.7$

Hz, 1H), 3.80 (s, 3H).  $^{13}\text{C}$  NMR (100 MHz, DMSO)  $\delta = 170.16, 159.59, 155.80, 137.55, 132.76, 131.06, 130.15, 129.72, 126.72, 125.63, 121.36, 112.19, 111.67, 73.48, 55.84$ . HRMS (EI) calcd for  $\text{C}_{15}\text{H}_{13}\text{NO}_3$  (M<sup>+</sup>): 226.0974.

Found: 256.0938. Anal. calcd for  $\text{C}_{15}\text{H}_{13}\text{NO}_3$ : C, 70.51; H, 5.20; N, 5.57. Found: C, 70.49; H, 5.21; N, 5.52. IR (KBr disc):  $\nu = 3065, 2921, 1663, 1516, 1206 \text{ cm}^{-1}$ . HPLC analysis: 99.97%.

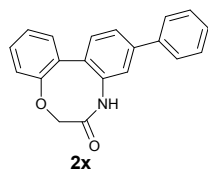

Following the general procedure B. White solid (74%). Mp. 256 – 258 °C.  $^1\text{H}$  NMR (400 MHz, DMSO)  $\delta = 9.86$  (s, 1H), 7.76 – 7.63 (m, 3H), 7.56 – 7.39 (m, 6H), 7.32 (dq,  $J = 8.8, 5.2, 4.3$  Hz, 2H), 4.94 (d,  $J = 16.1$  Hz, 1H), 4.57 (d,  $J = 15.9$  Hz, 1H).  $^{13}\text{C}$  NMR (100 MHz,

DMSO)  $\delta = 170.22, 155.82, 140.72, 139.53, 137.15, 133.34, 132.70, 130.84, 130.70, 129.57, 128.32, 127.10, 125.84, 125.09, 123.98, 121.49, 73.55$ . HRMS (EI) calcd for  $\text{C}_{20}\text{H}_{15}\text{NO}_2$  (M<sup>+</sup>): 302.1182. Found: 302.1138.

Anal. calcd for  $\text{C}_{20}\text{H}_{15}\text{NO}_2$ : C, 79.63; H, 5.13; N, 4.71. Found: C, 79.66; H, 5.12; N, 4.70. IR (KBr disc):  $\nu = 3066, 2901, 1658, 1525, 1211 \text{ cm}^{-1}$ . HPLC analysis: 99.34%.

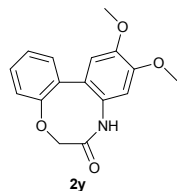

Following the General procedure B. White solid (90%). Mp. 215 – 218 °C.  $^1\text{H}$  NMR (400 MHz, DMSO)  $\delta = 9.51$  (s, 1H), 7.42 – 7.36 (m, 2H), 7.29 (dd,  $J = 7.7, 2.3$  Hz, 2H), 6.83 (d,  $J = 8.4$  Hz, 2H), 4.87 (d,  $J = 15.5$  Hz, 1H), 4.48 (d,  $J = 15.5$  Hz, 1H), 3.79 (s, 6H).  $^{13}\text{C}$  NMR (100 MHz, DMSO)

$\delta = 169.95, 155.75, 148.62, 147.59, 132.98, 130.11, 129.87, 129.23, 126.38, 125.48, 121.43,$

113.38, 110.23, 73.30, 56.30, 56.23. HRMS (EI) calcd for  $\text{C}_{16}\text{H}_{15}\text{NO}_4$  (M<sup>+</sup>): 286.1180. Found: 286.1235. Anal. calcd for  $\text{C}_{16}\text{H}_{15}\text{NO}_4$ : C, 67.36; H, 5.30; N, 4.91. Found: C, 67.39; H, 5.29; N, 4.90. IR (KBr disc):  $\nu = 3057, 2959, 1659, 1515, 1256 \text{ cm}^{-1}$ . HPLC analysis: 99.19%.

## 5. Synthesis of 8-azaprotosappanin A

Added 2t (1 mmol), 40% HBr (4 equiv) and HOAc (1.2 equiv) in the flask. The mixture was stirred for 20 h at 110 °C under inert atmosphere and then cooled down to room temperature. The mixture was poured into ice water and adjusted pH  $\approx 5-6$ . Which was extracted with ethyl acetate three times. The organic phase was dried over  $\text{Na}_2\text{SO}_4$ . After filtration, the solvent was evaporated under reduced pressure. 8-azaprotosappanin A was obtained by flash silica gel column chromatography eluting with a petroleum ether/ethyl acetate gradient (95:5,



v/v). Yield 80%, light yellow solid.

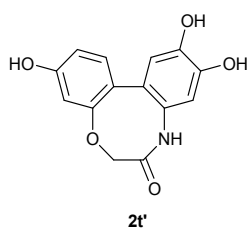

Light yellow solid (80%). Mp. 276 – 278 °C. <sup>1</sup>H NMR (400 MHz, DMSO-*d*<sub>6</sub>) δ = 9.68 (s, 1H), 9.52 (s, 1H), 8.93 (s, 1H), 8.91 (s, 1H), 7.19 (d, *J* = 8.5 Hz, 1H), 6.84 (s, 1H), 6.78 (s, 1H), 6.75 (dd, *J* = 8.5, 2.5 Hz, 1H), 6.69 (d, *J* = 2.5 Hz, 1H), 4.85 (d, *J* = 15.4 Hz, 1H), 4.49 (d, *J* = 15.4 Hz, 1H). <sup>13</sup>C NMR (100 MHz, DMSO) δ = 169.69, 160.78, 153.58, 148.52, 147.54, 131.11, 130.40, 126.62, 124.65, 114.87, 113.83, 112.88, 109.82, 73.80. HRMS (EI) calcd for C<sub>14</sub>H<sub>11</sub>NO<sub>5</sub> (M<sup>+</sup>): 273.0637. Found: 273.0586. Anal. calcd for C<sub>14</sub>H<sub>11</sub>NO<sub>5</sub>: C, 61.54; H, 4.06; N, 5.13. Found: C, 61.58; H, 4.05; N, 5.12. IR (KBr disc): ν = 3318, 3048, 2895, 1677, 1527, 1239 cm<sup>-1</sup>. HPLC analysis: 99.54%.

## 6. Antibacterial studies

*Staphylococcus aureus* (ATCC 25923), methicillin-resistant *Staphylococcus aureus* (MRSA, clinical isolate), *Staphylococcus epidermidis* (ATCC 12228) *Enterococcus faecalis* (ATCC 29212) and *E. coli* (ATCC 25922) were used as the antibacterial test strains. The in vitro antibacterial activity of the compounds was tested by using the test bacteria maintained on the nutrient agar (NA) medium at 37 °C. The bacteria were cultured in LB culture medium with 96 holes plate. The compound concentration was diluted by double fold and was kept at 32, 16, 8, 4, 2, 1, 0.5, 0.25, 0.125, 0.062, 0.031, 0 (μg/mL), then the plate was cultured at 37 °C for 24 h. The 96 holes plate was scan in a MULTISKAN EX microplate reader and the growth of bacteria was showed by UV absorption. The lowest concentration of the compound without bacteria growth was assigned to be the MIC value. Most compounds exhibited excellent in vitro antibacterial activity against Gram-positive.

## 7. Characterization of 2-iodophenols

<sup>1</sup>H NMR spectra of 2-iodo-5-methoxy-phenol

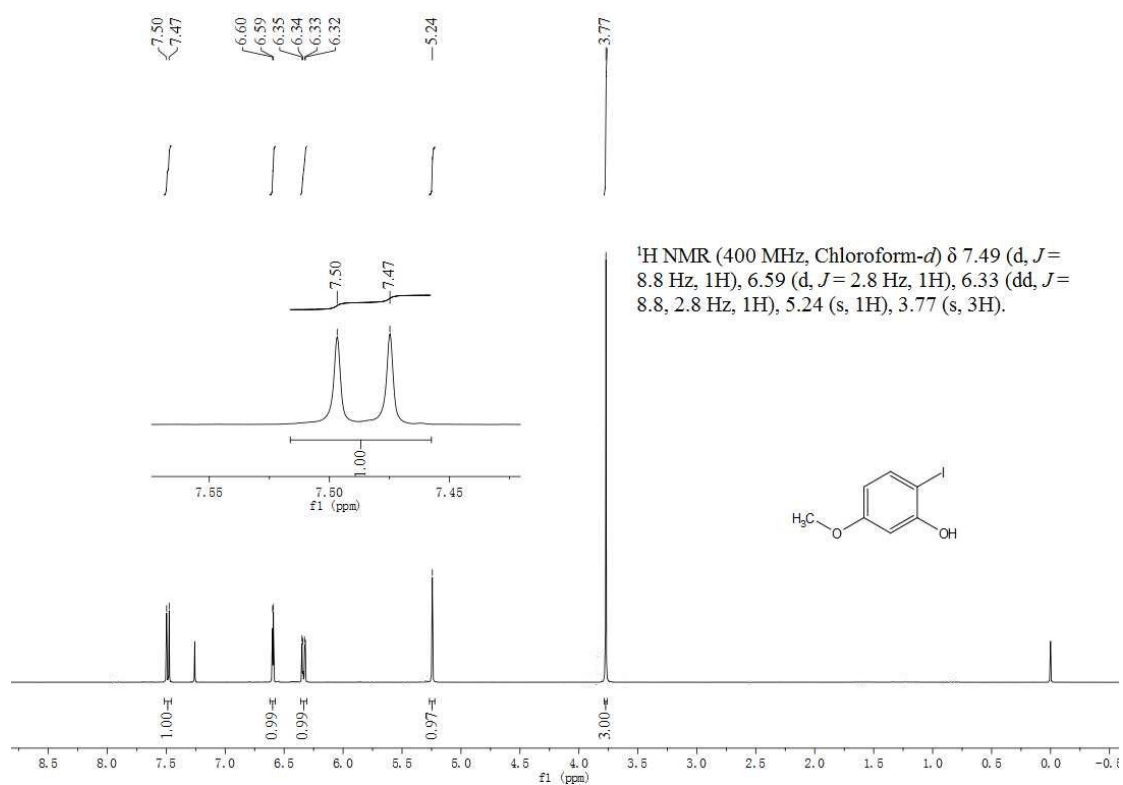

<sup>1</sup>H NMR spectra of 2-iodo-4-methyl-phenol

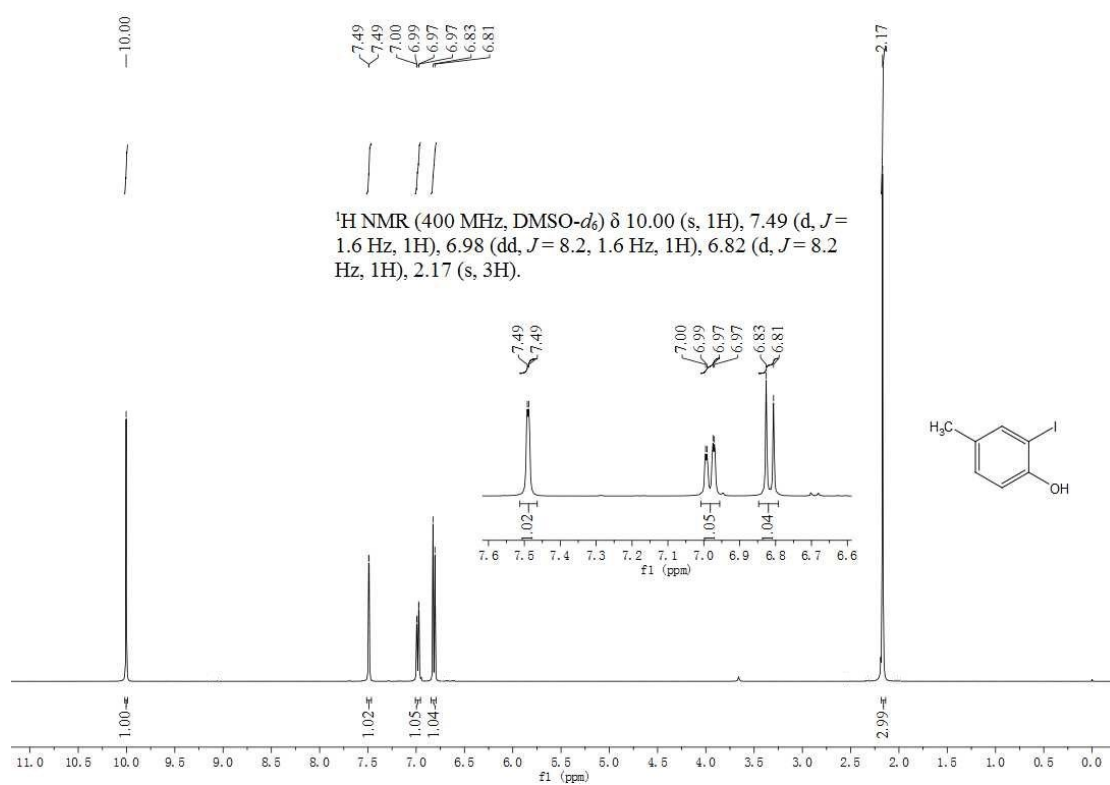

<sup>1</sup>H NMR spectra of 2-iodo-4-fluoro-phenol

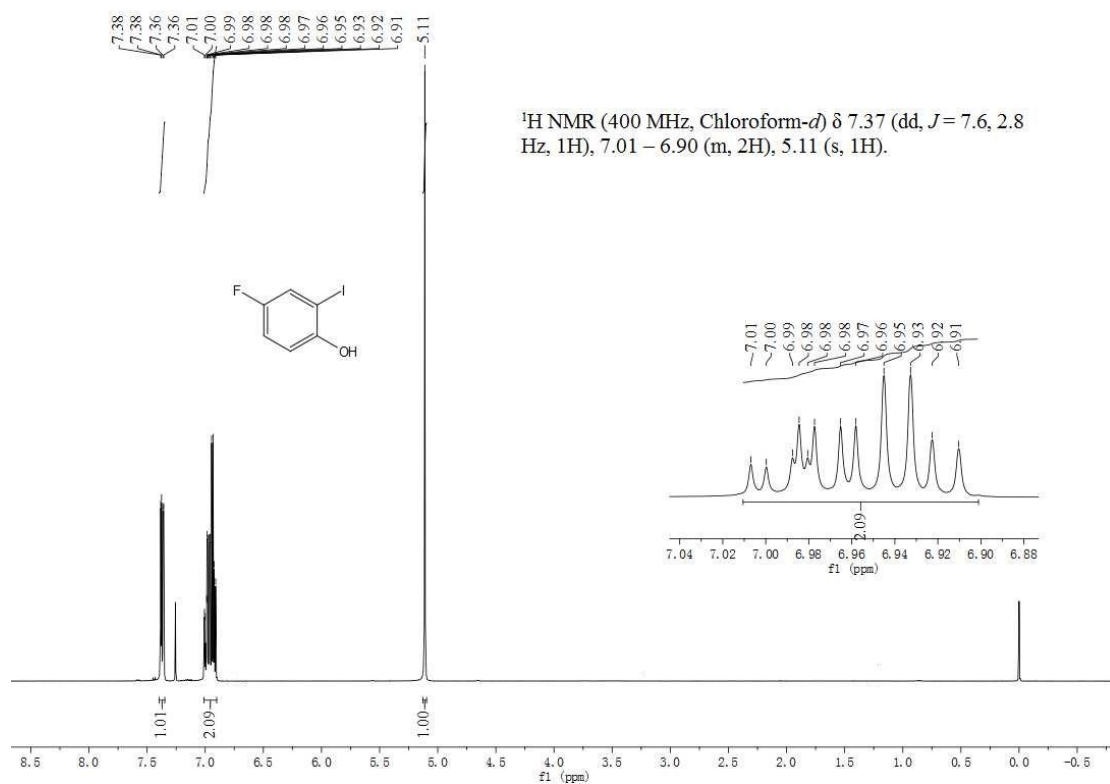

<sup>1</sup>H NMR spectra of 2-iodo-4-methoxy-phenol

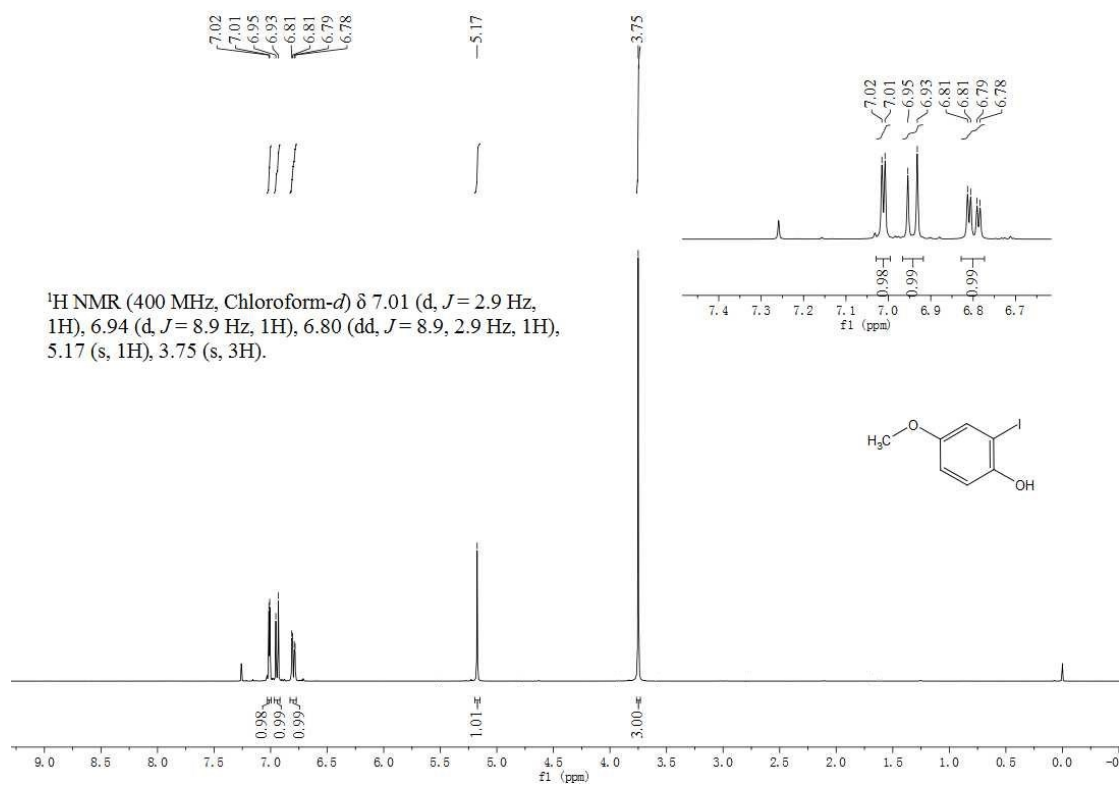

8. <sup>1</sup>H and <sup>13</sup>C NMR spectra for α-(2-Iodophenoxy)-N-phenylacetamide derivatives (1)

NMR spectra of 1a

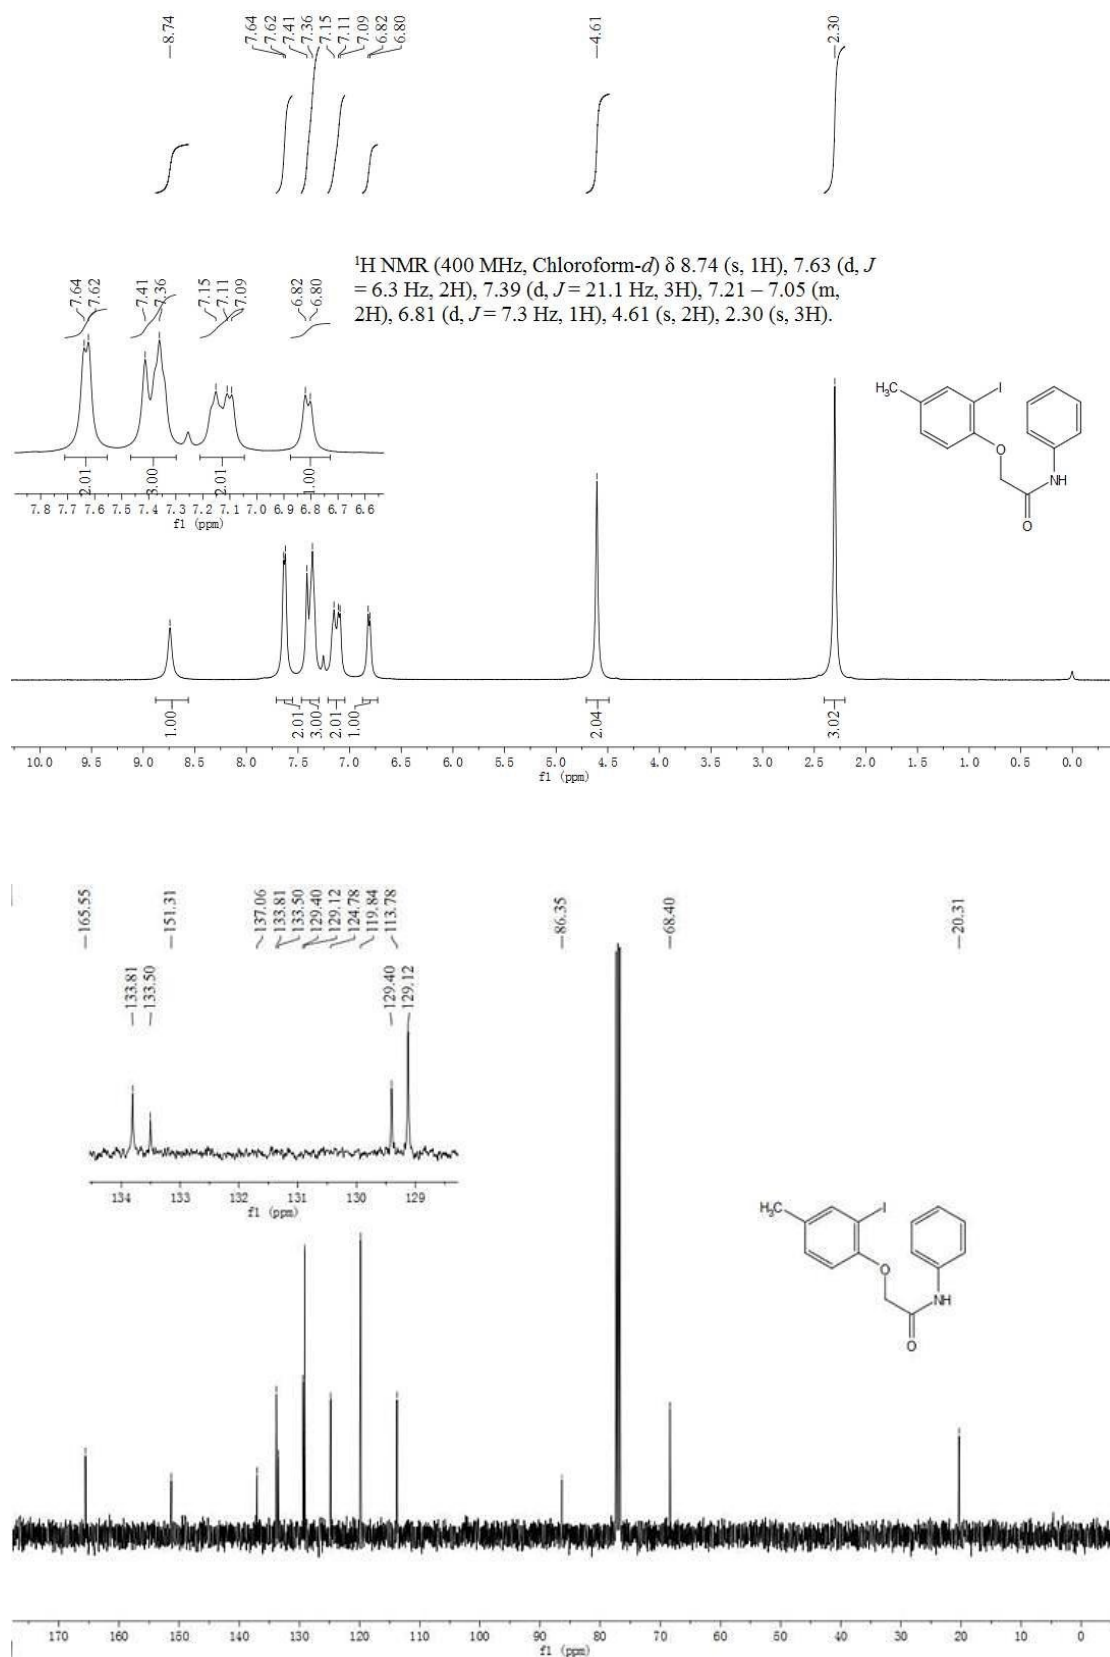

NMR spectra of **1b**

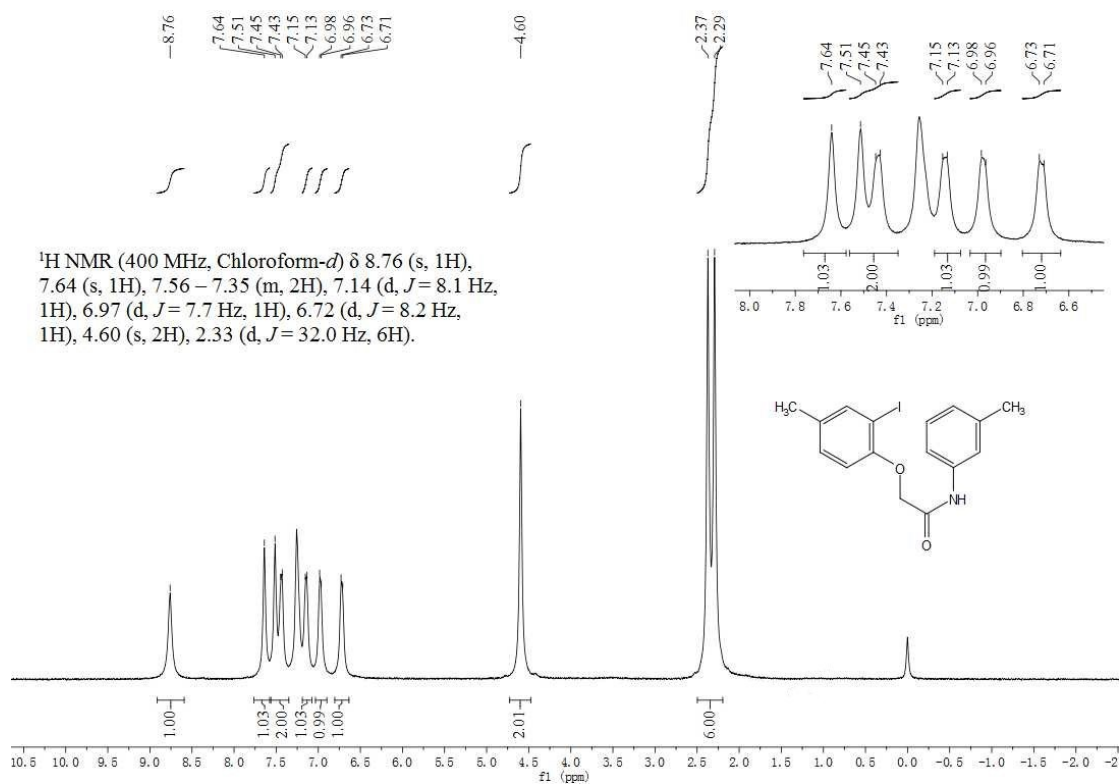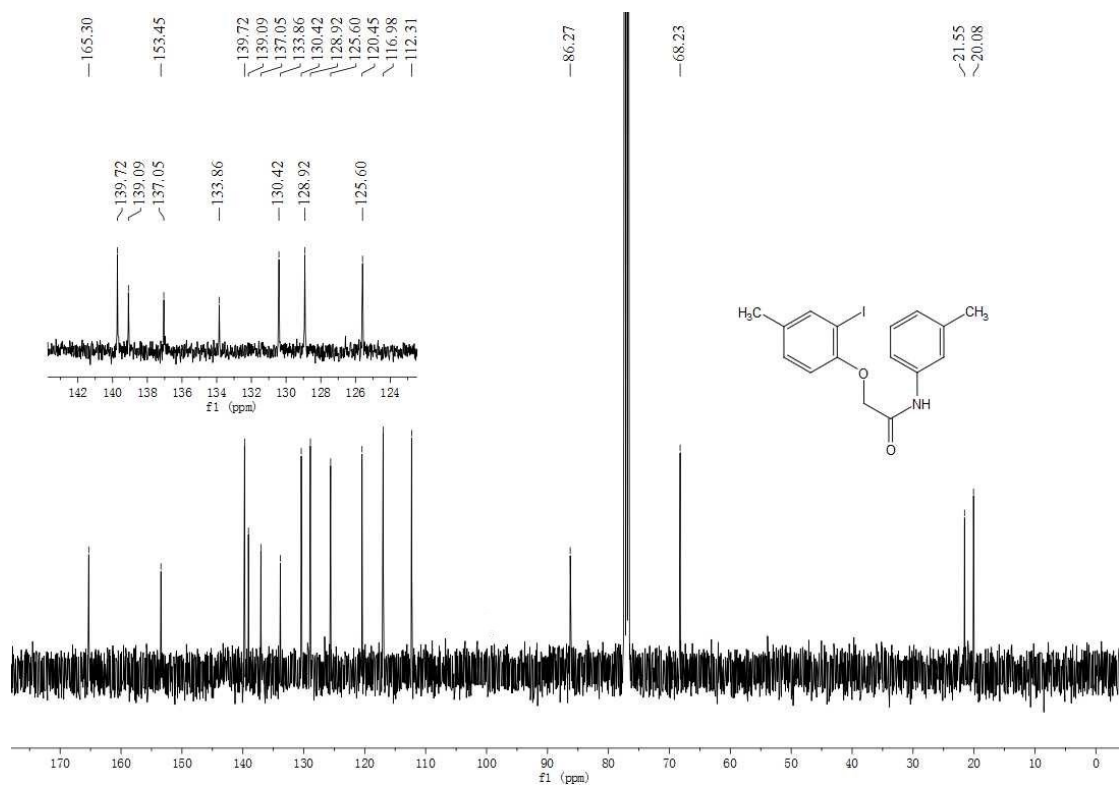

NMR spectra of **1c**

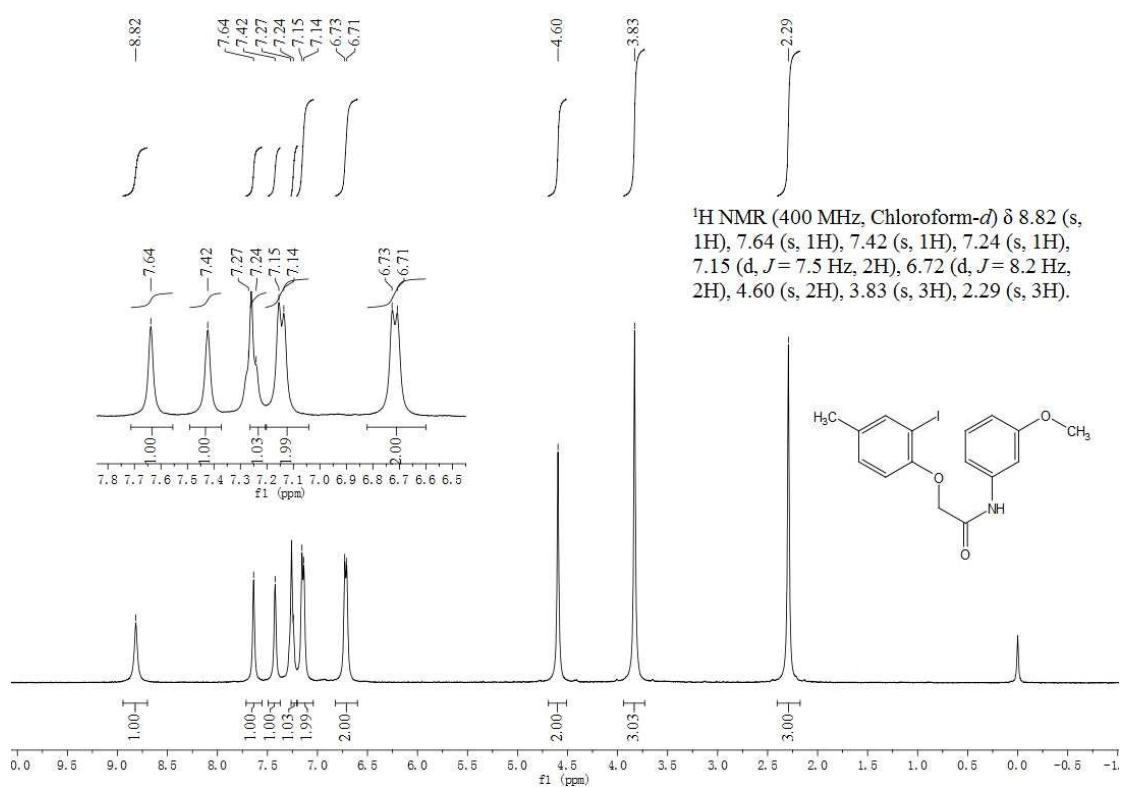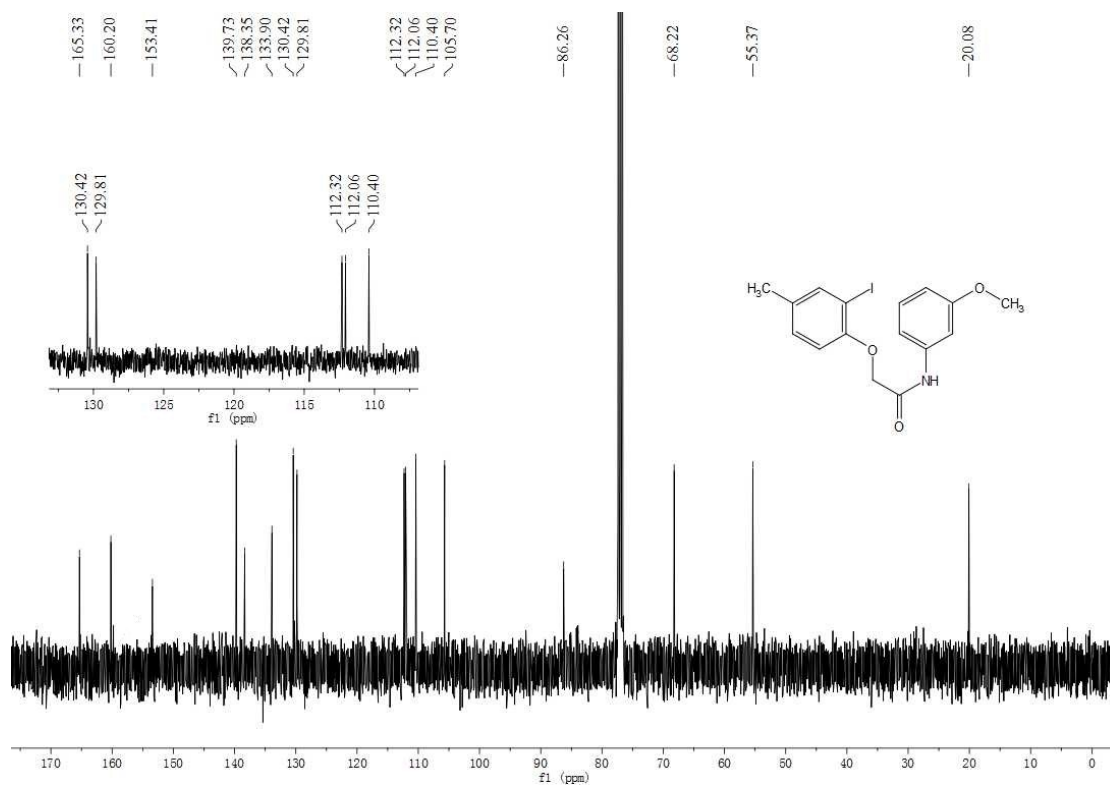

NMR spectra of **1d**

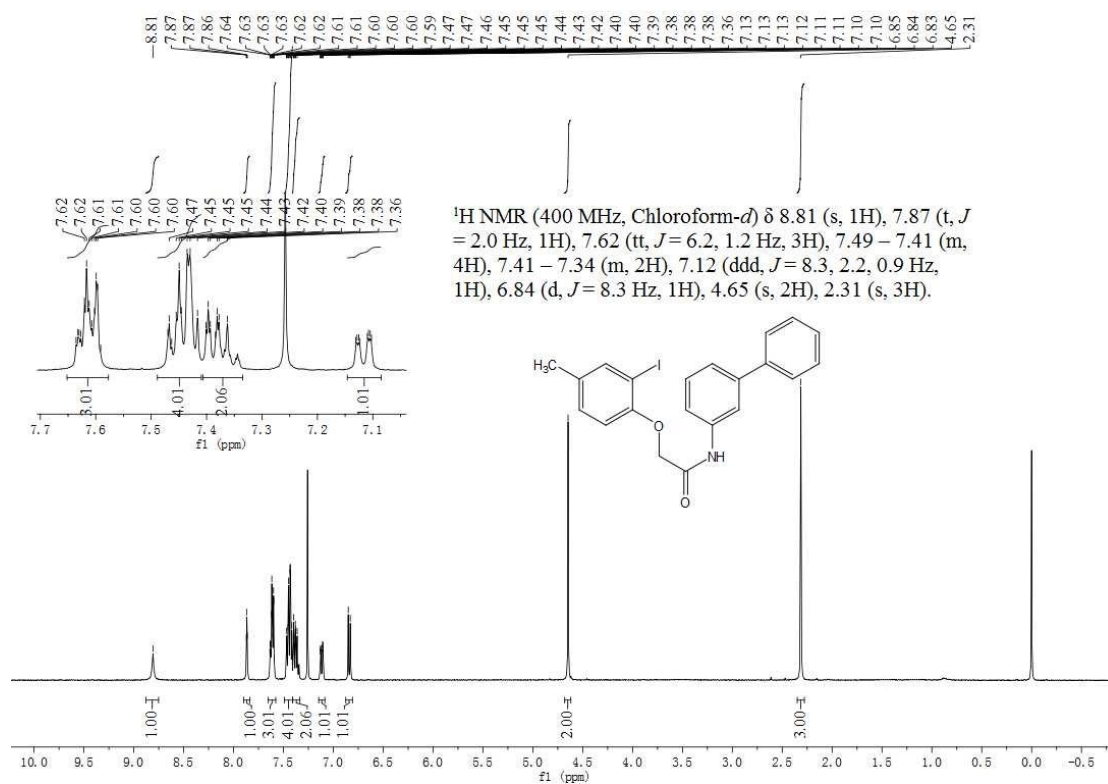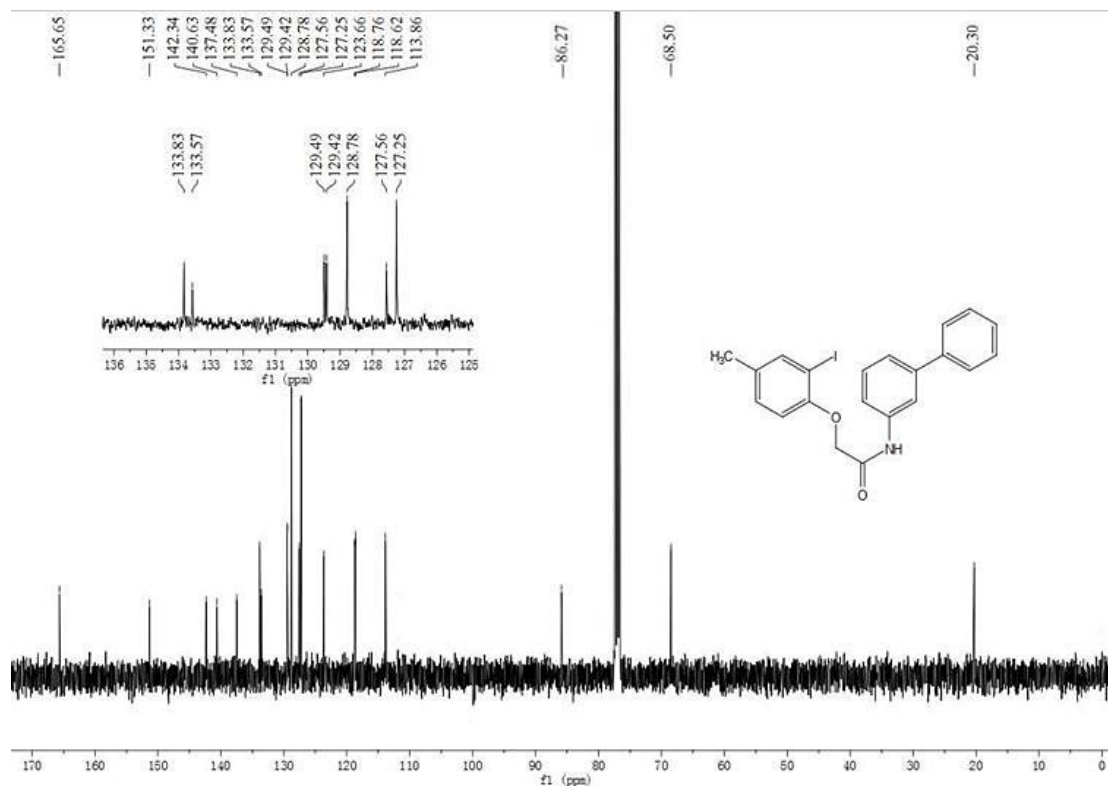

NMR spectra of **1e**

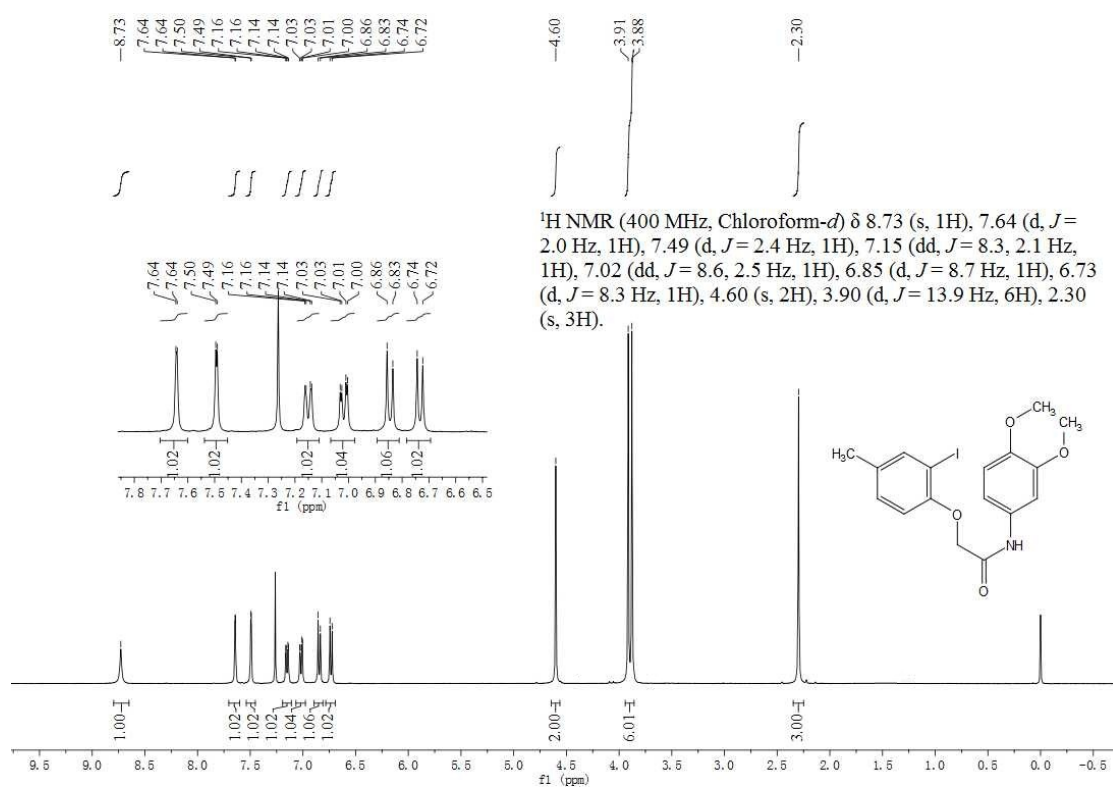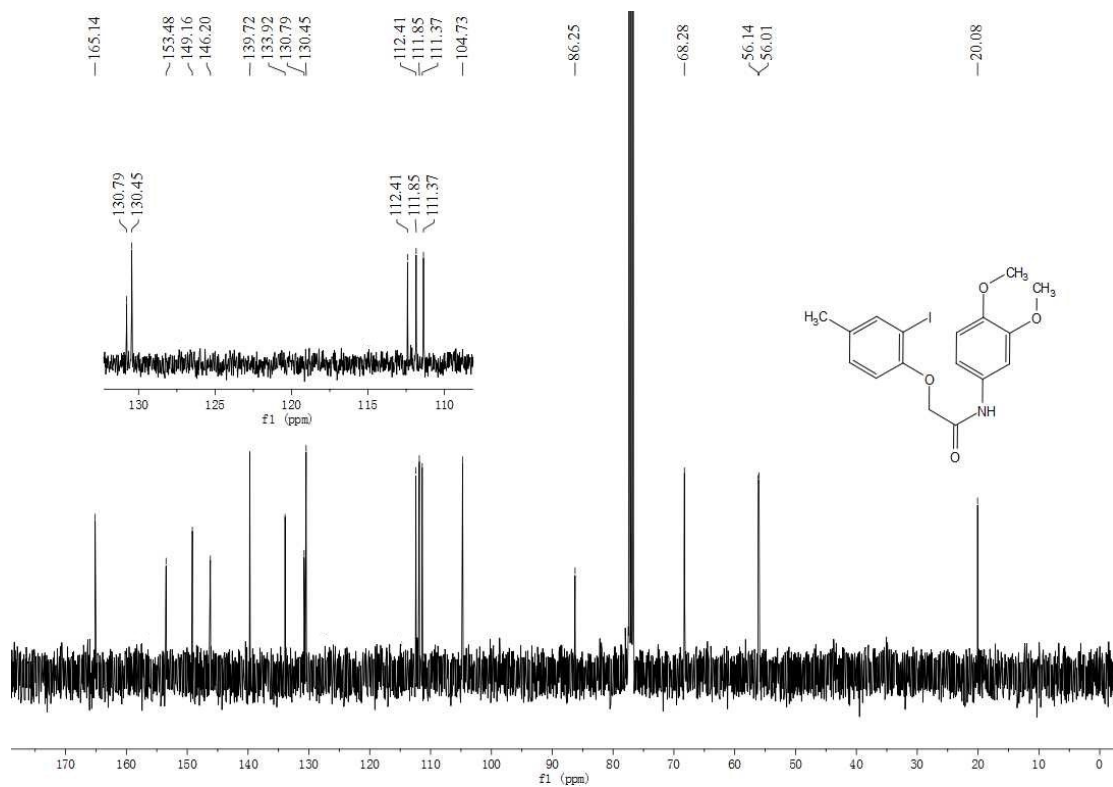



NMR spectra of **1f**

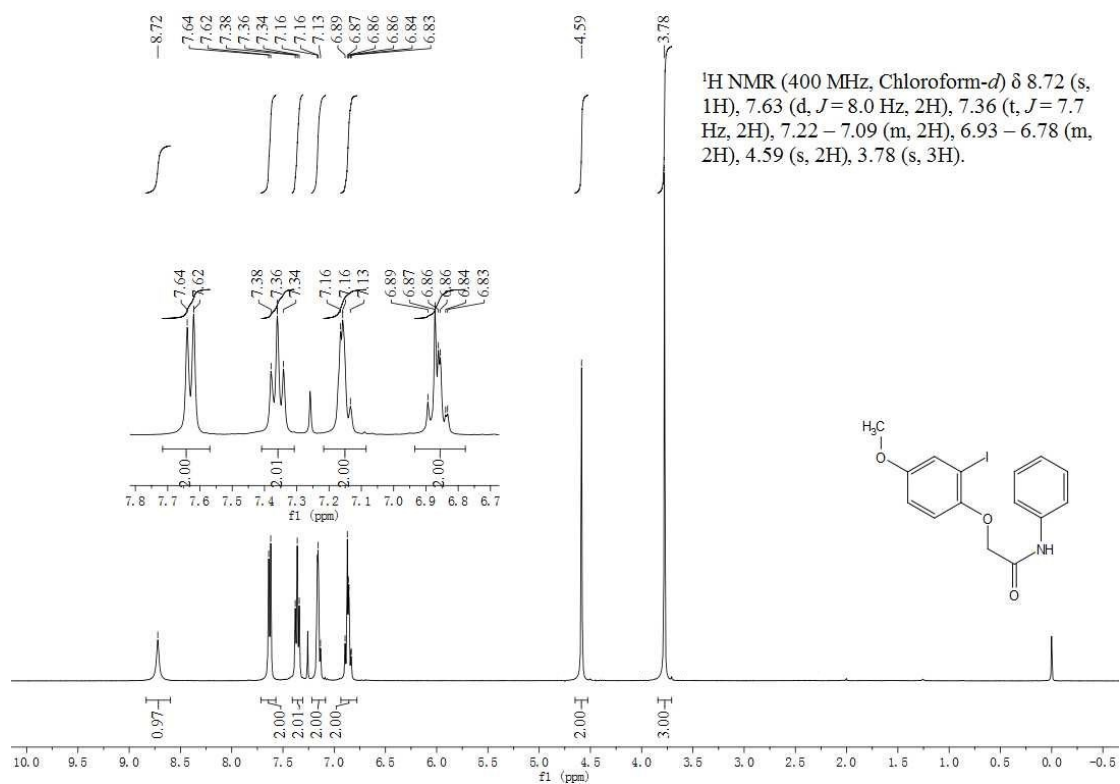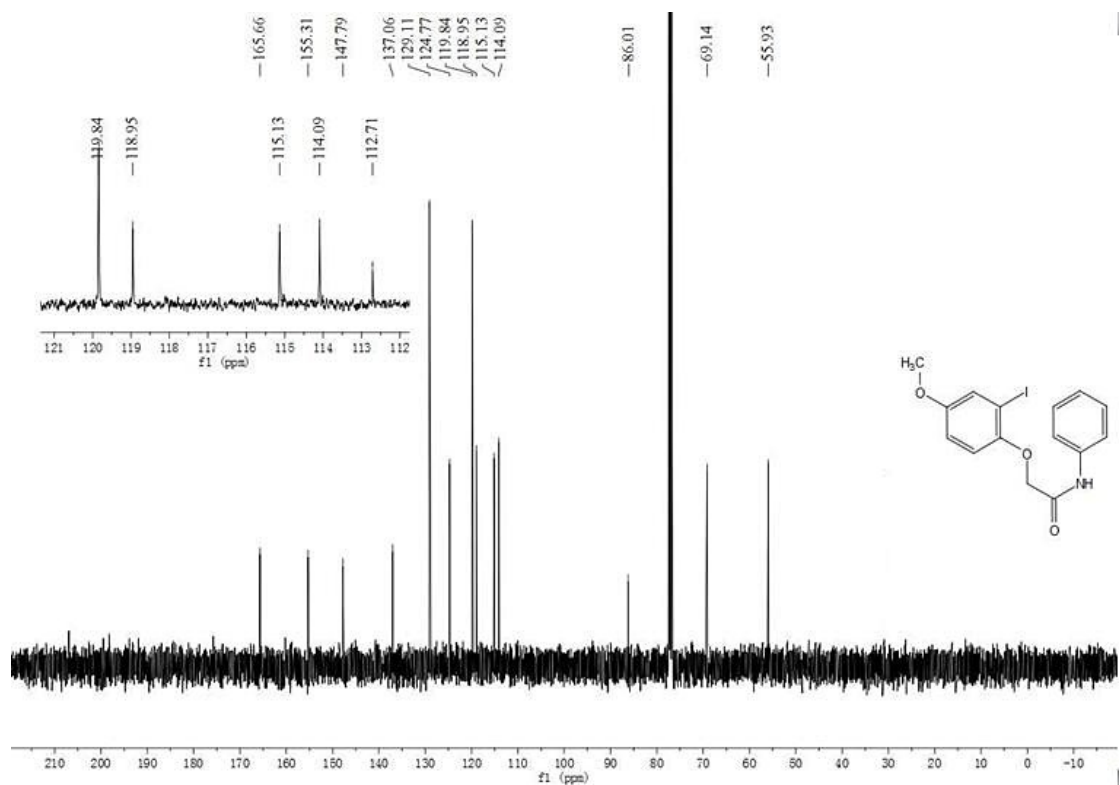

NMR spectra of **1g**

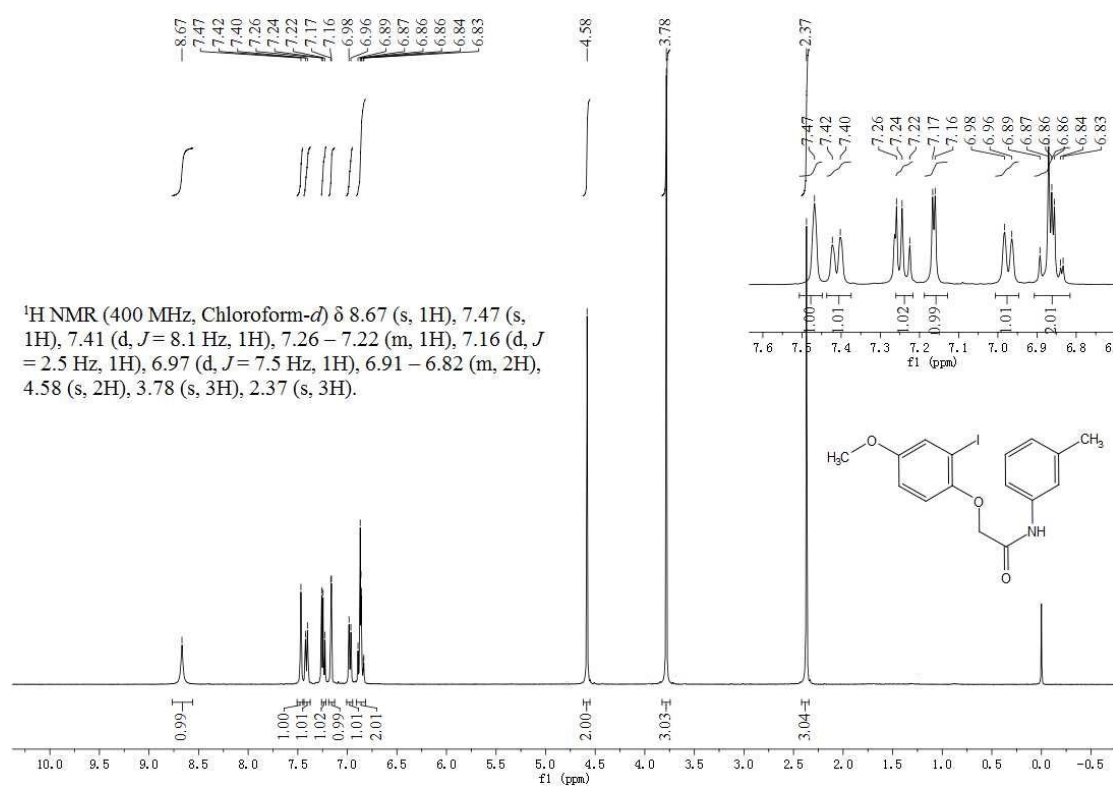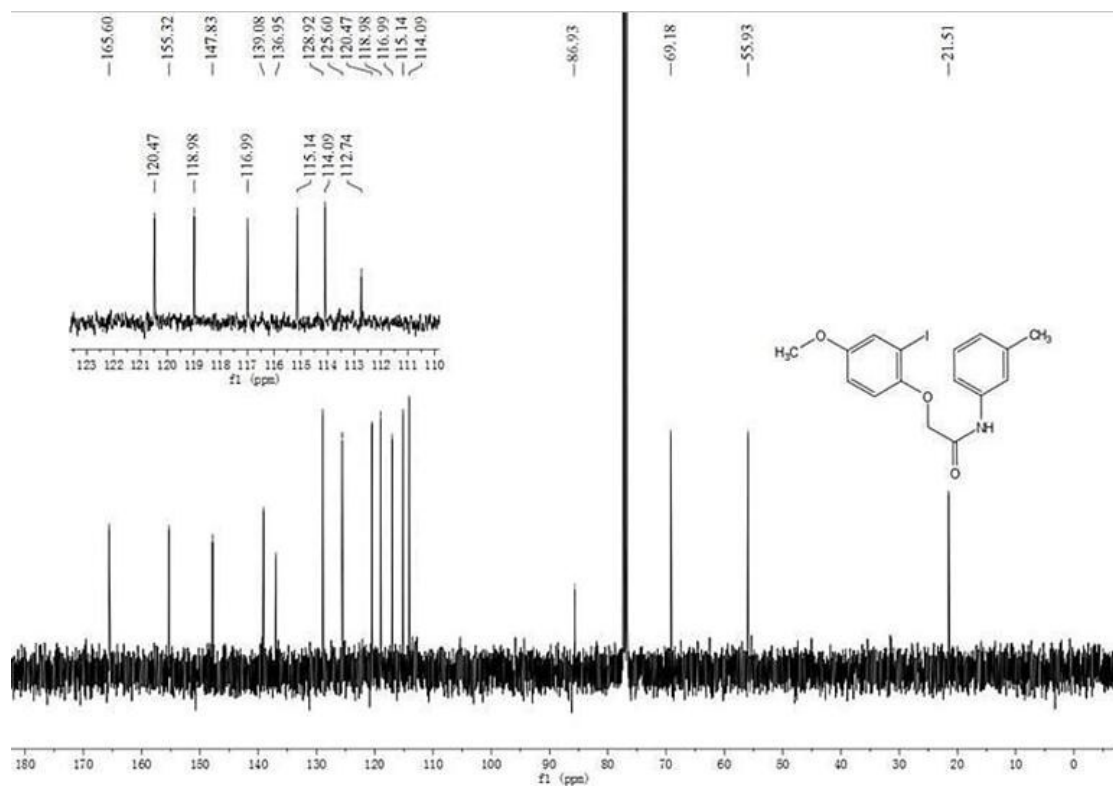

NMR spectra of **1h**

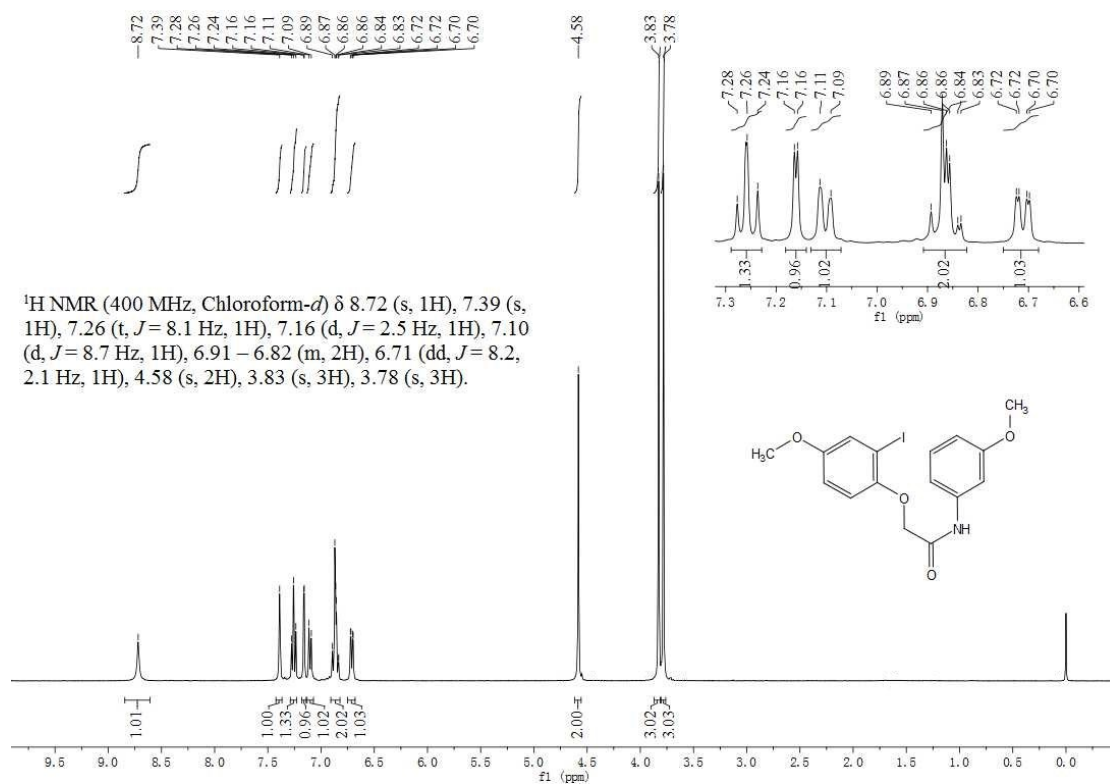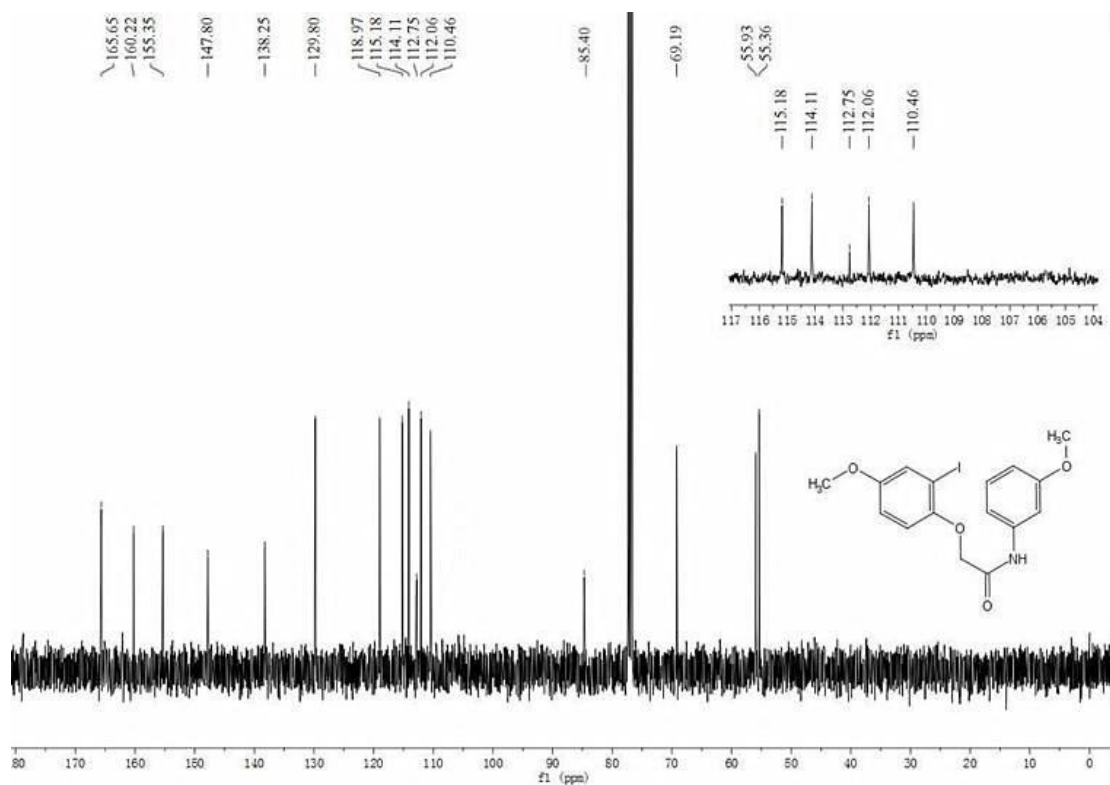

NMR spectra of **1i**

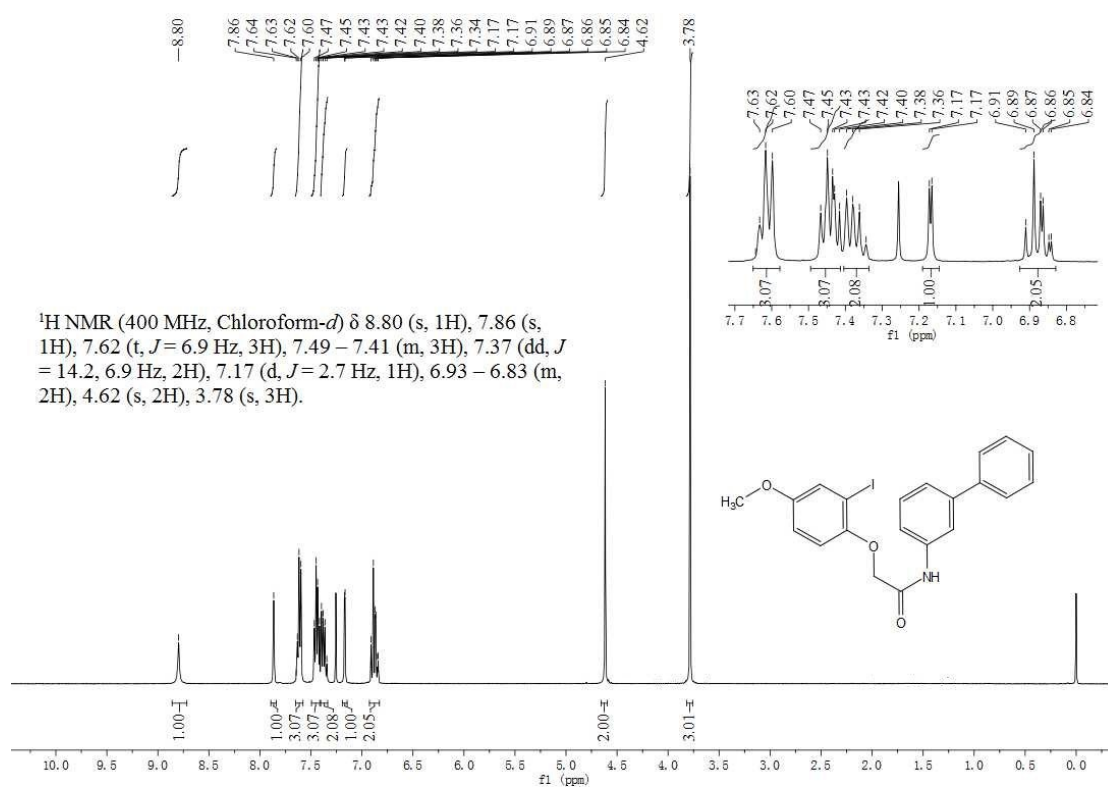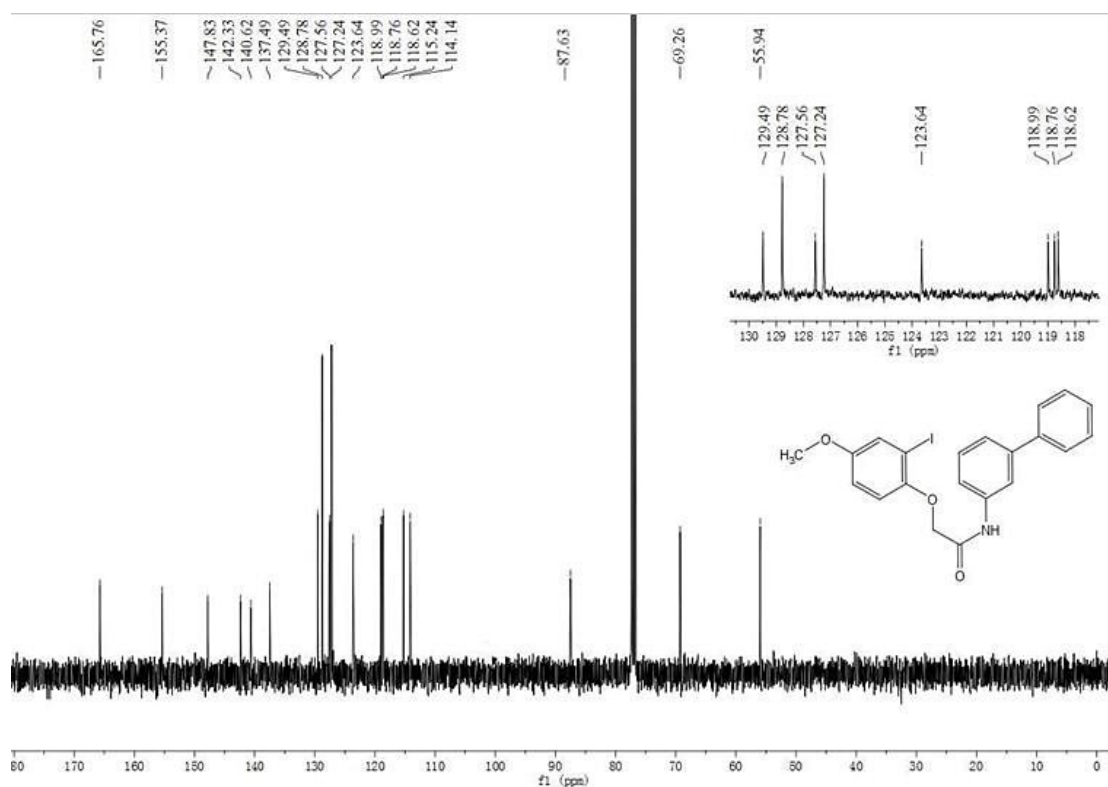

NMR spectra of **1j**

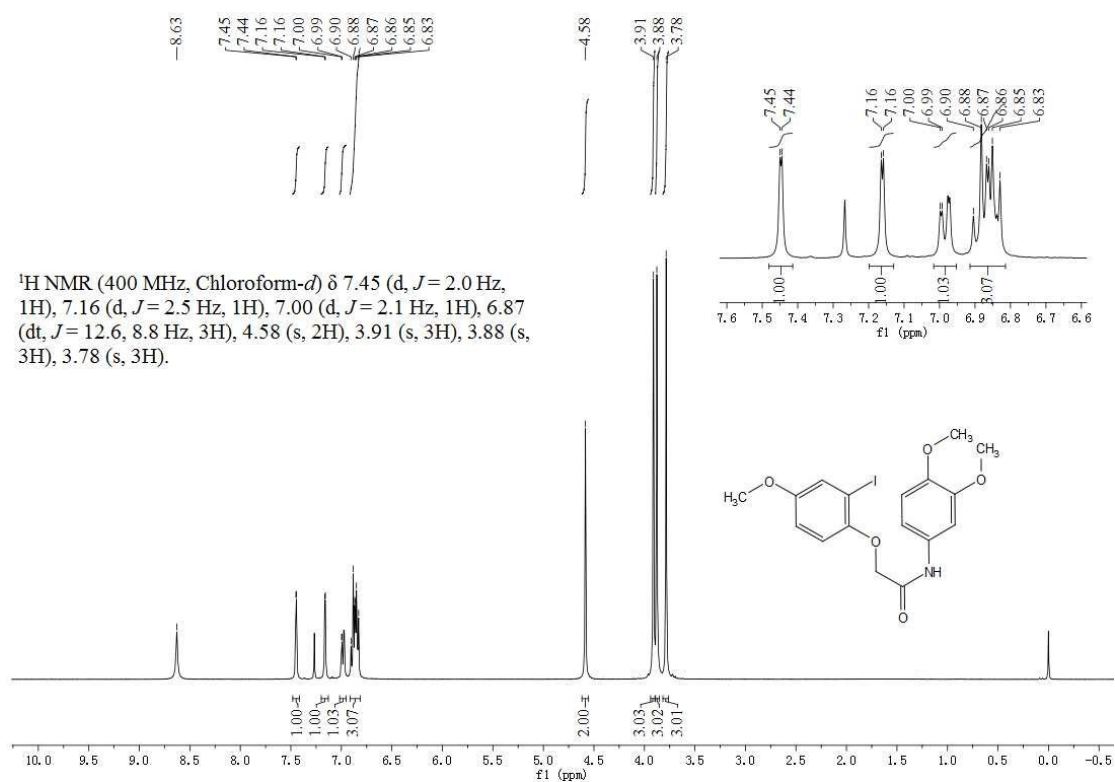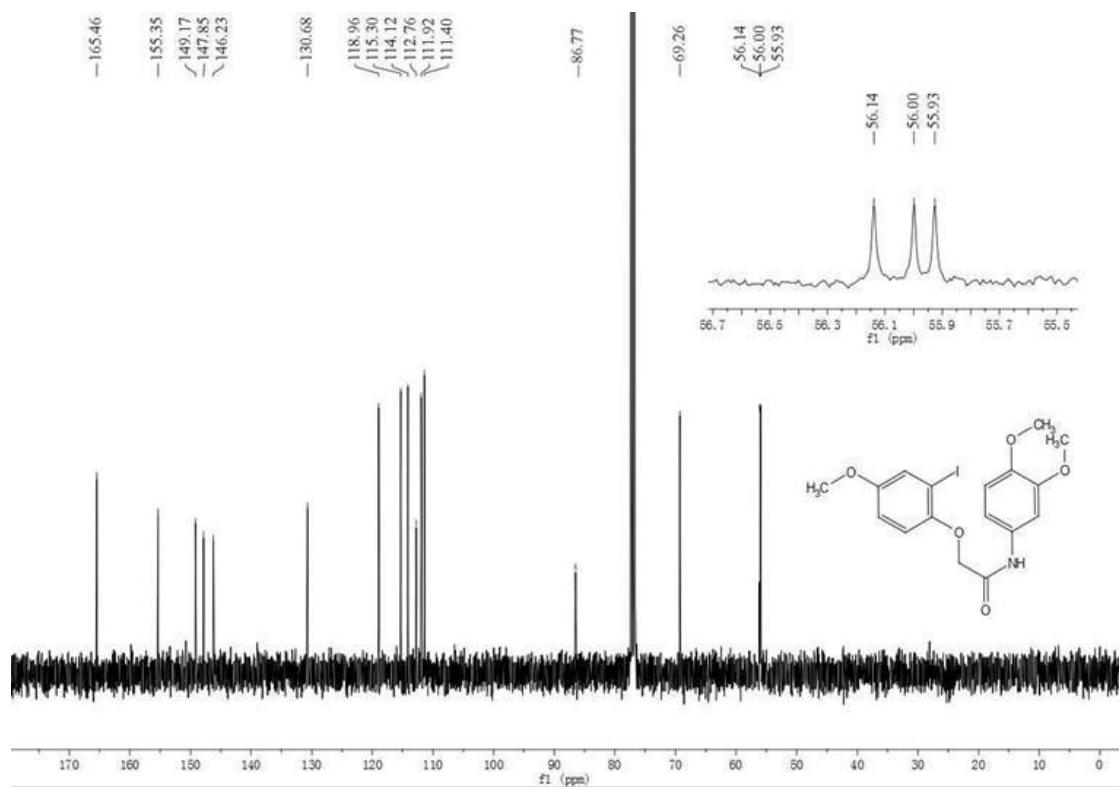

NMR spectra of **1k**

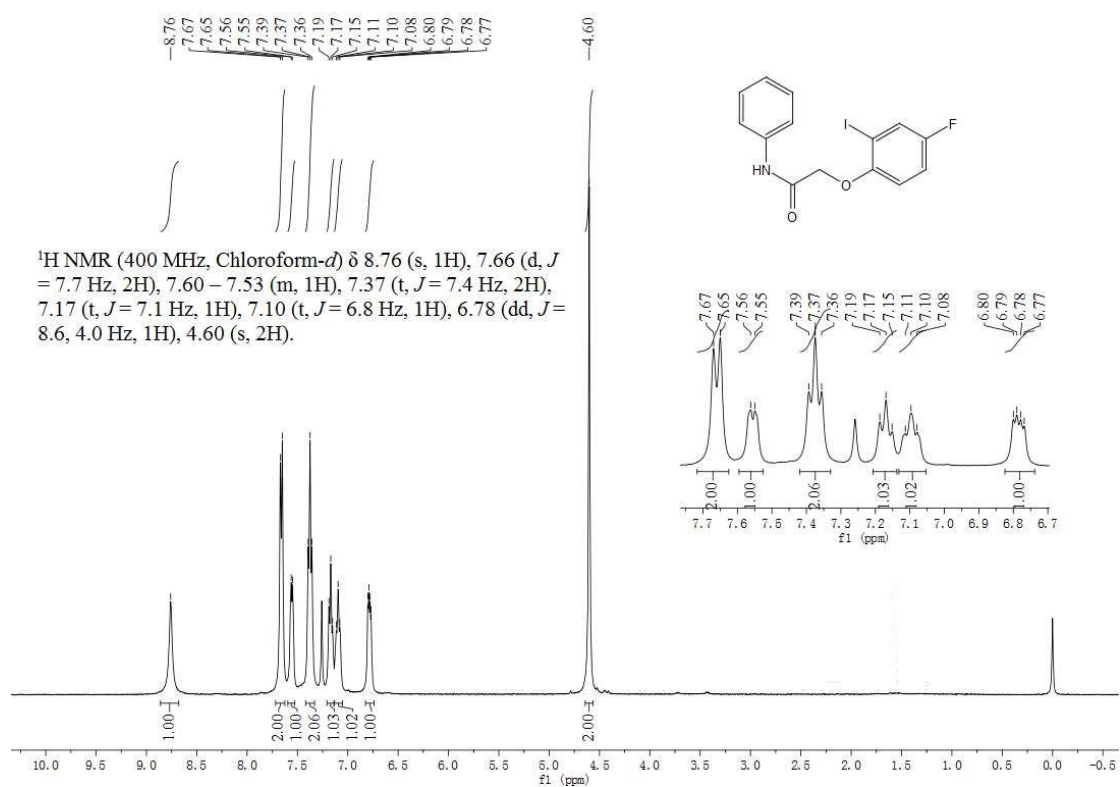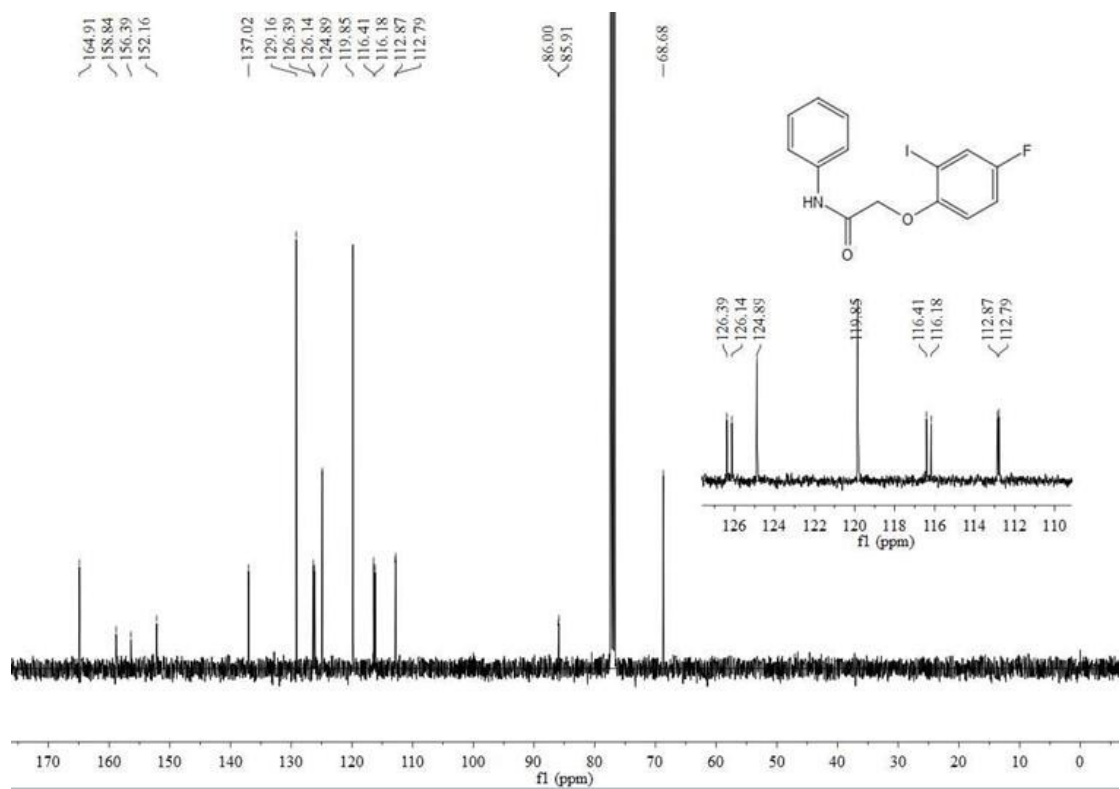

NMR spectra of **11**

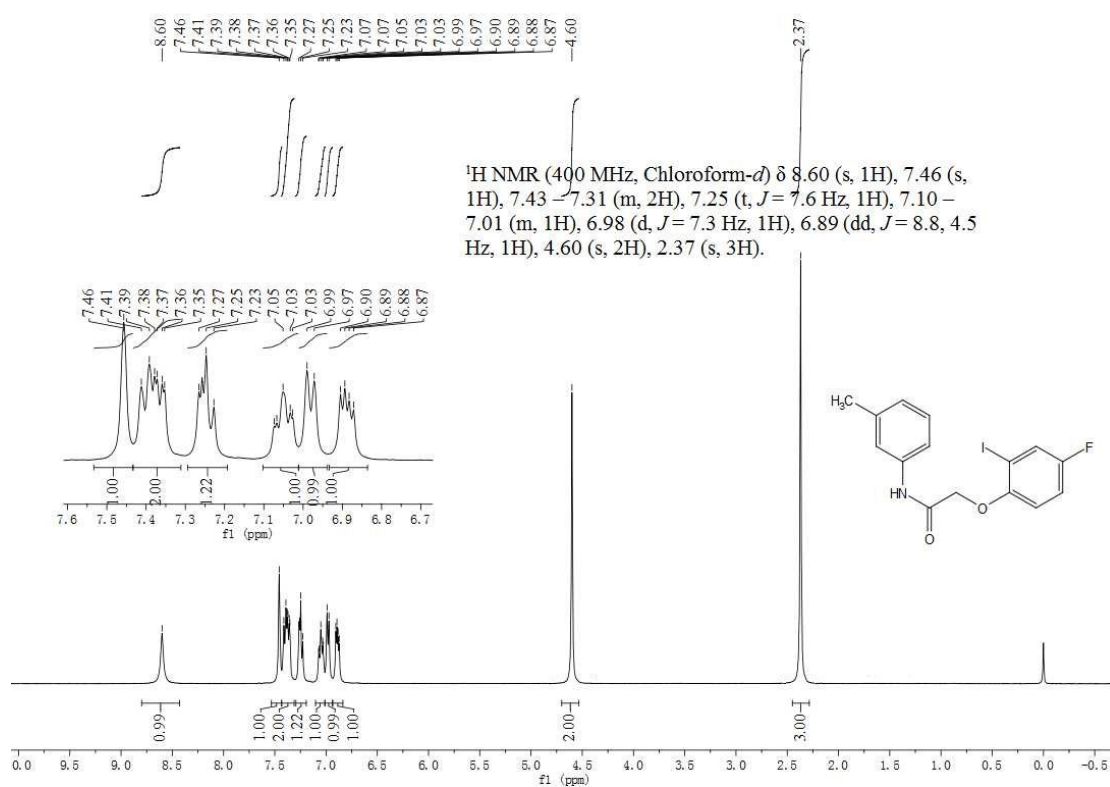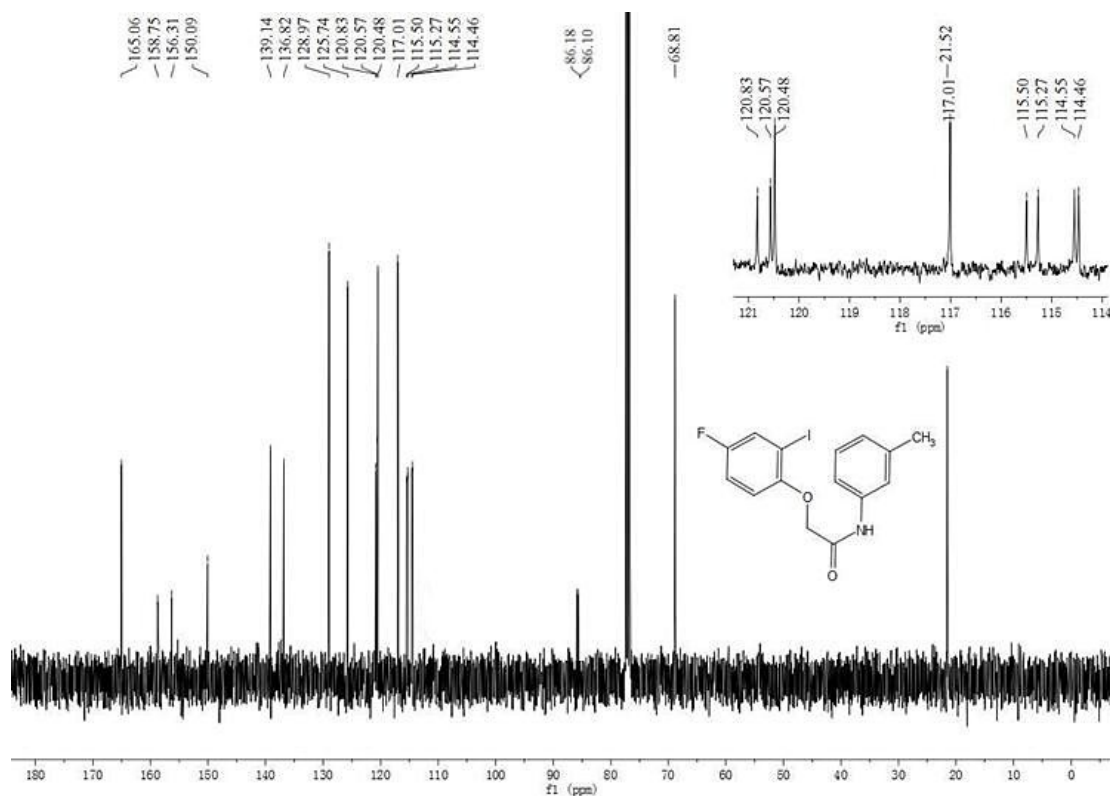

NMR spectra of **1m**

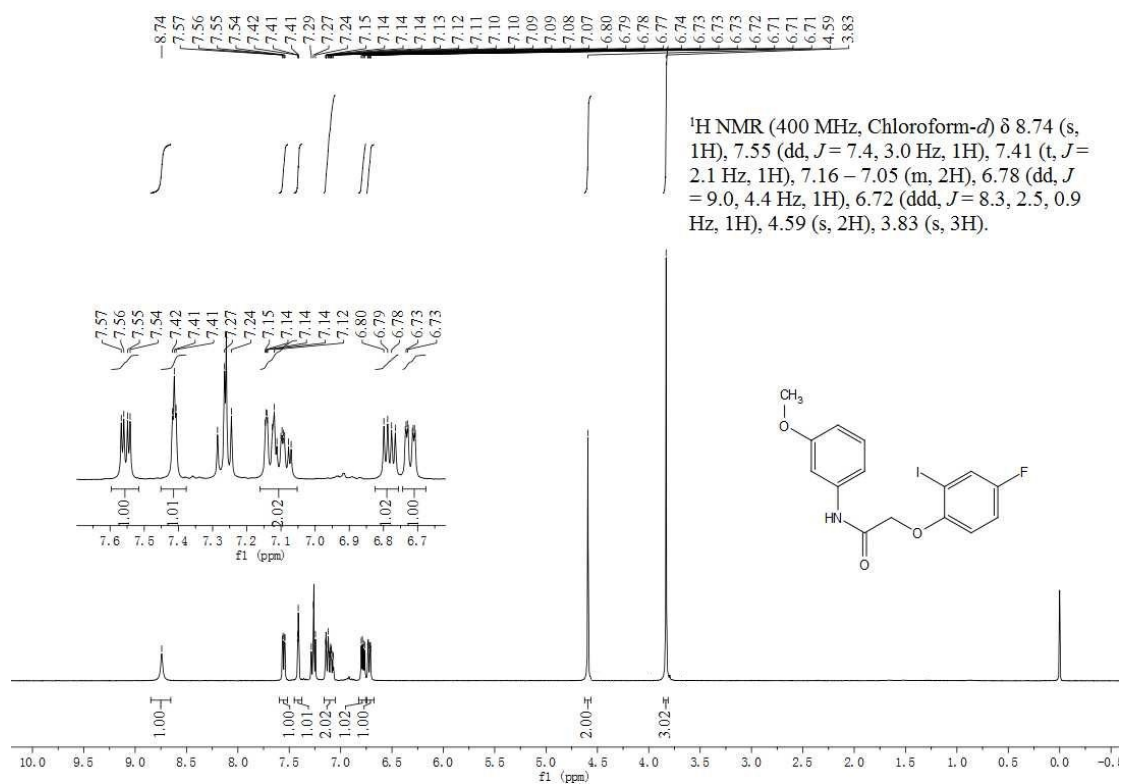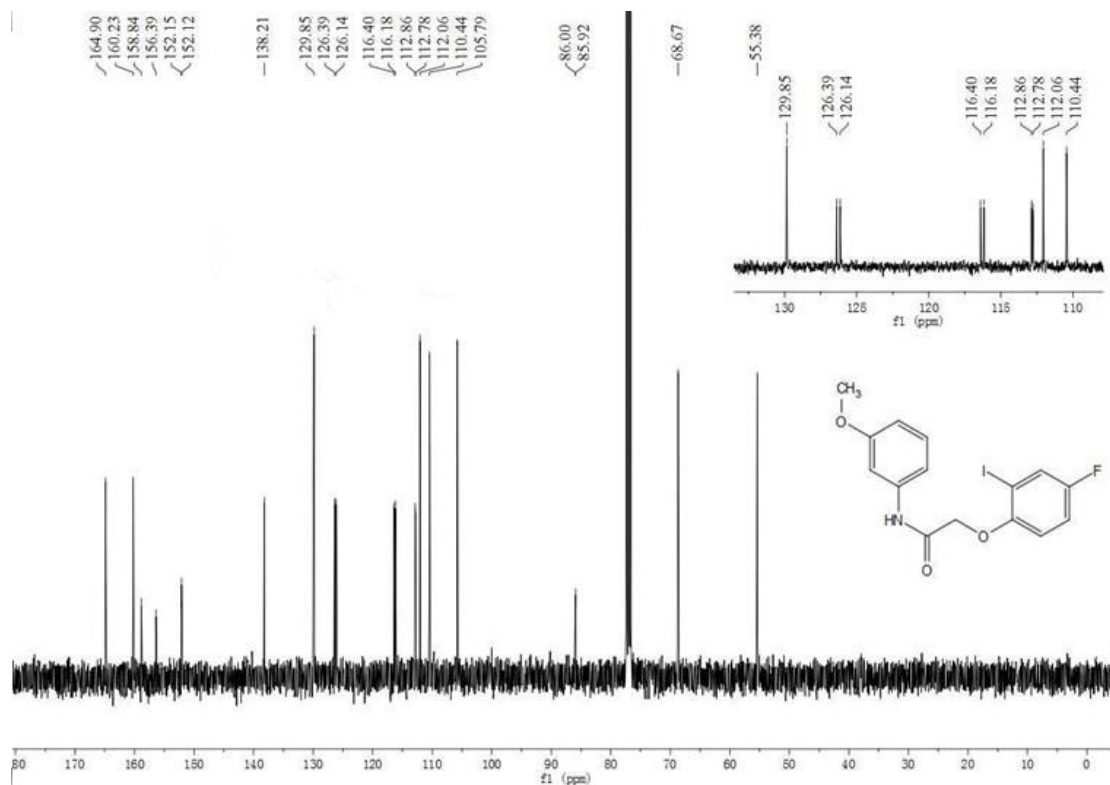



NMR spectra of **1n**

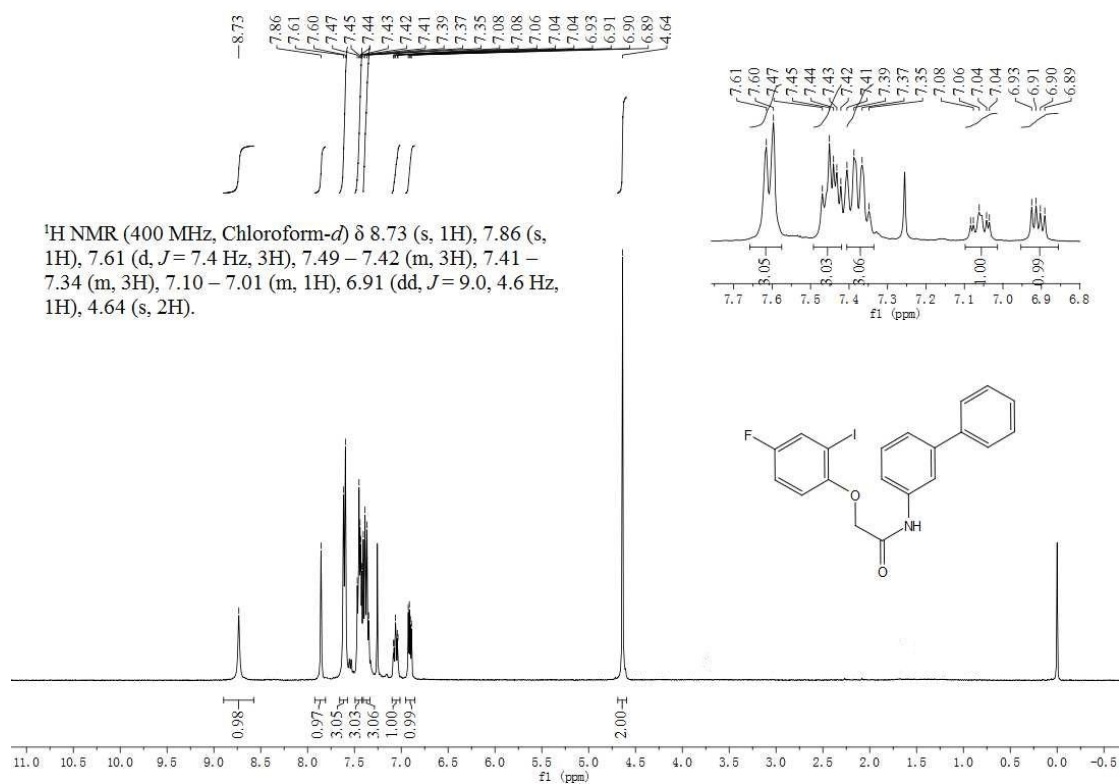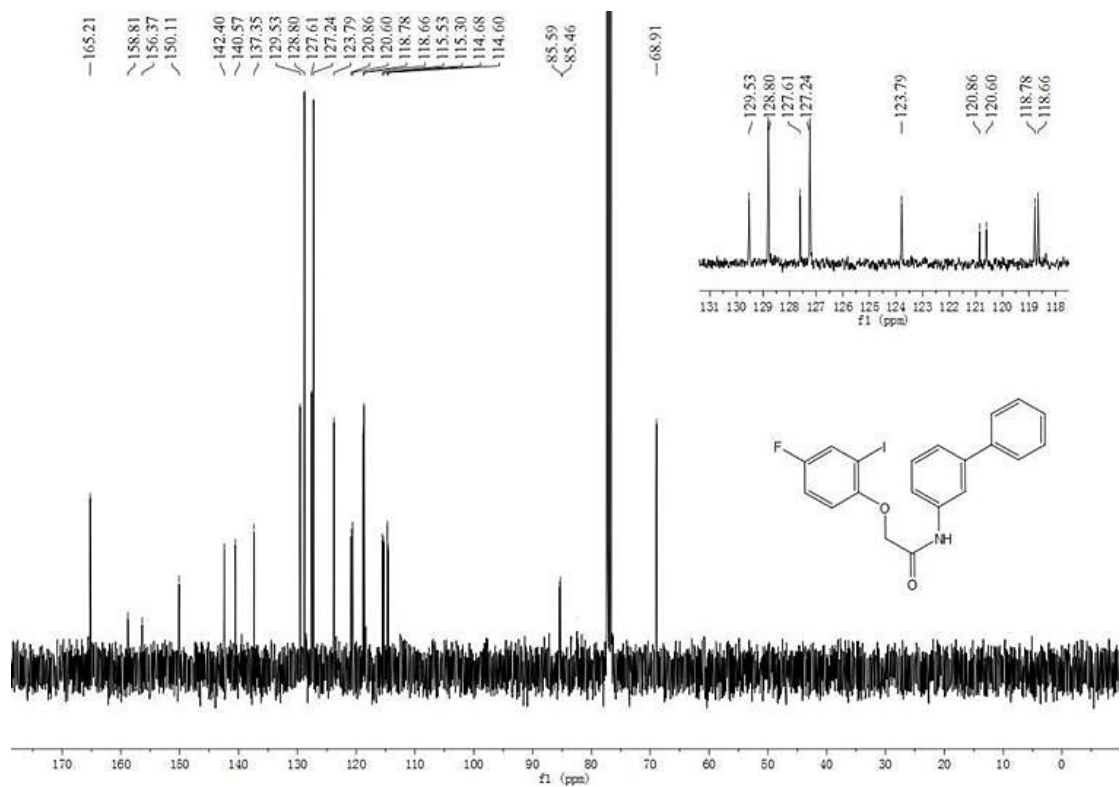

NMR spectra of **1o**

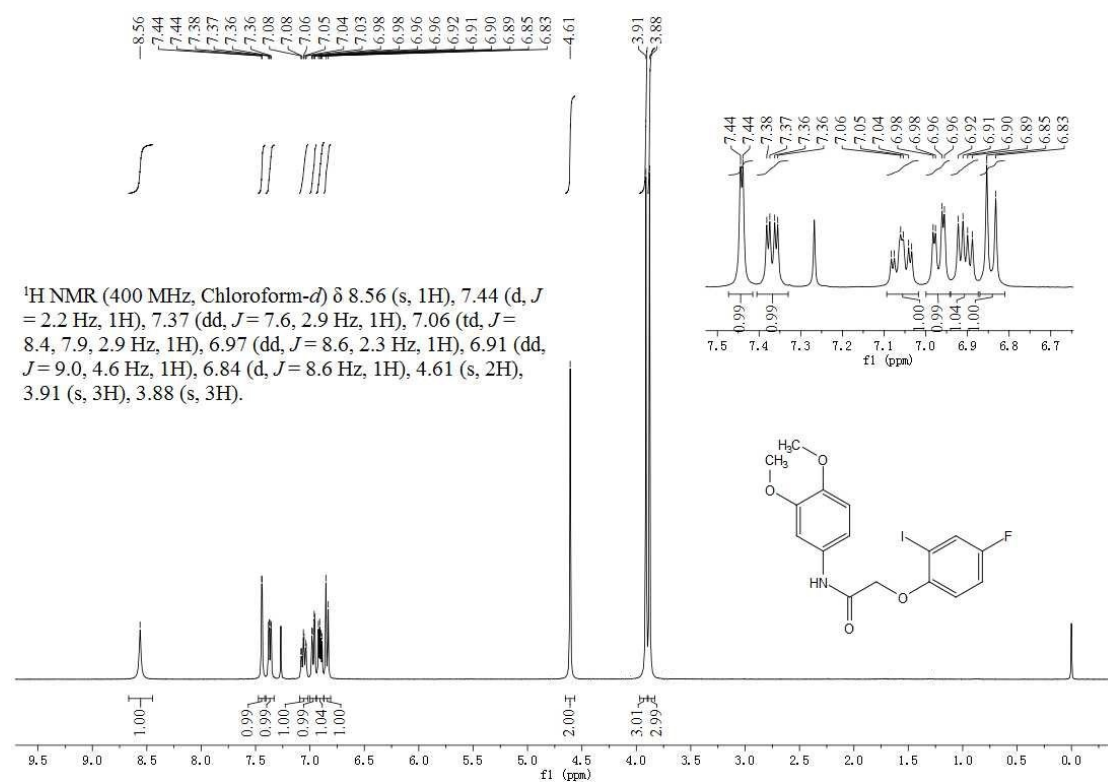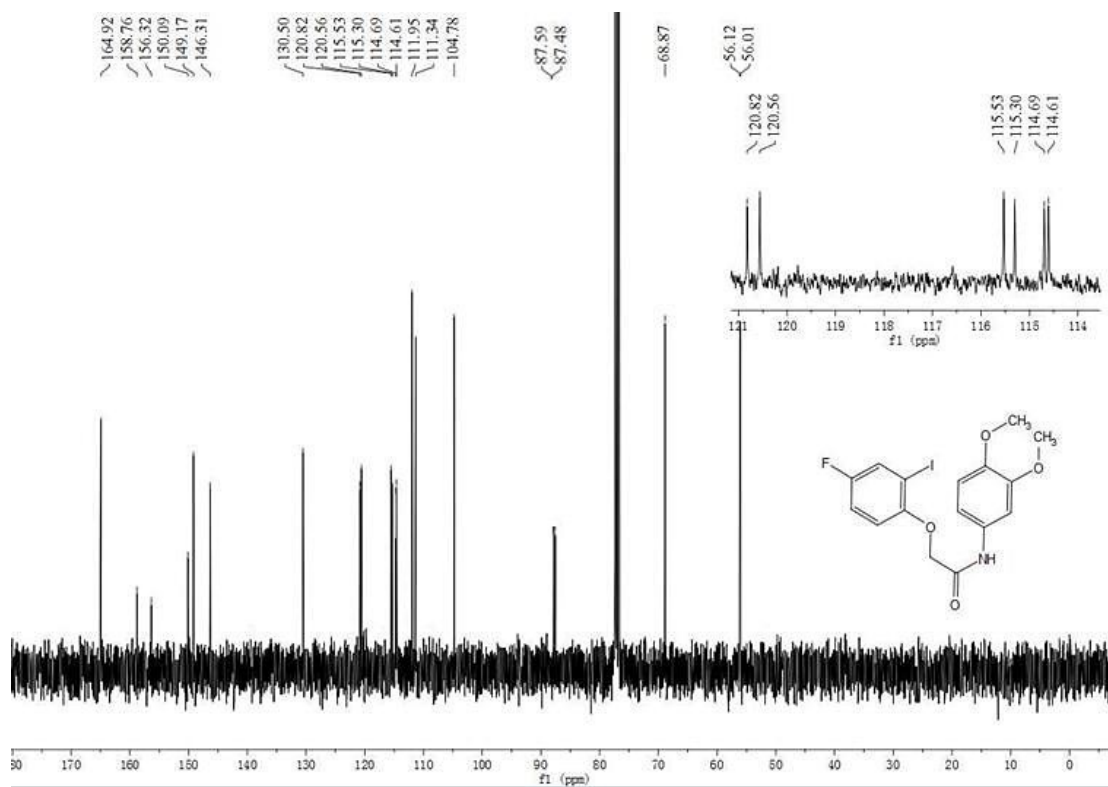

NMR spectra of **1p**

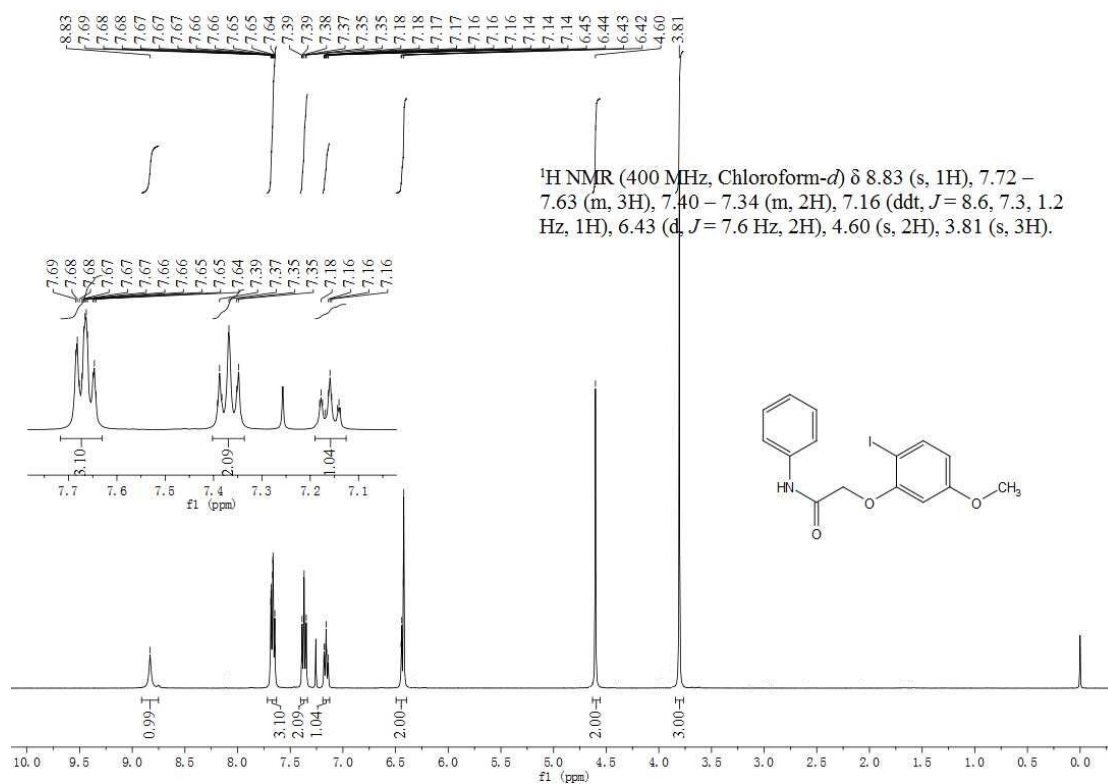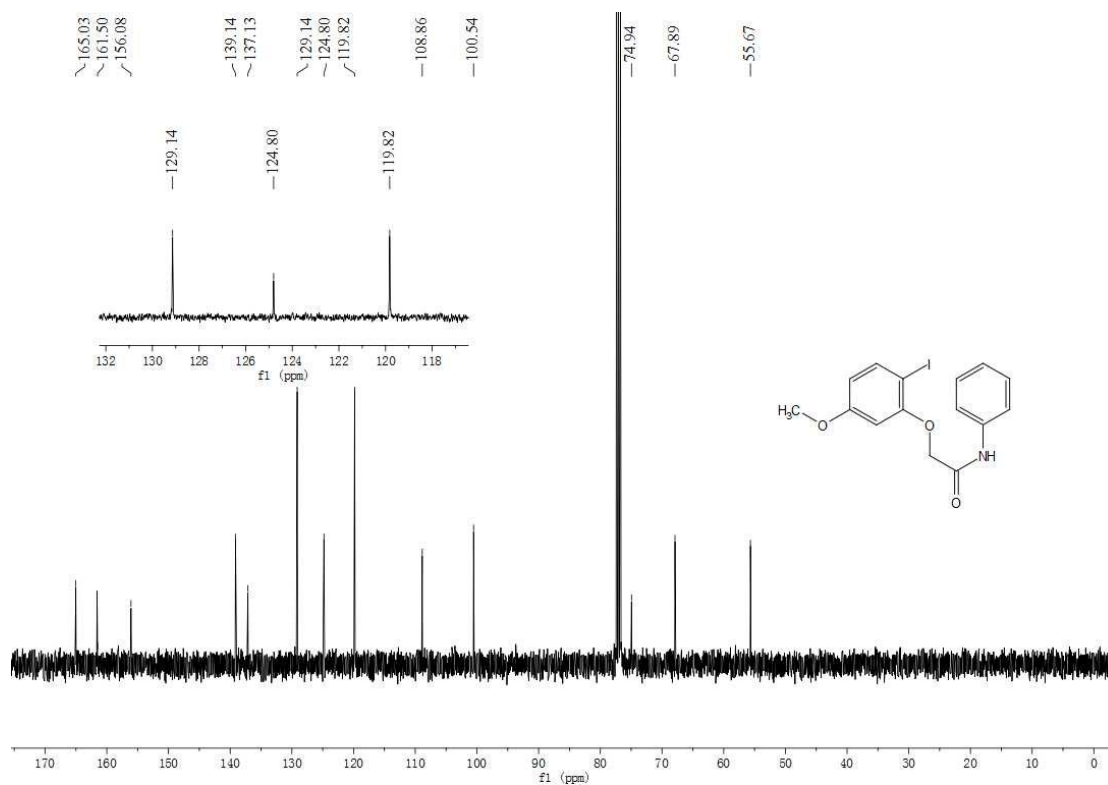

NMR spectra of **1q**

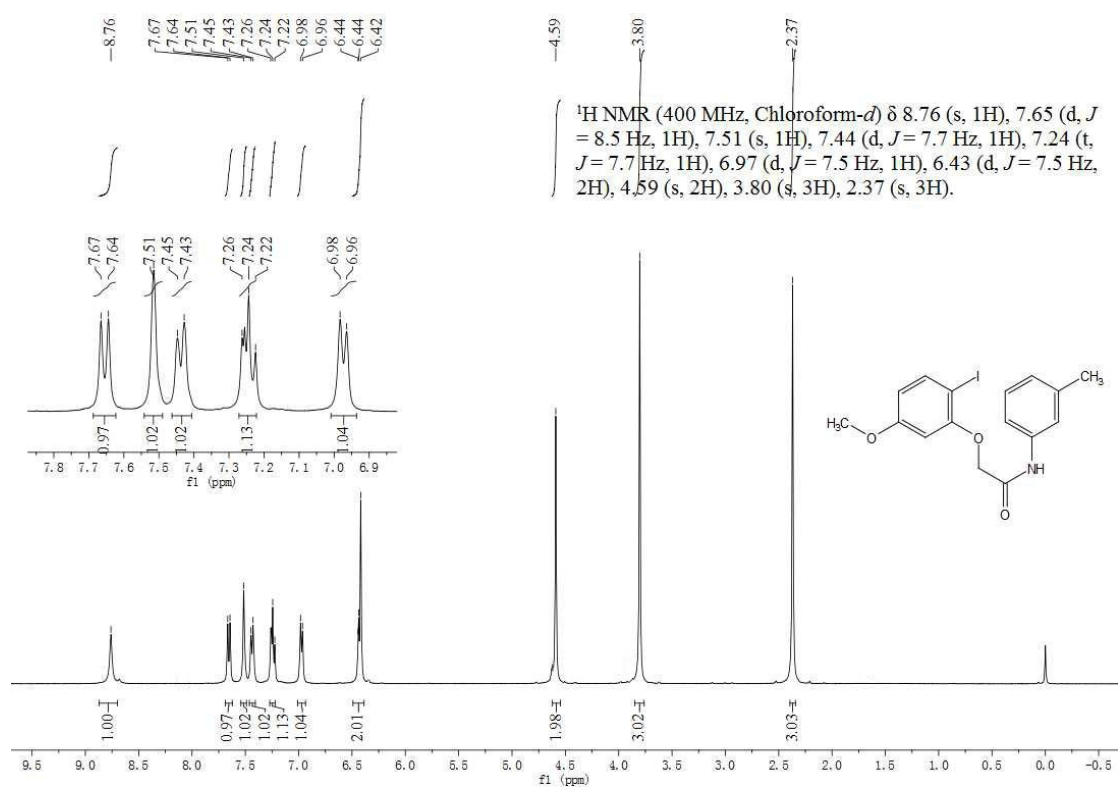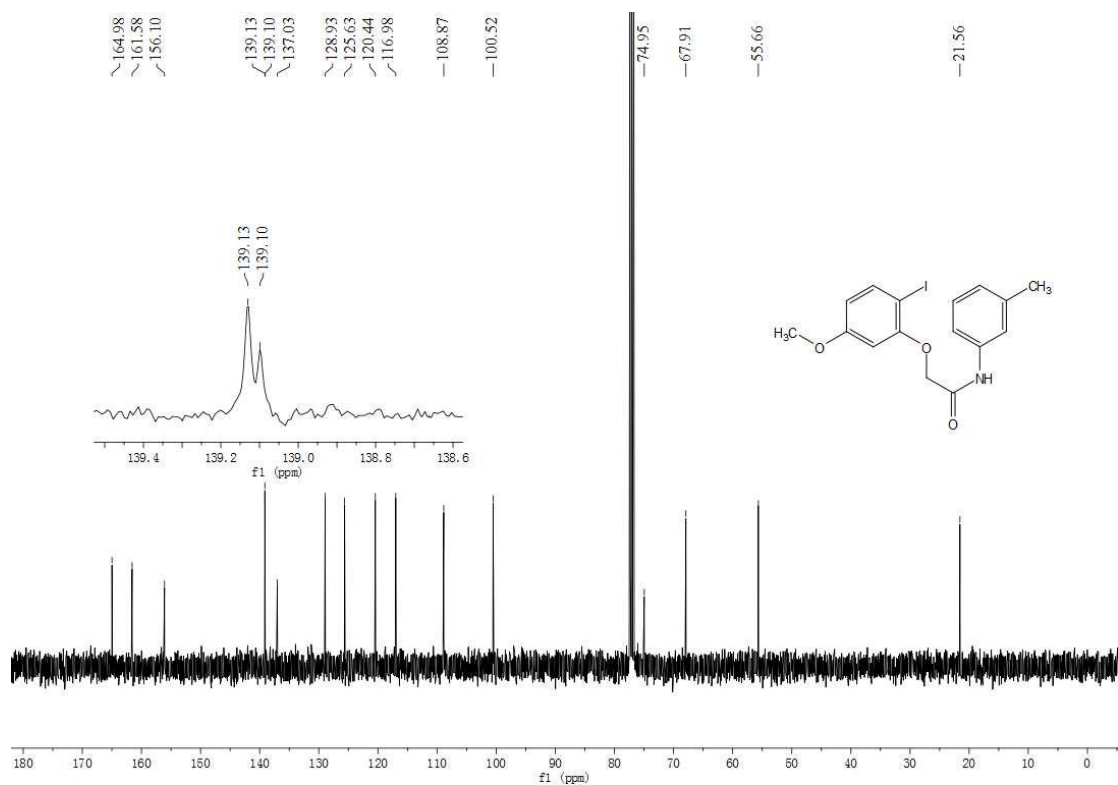

NMR spectra of **1r**

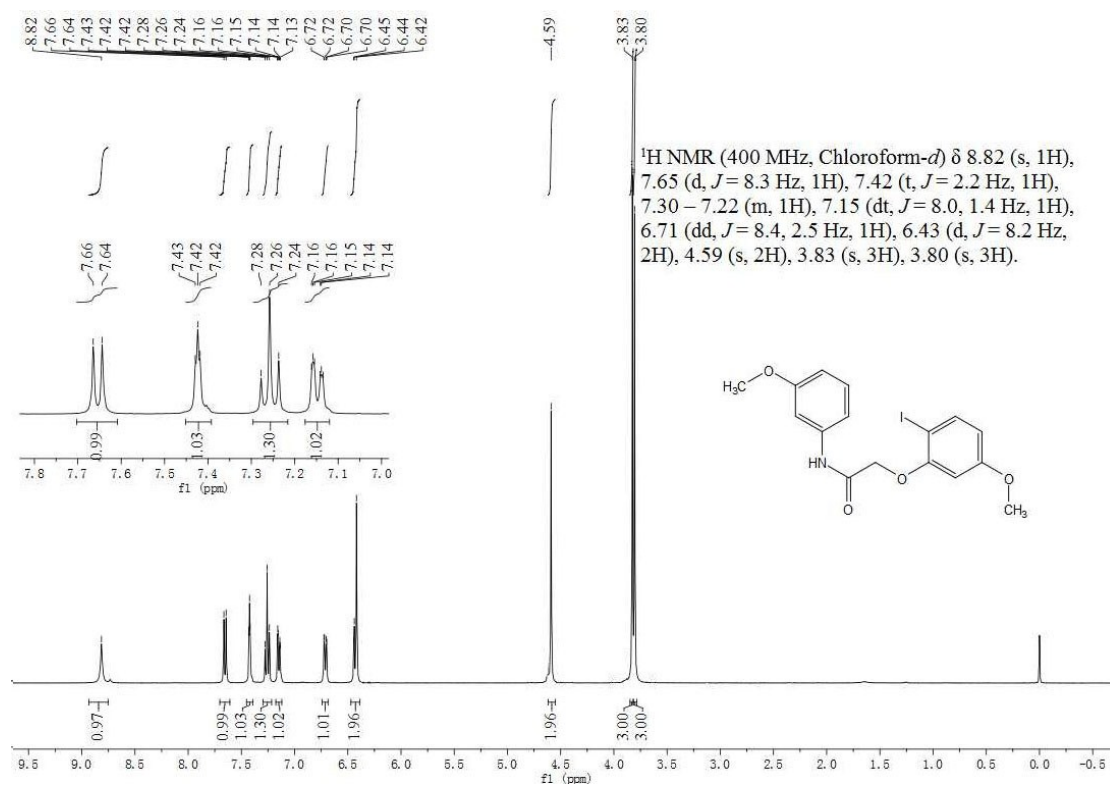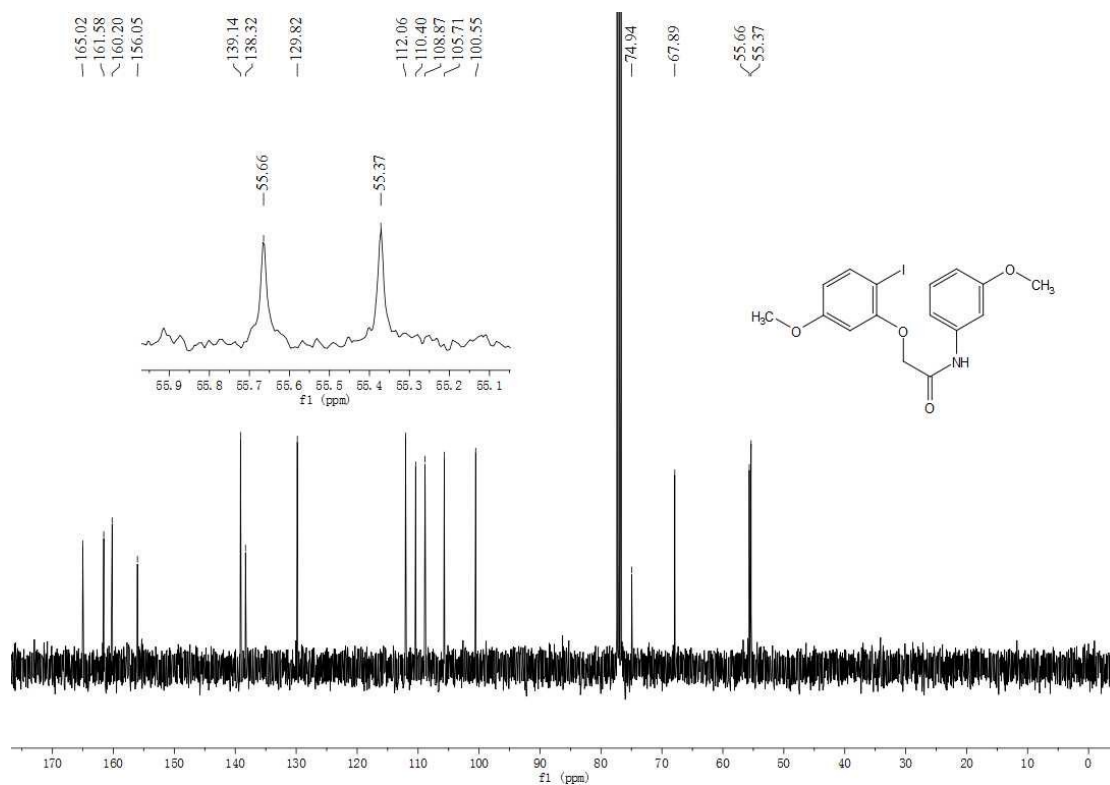

NMR spectra of **1s**

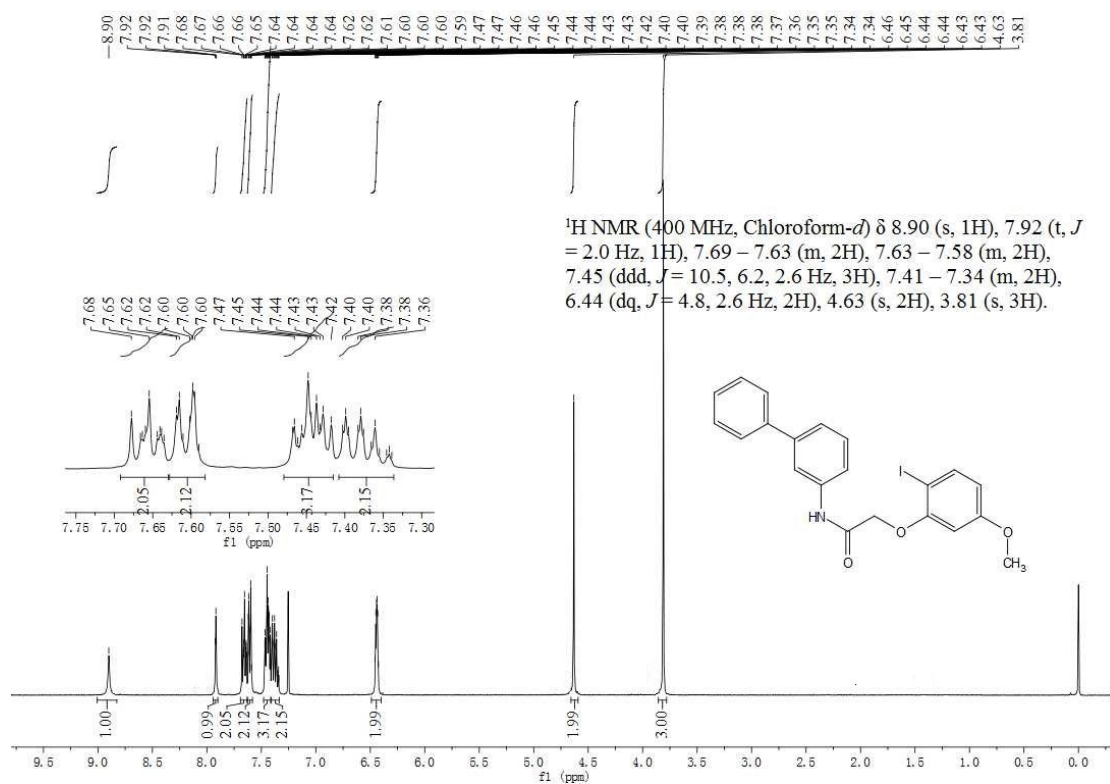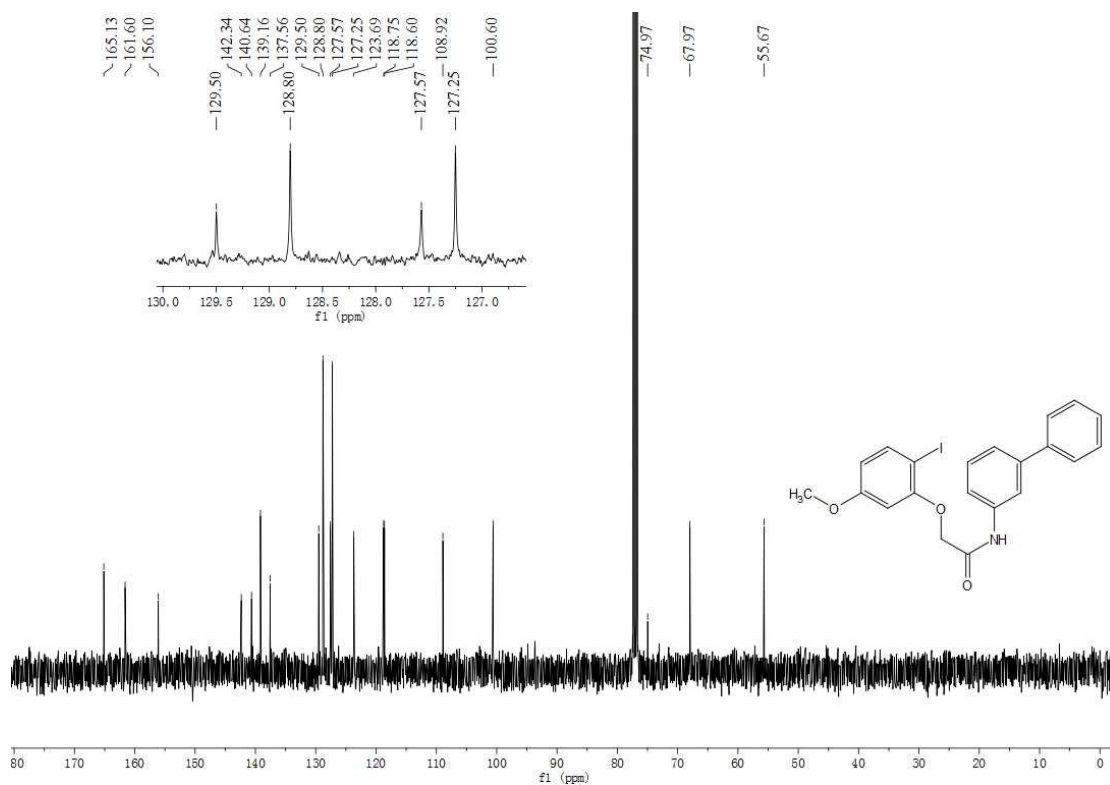

NMR spectra of **1t**

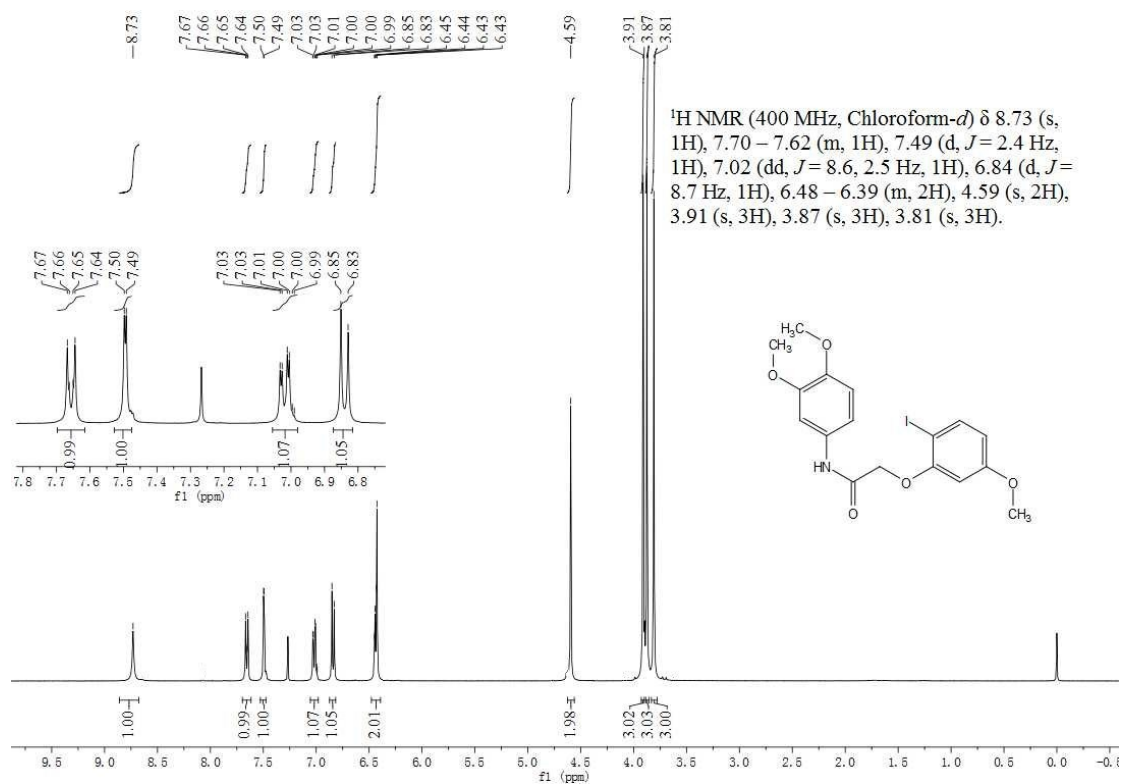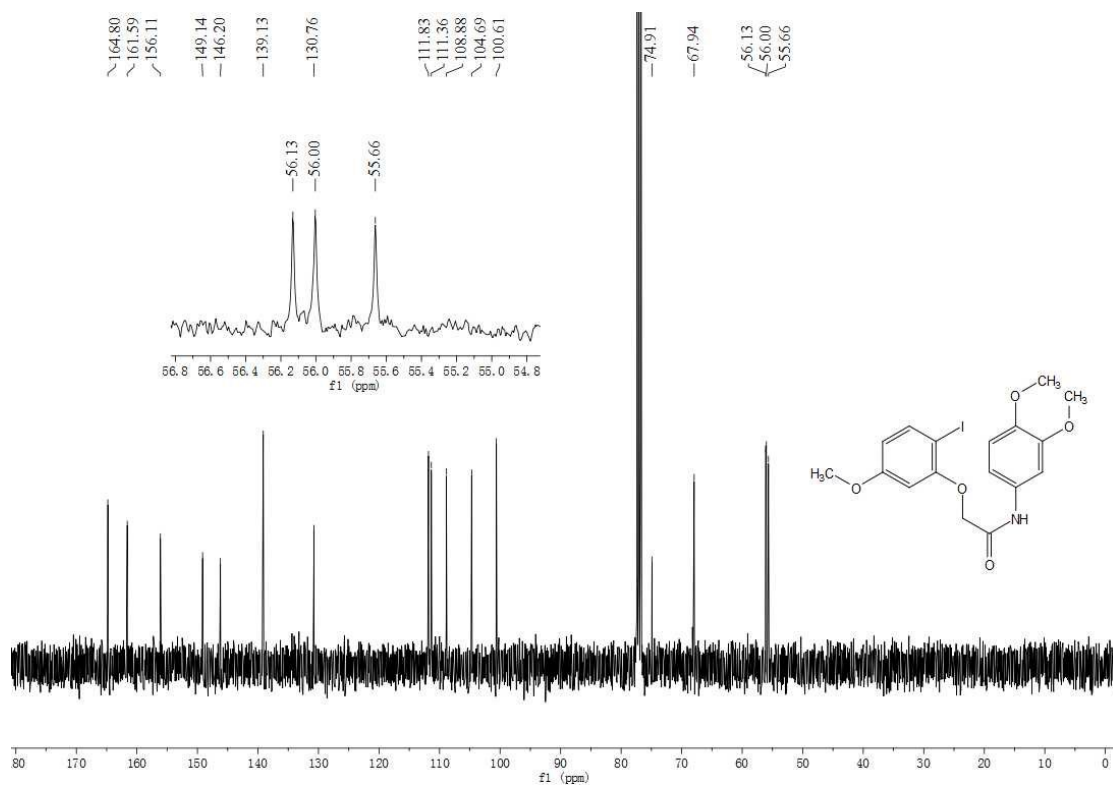

NMR spectra of **1u**

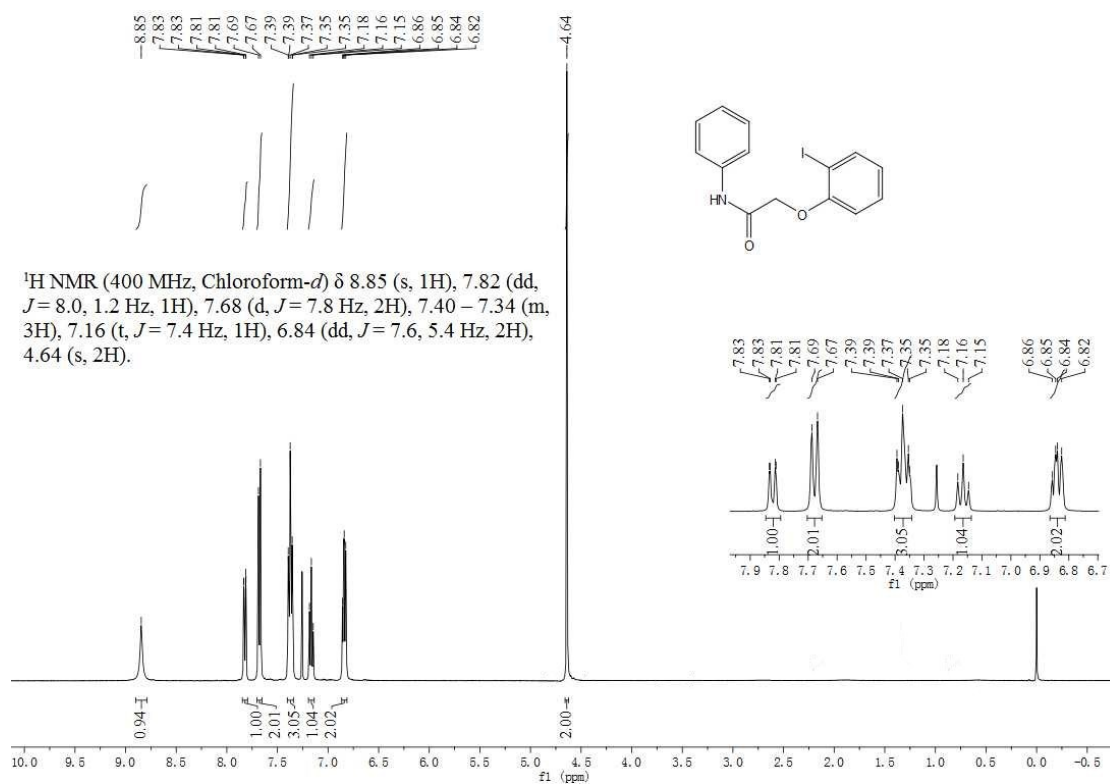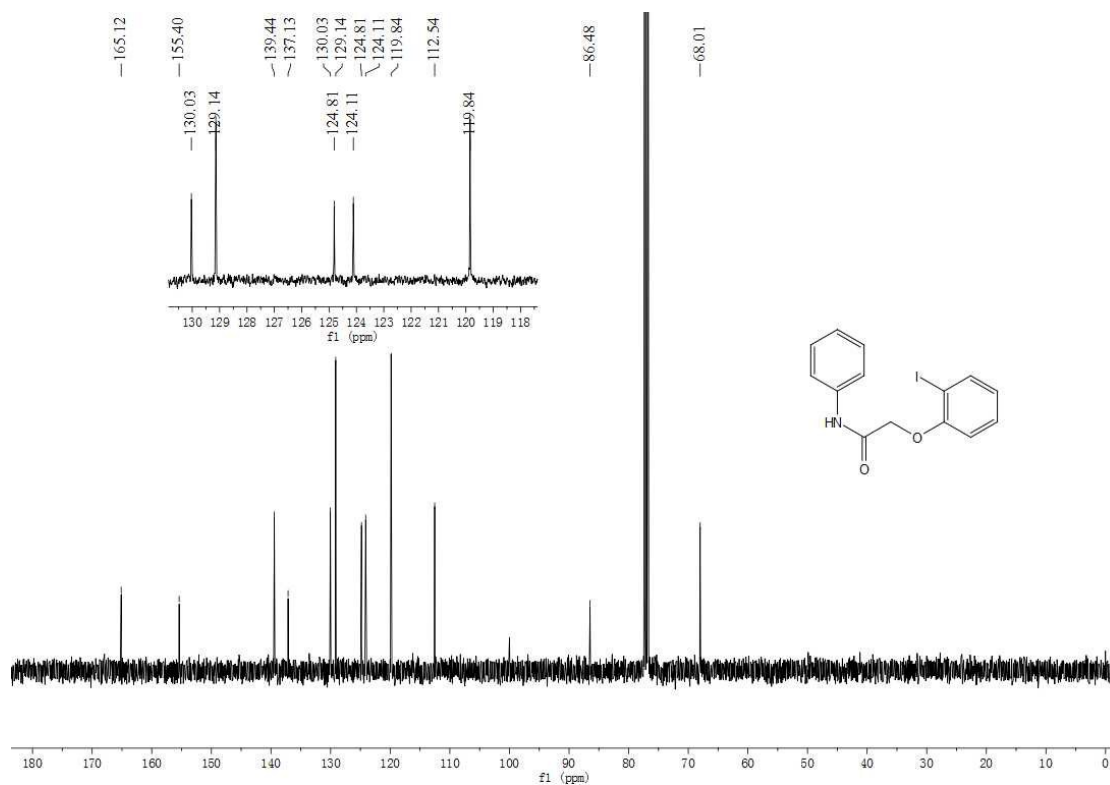



NMR spectra of 1v

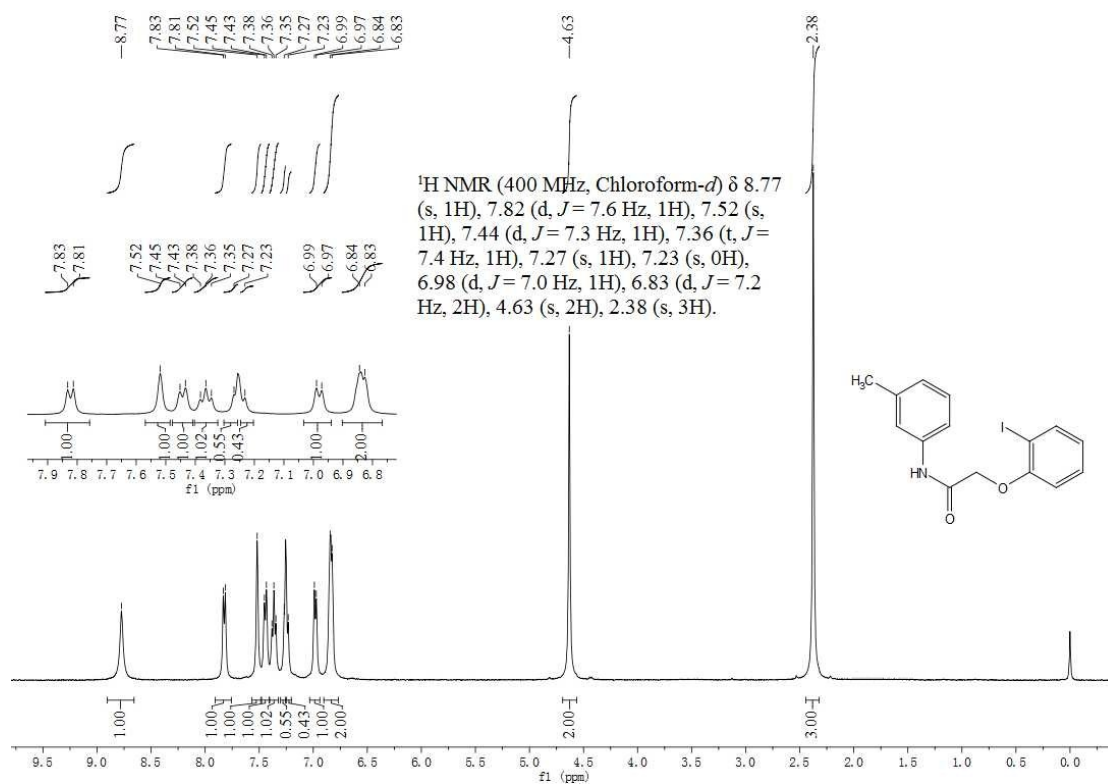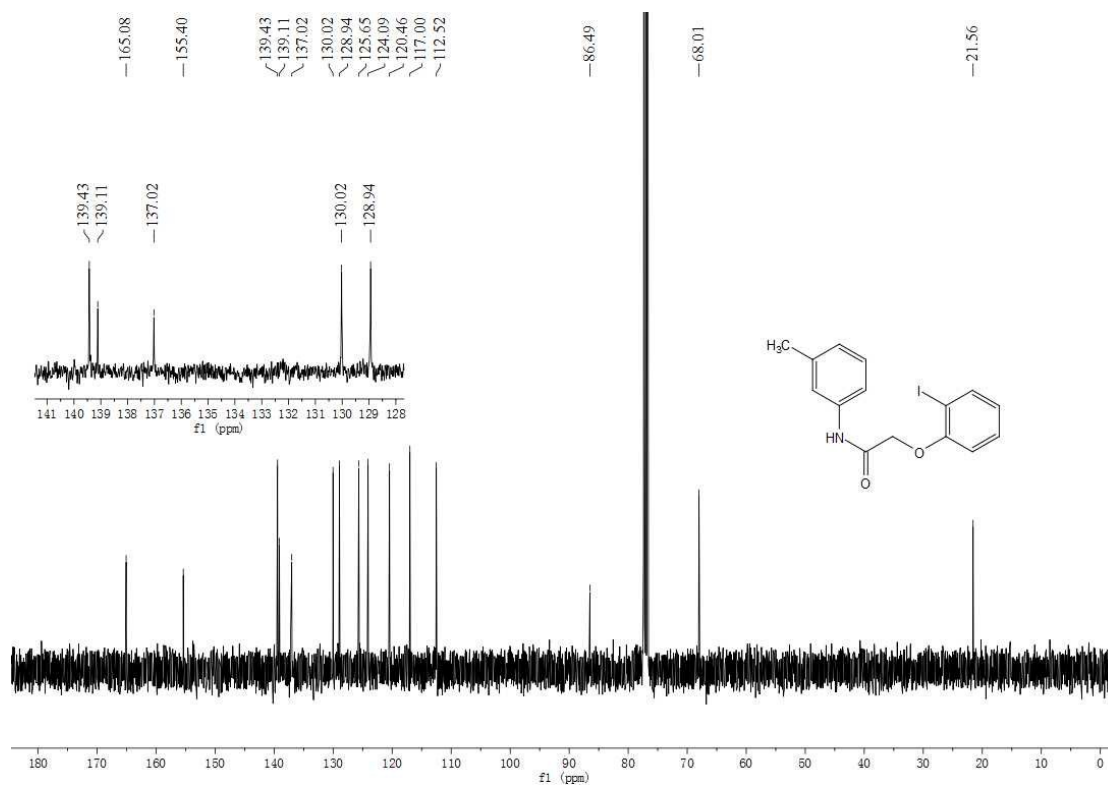

NMR spectra of **1w**

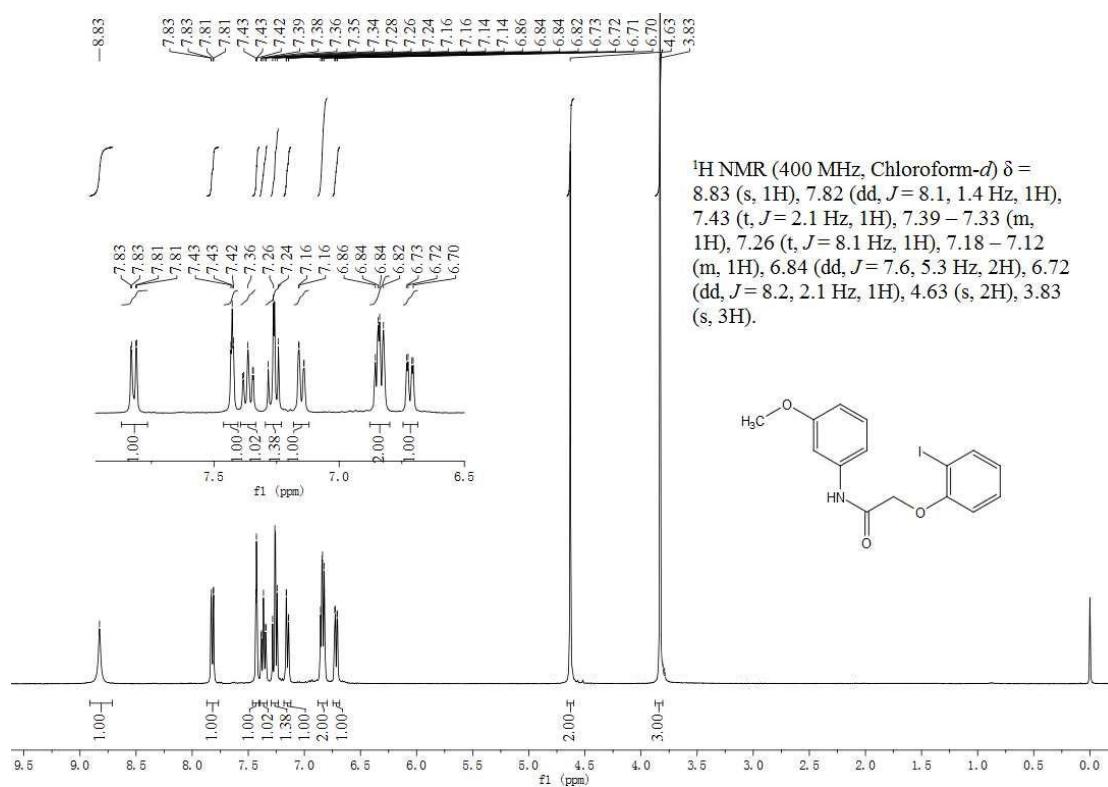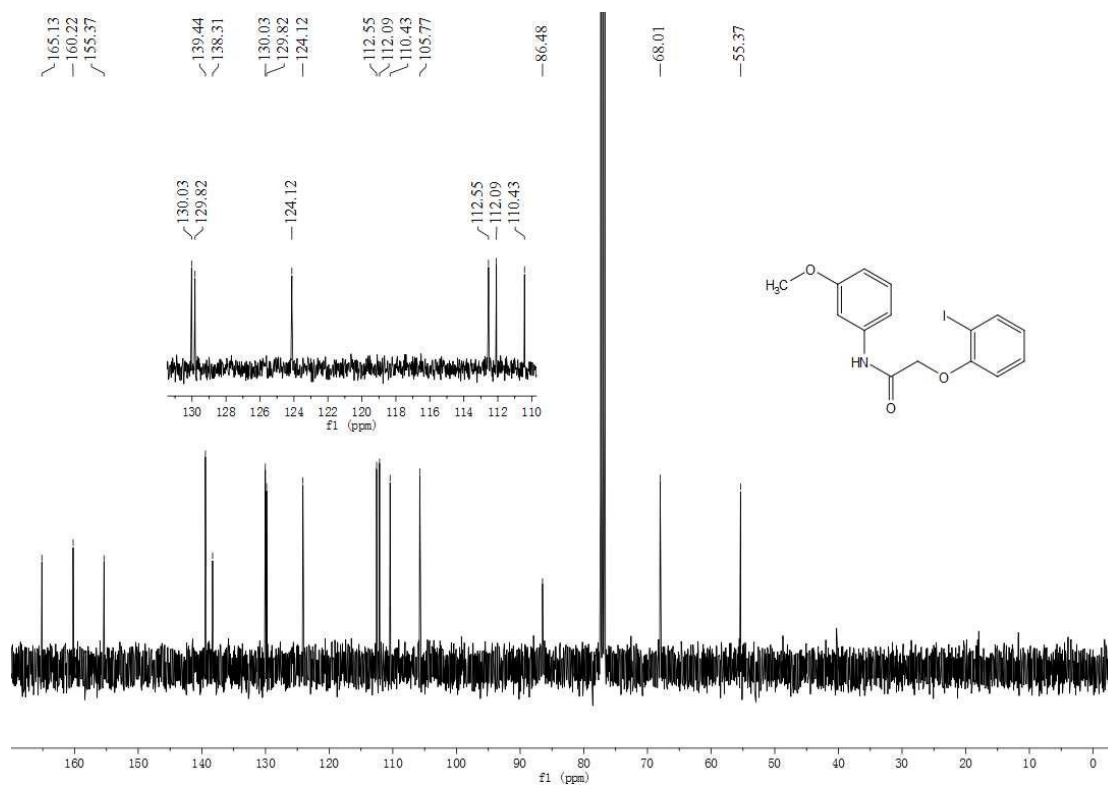

NMR spectra of **1x**

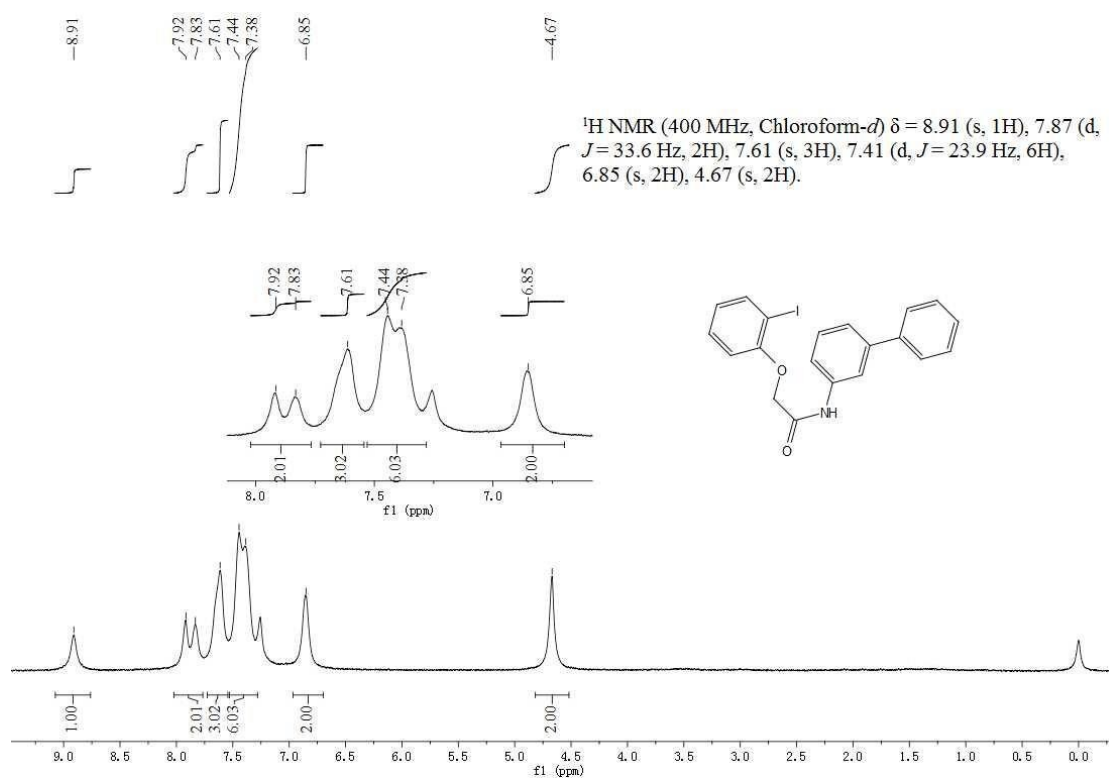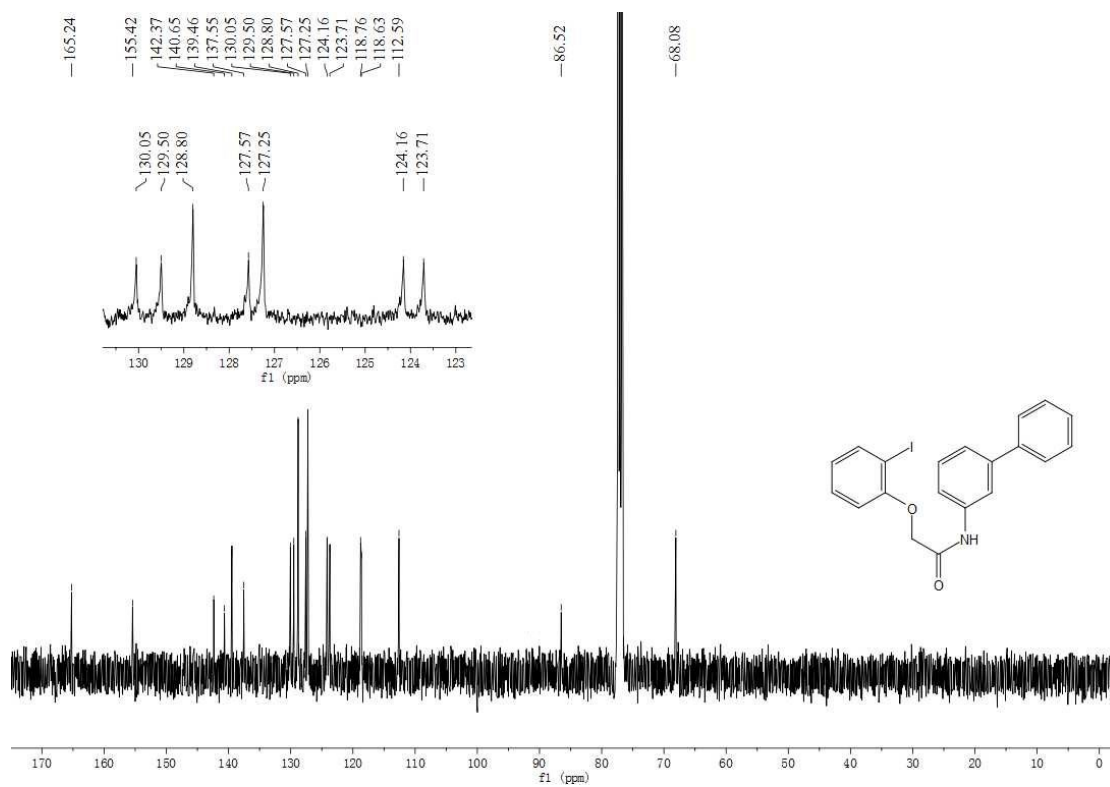

NMR spectra of **1y**

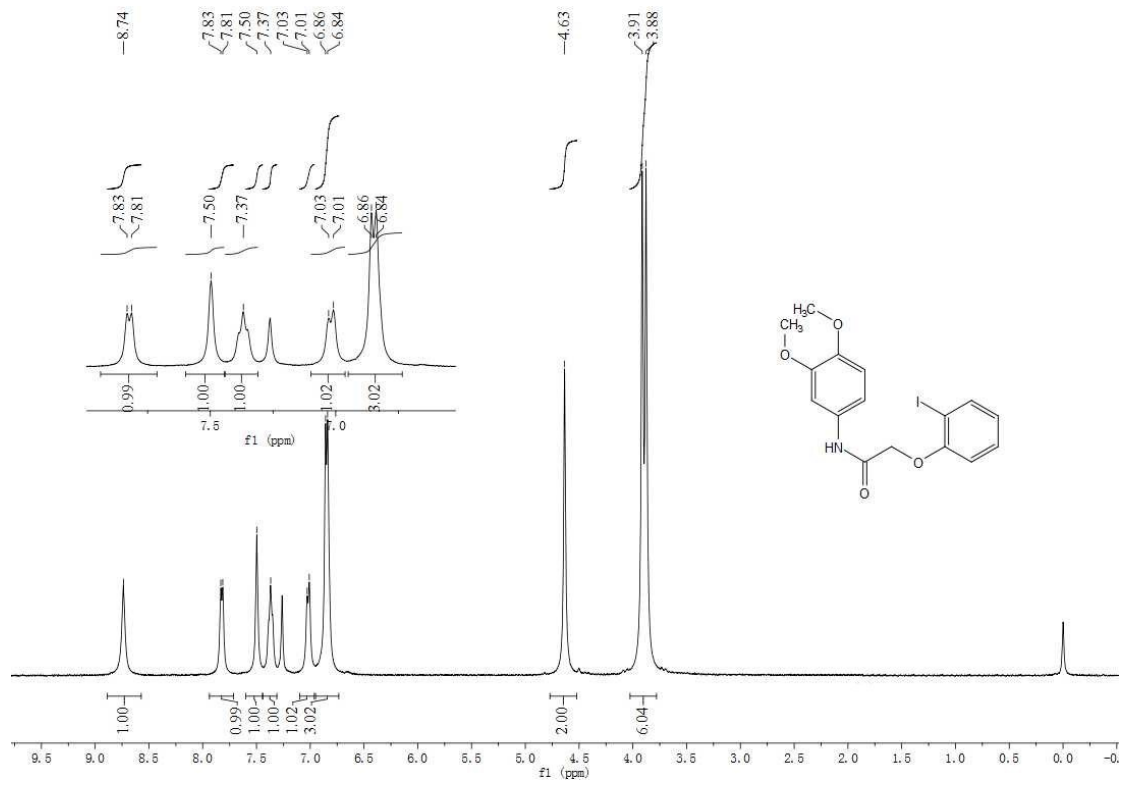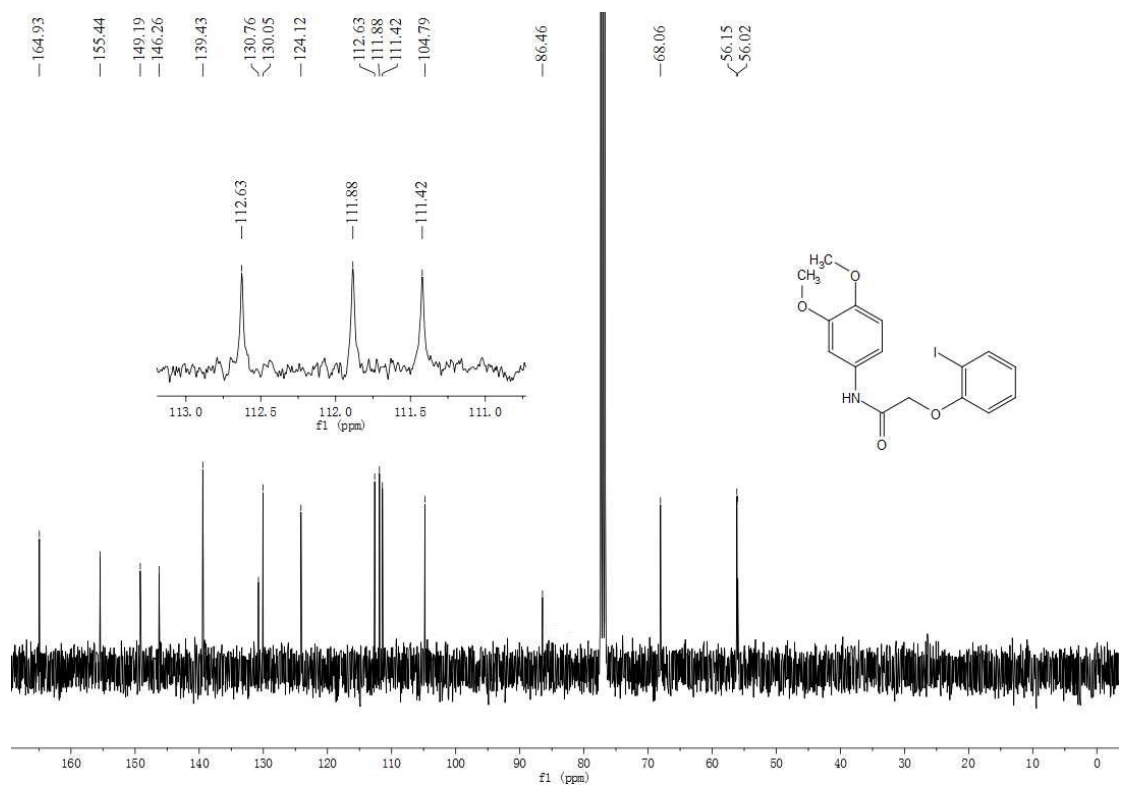

## 9.1H and 13C NMR spectra for 8-azaprotosappanin A and derivatives (2)

### NMR spectra of 2a

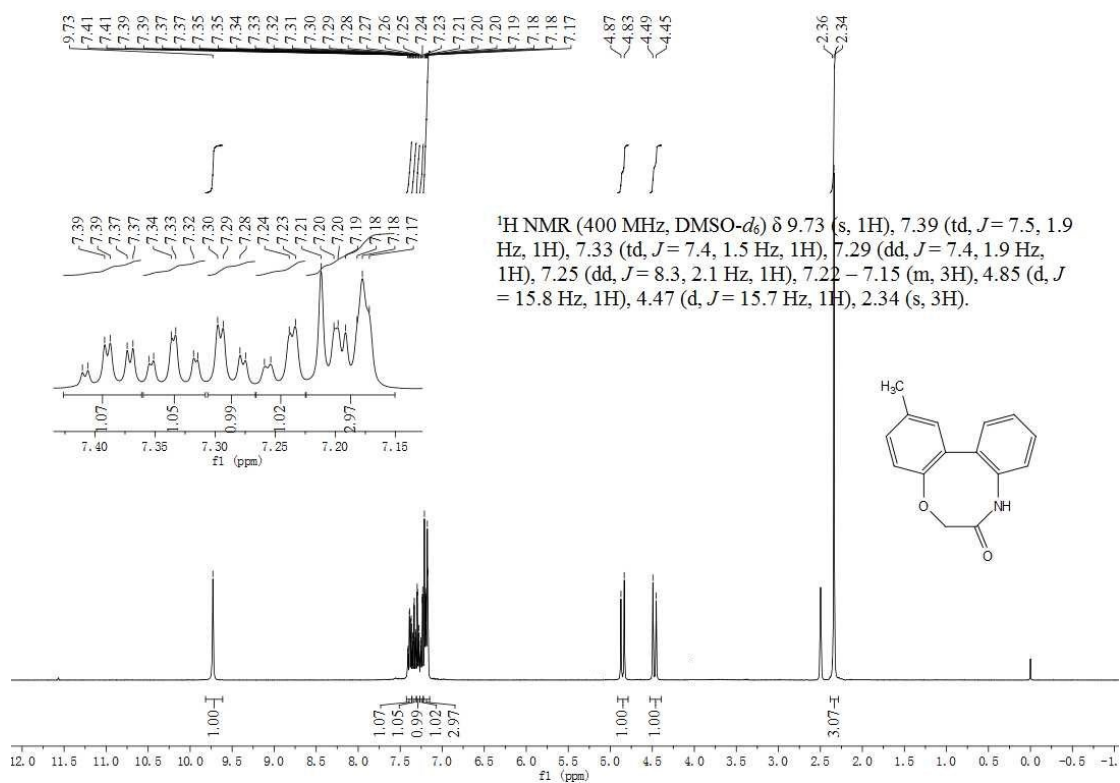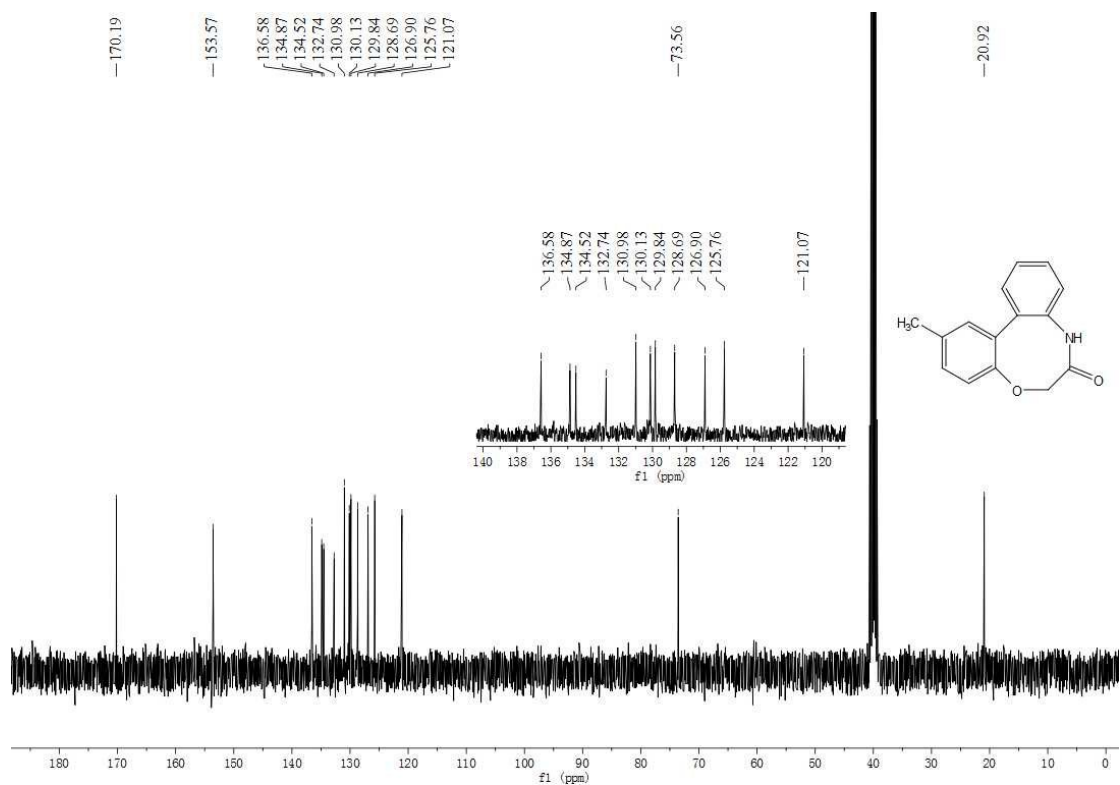

NMR spectra of **2b**

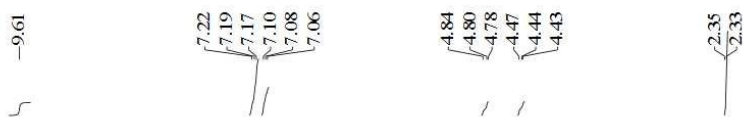

<sup>1</sup>H NMR (400 MHz, DMSO-*d*<sub>6</sub>) δ 9.61 (s, 0H), 7.24 – 7.15 (m, 2H), 7.12 – 7.04 (m, 1H), 4.82 (d, *J* = 15.7 Hz, 1H), 4.48 – 4.41 (m, 1H), 2.33 (s, 3H).

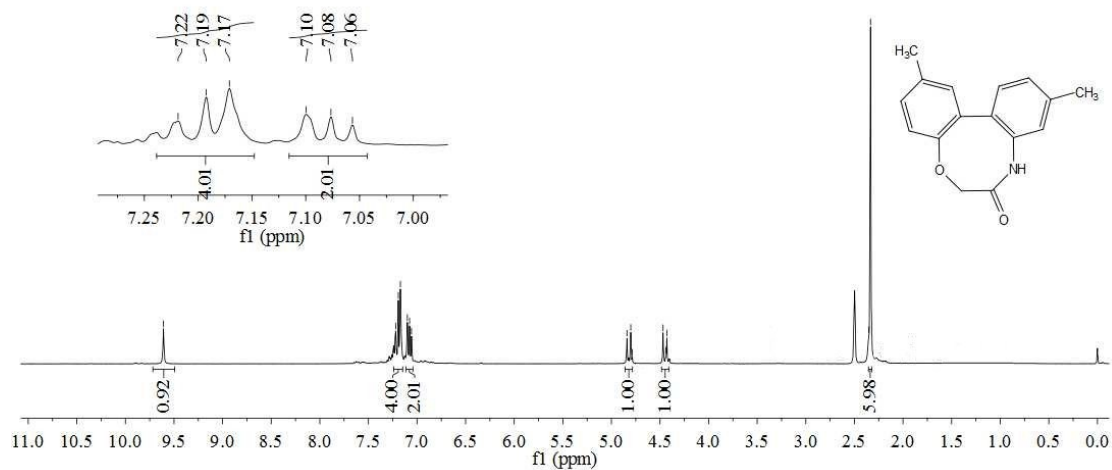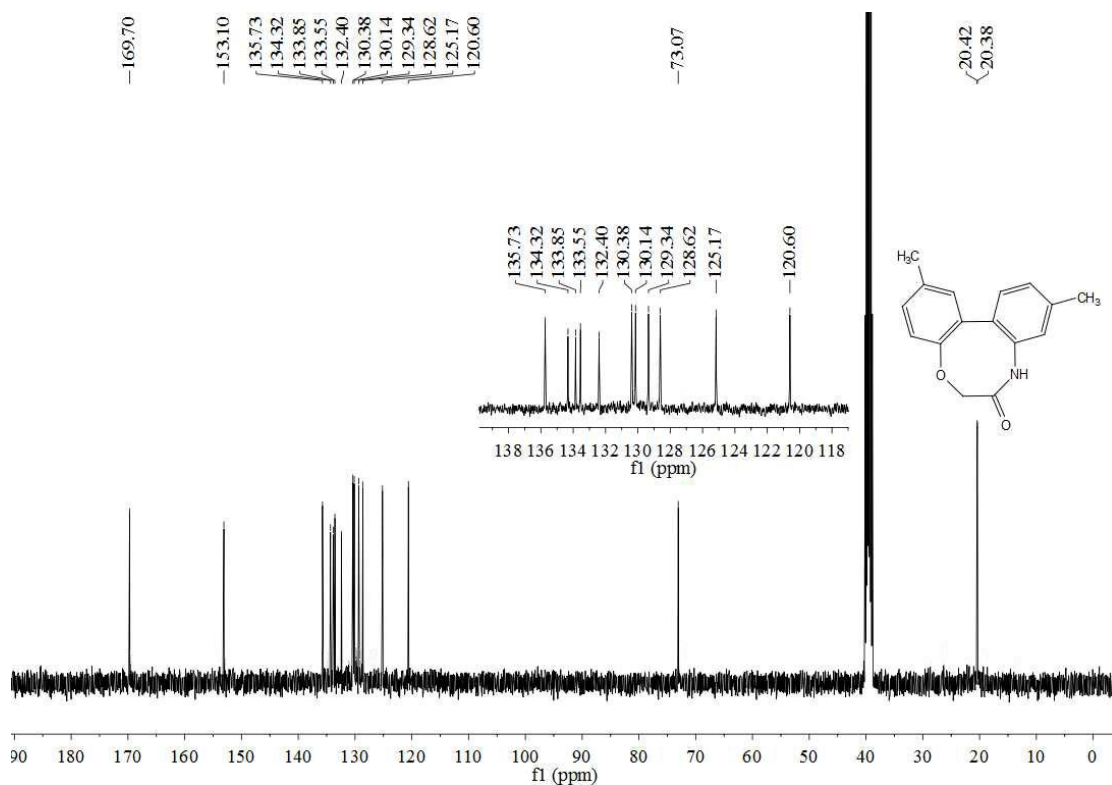

NMR spectra of **2c**

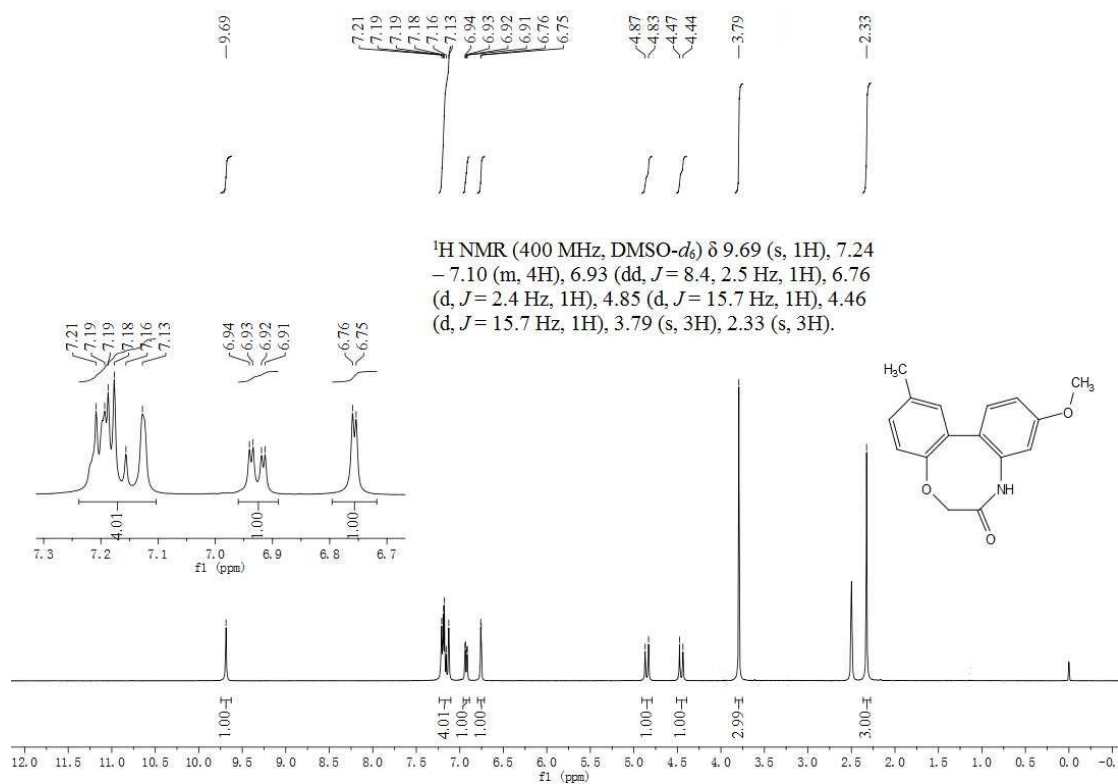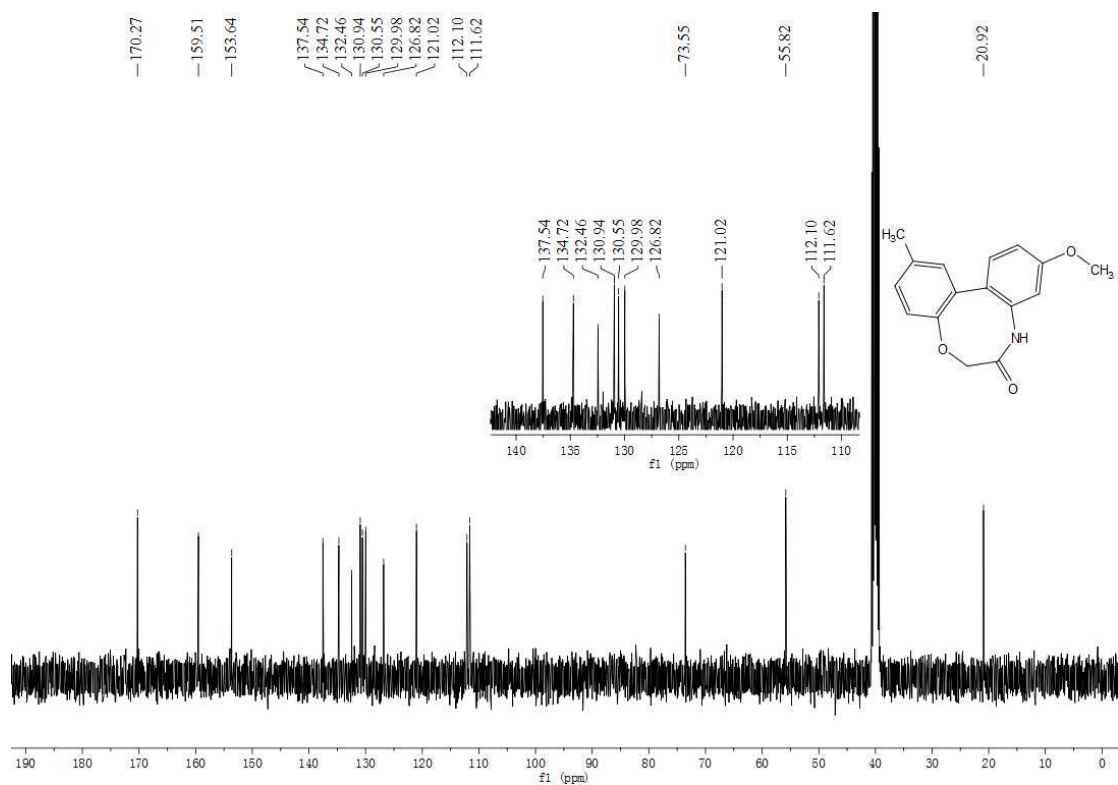

NMR spectra of **2d**

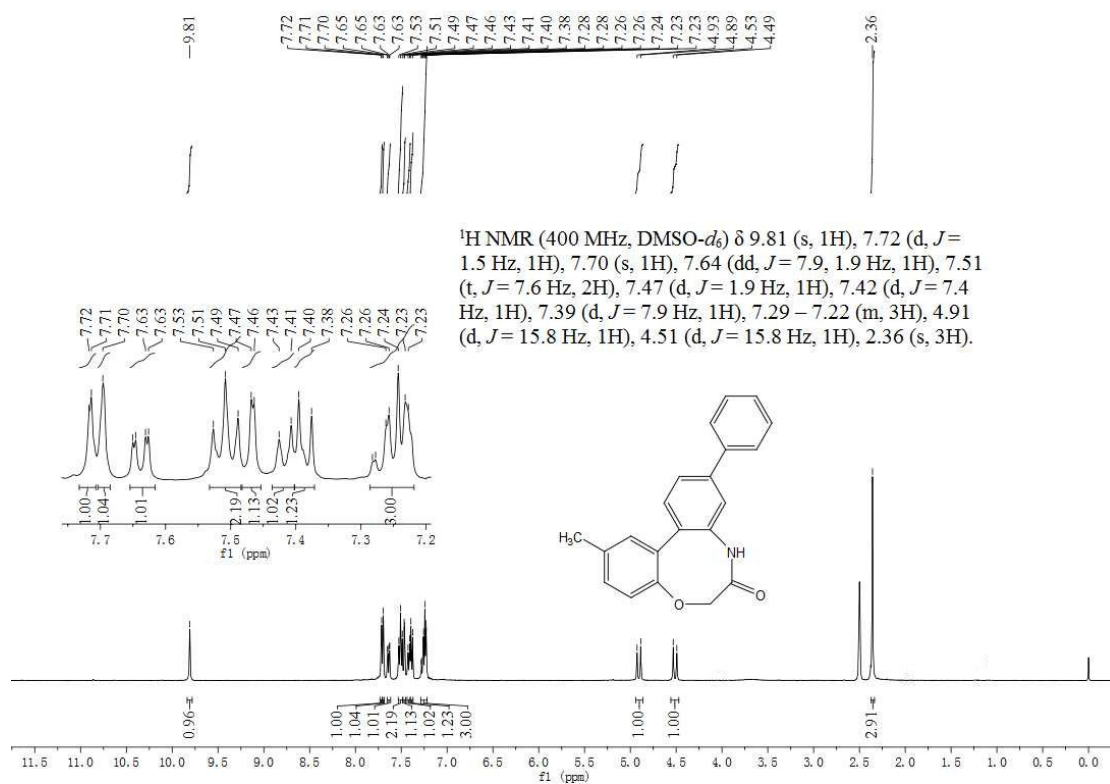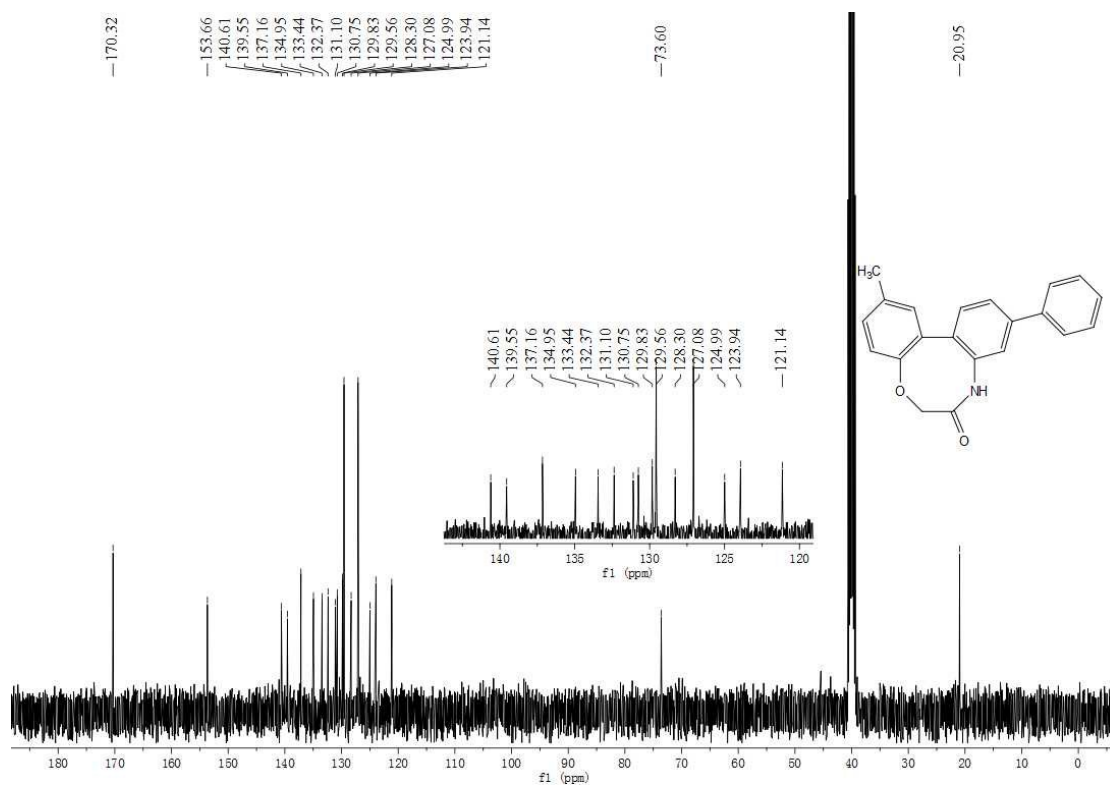



NMR spectra of **2e**

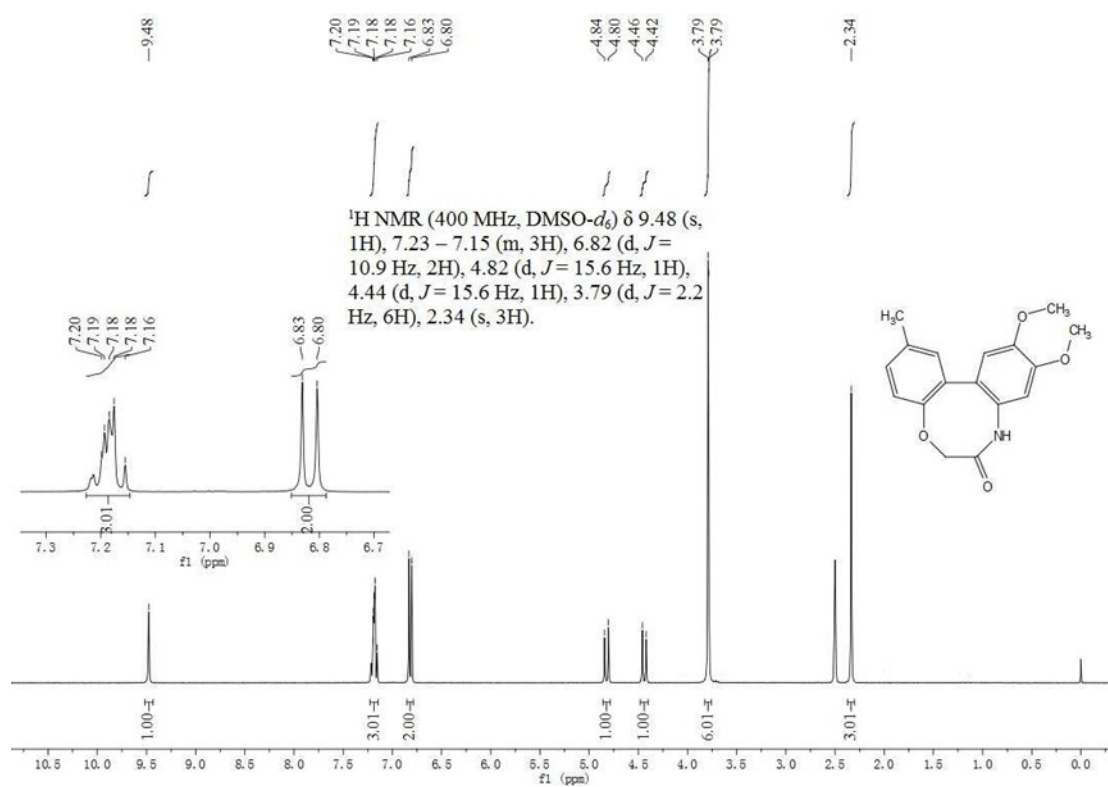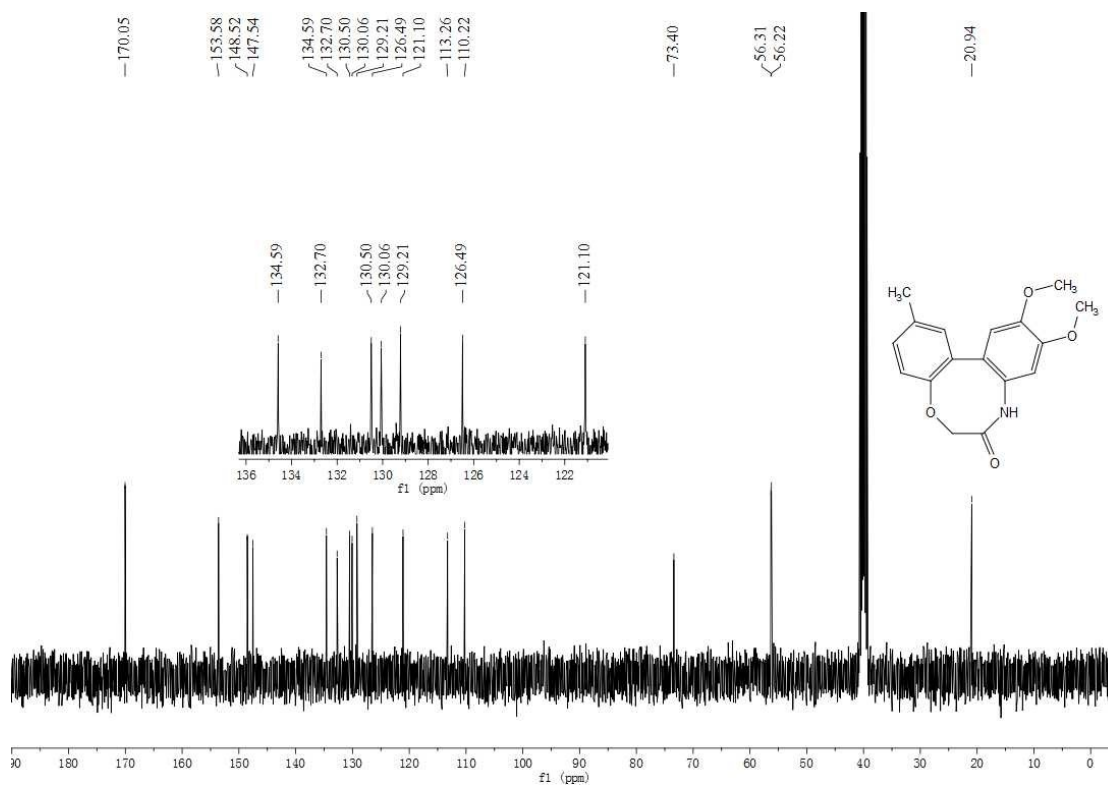

NMR spectra of **2f**

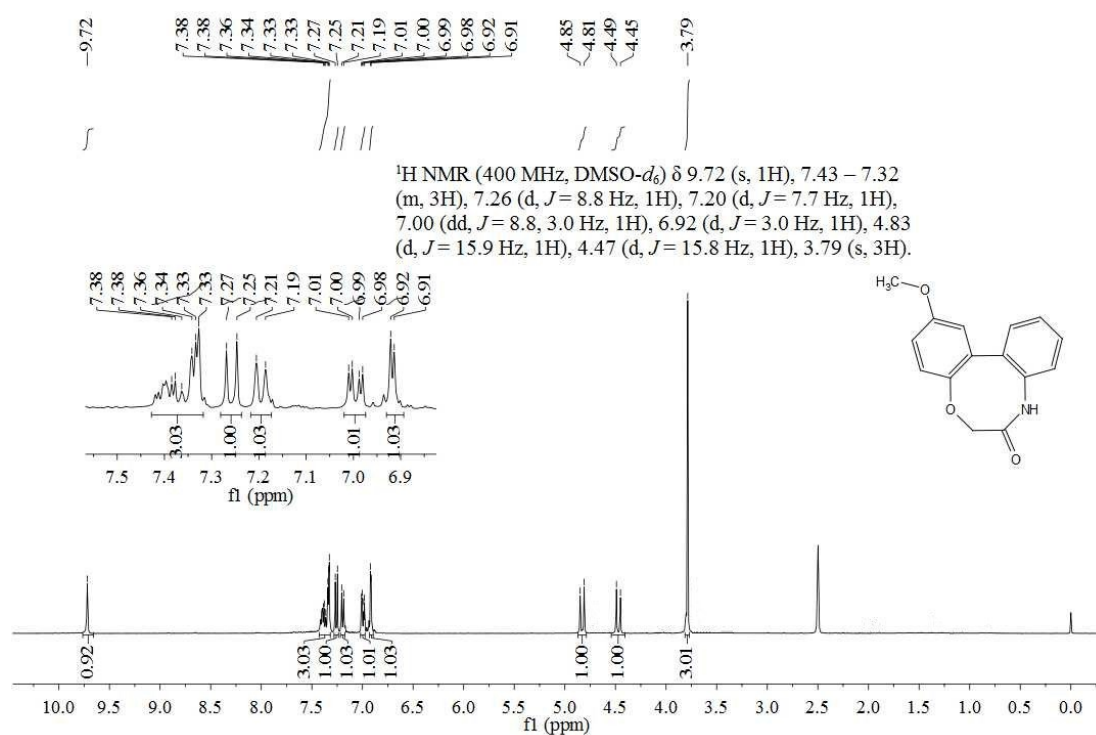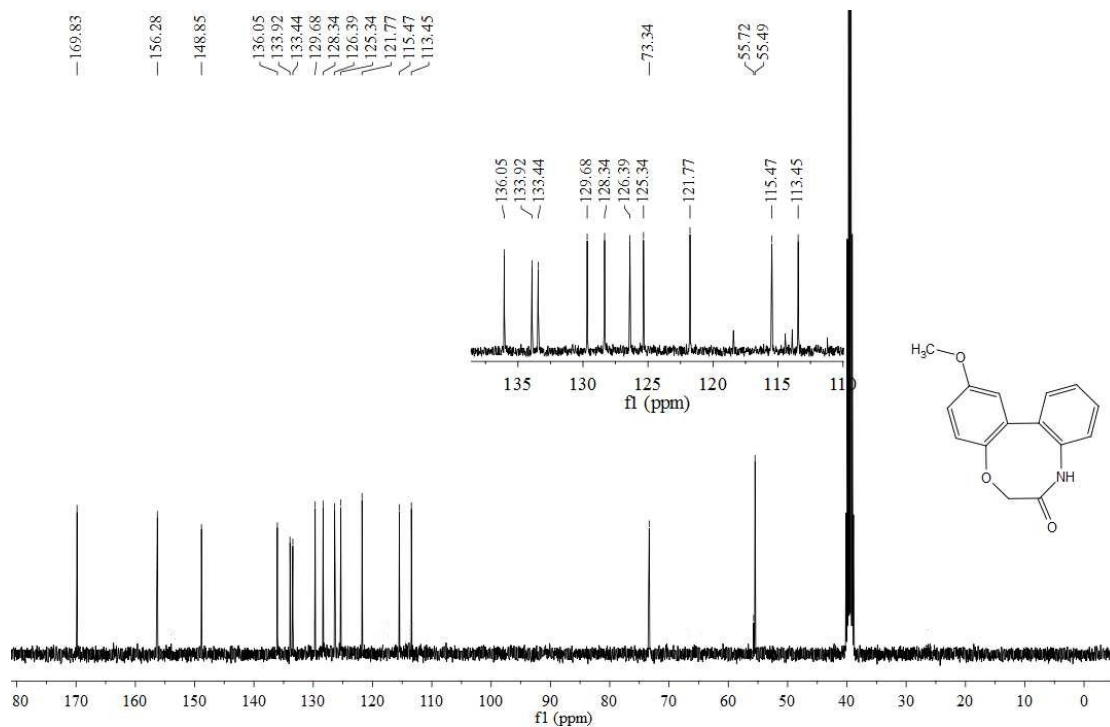

NMR spectra of **2g**

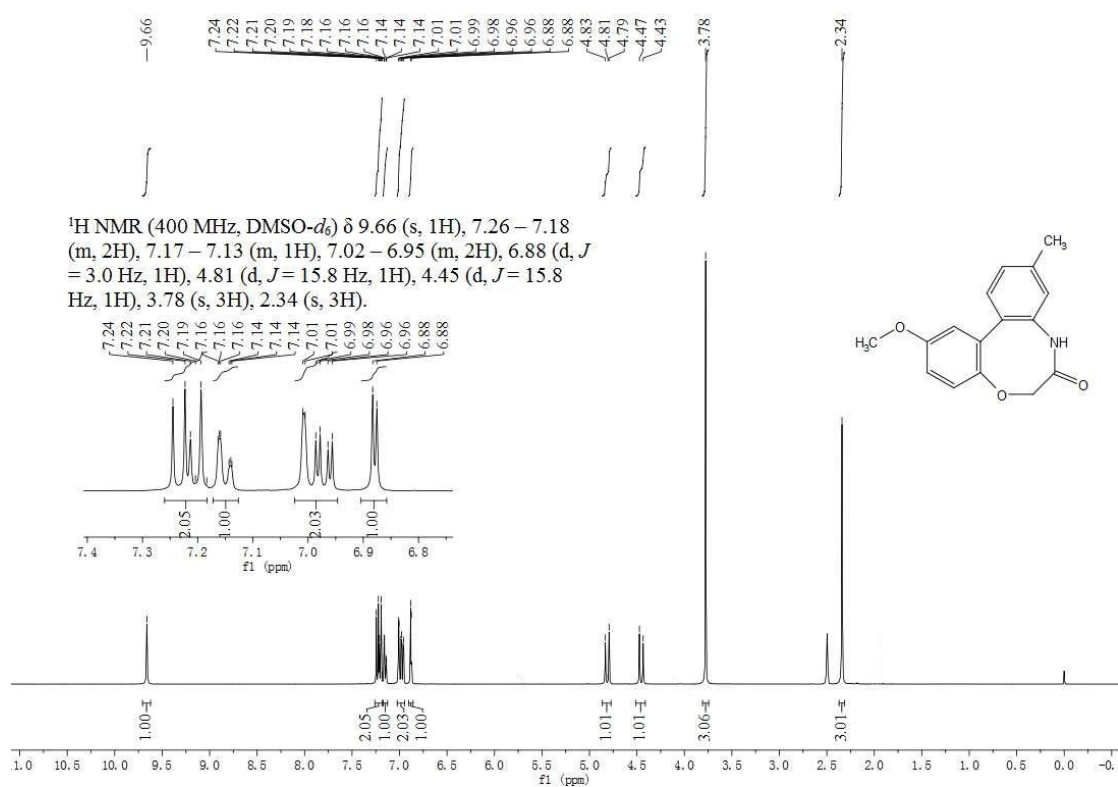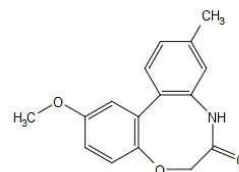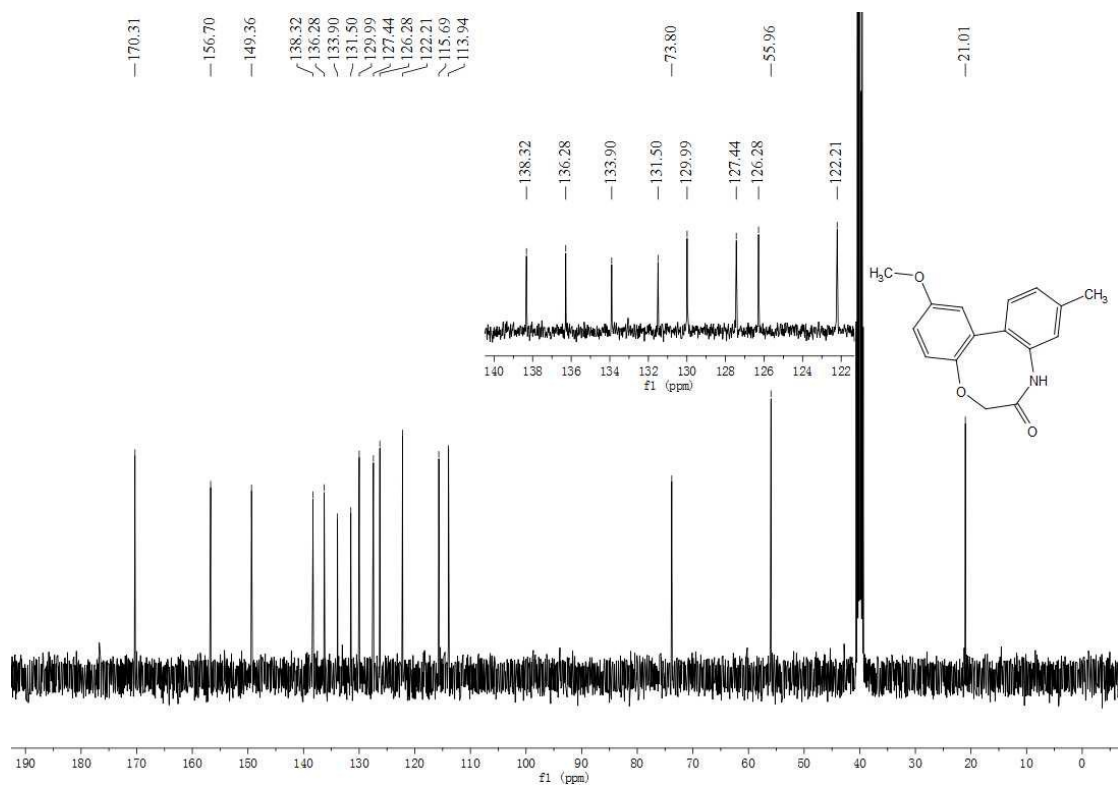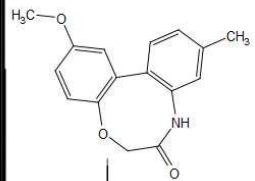

NMR spectra of **2h**

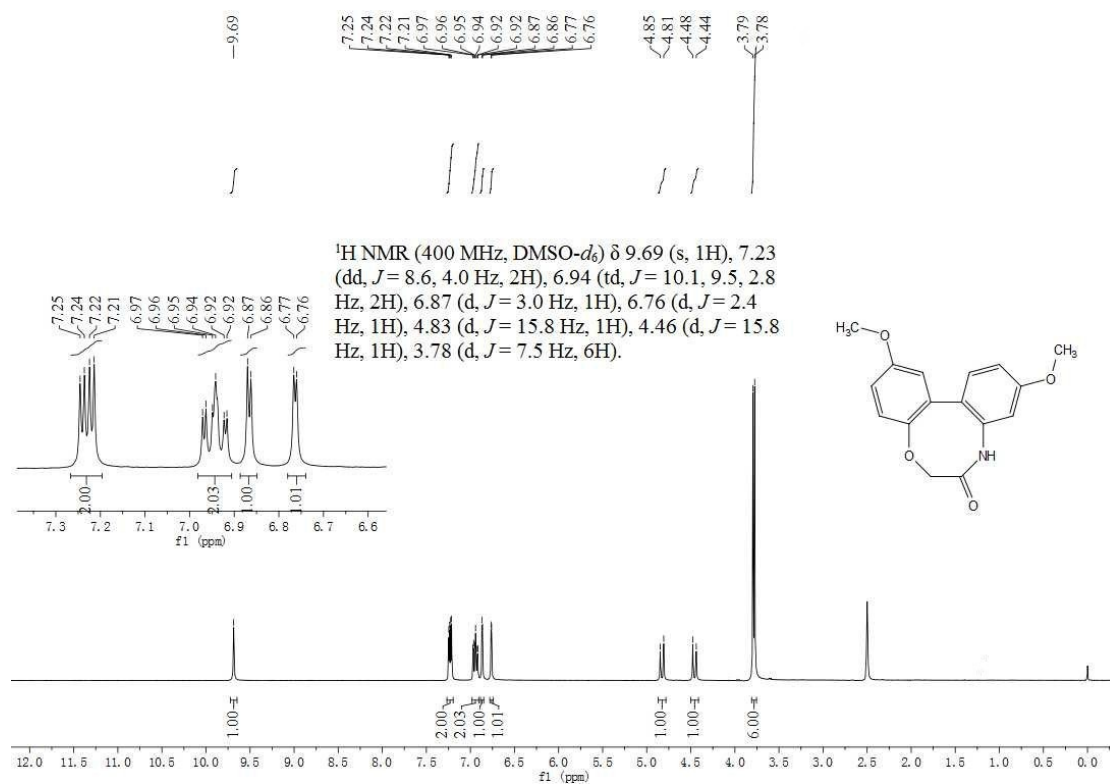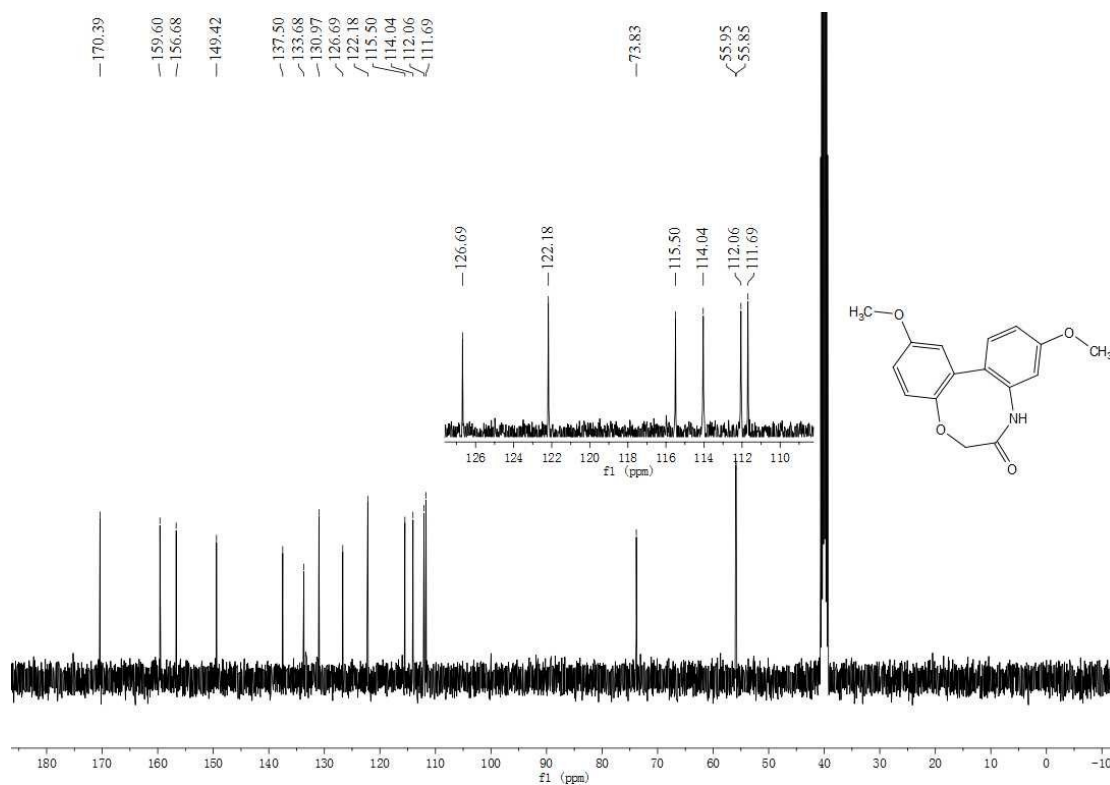

NMR spectra of **2i**

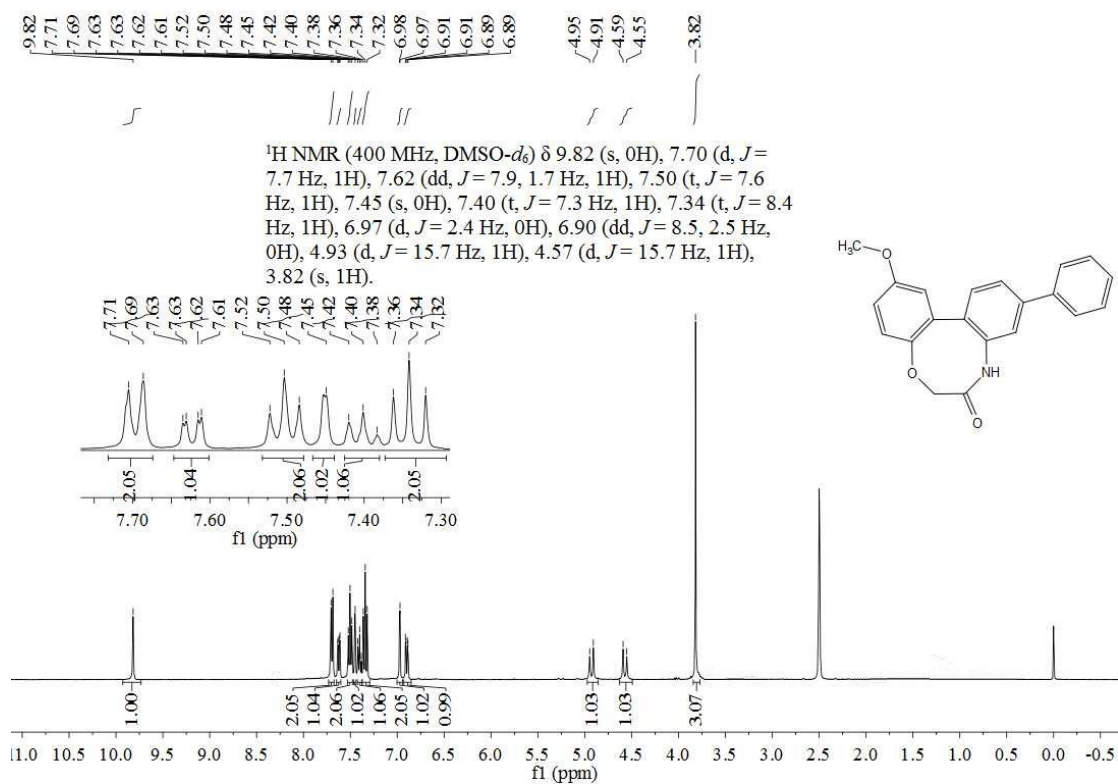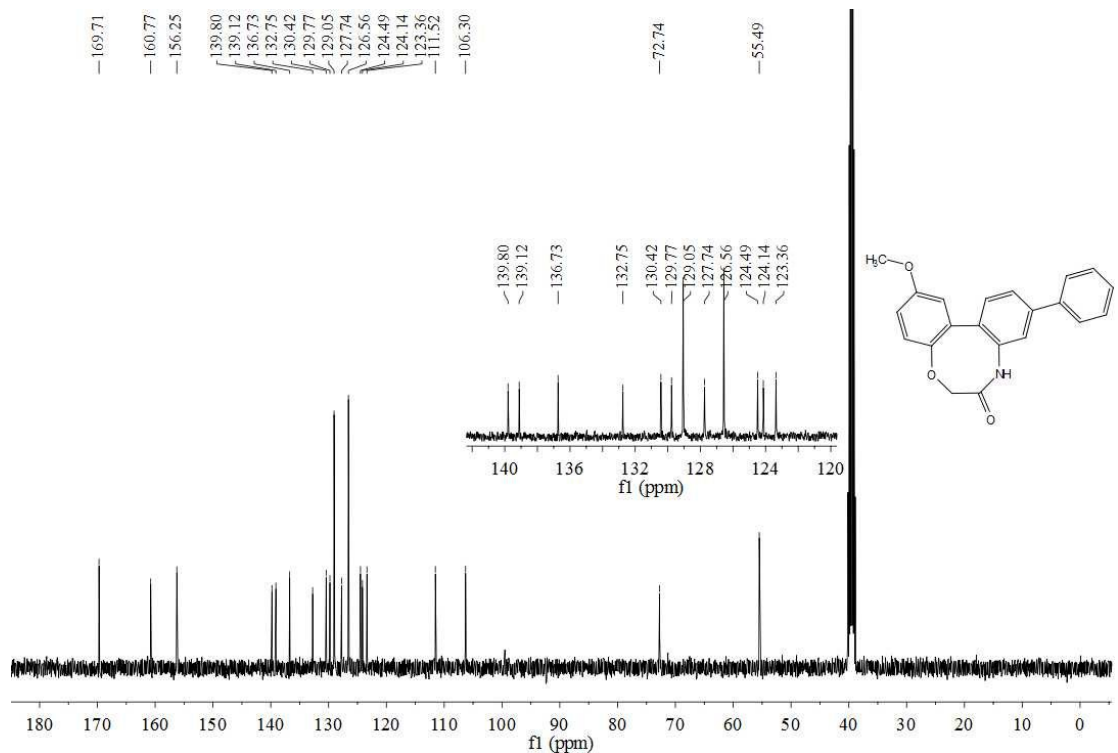

NMR spectra of **2j**

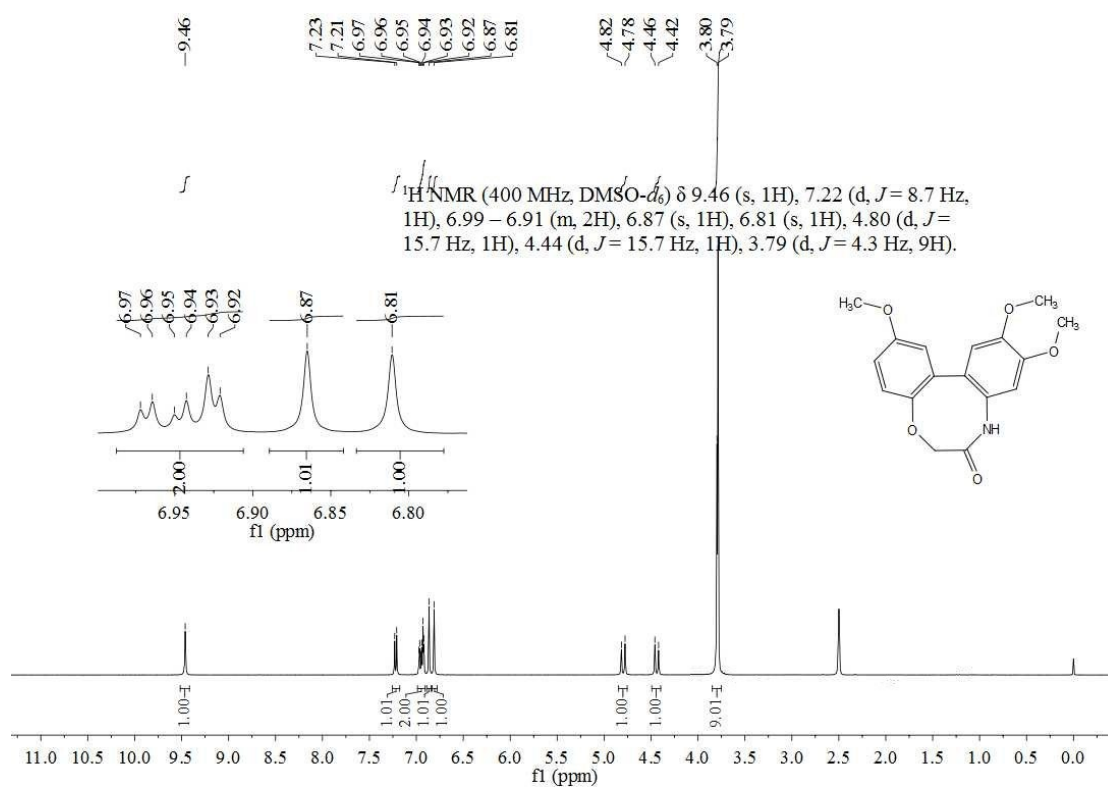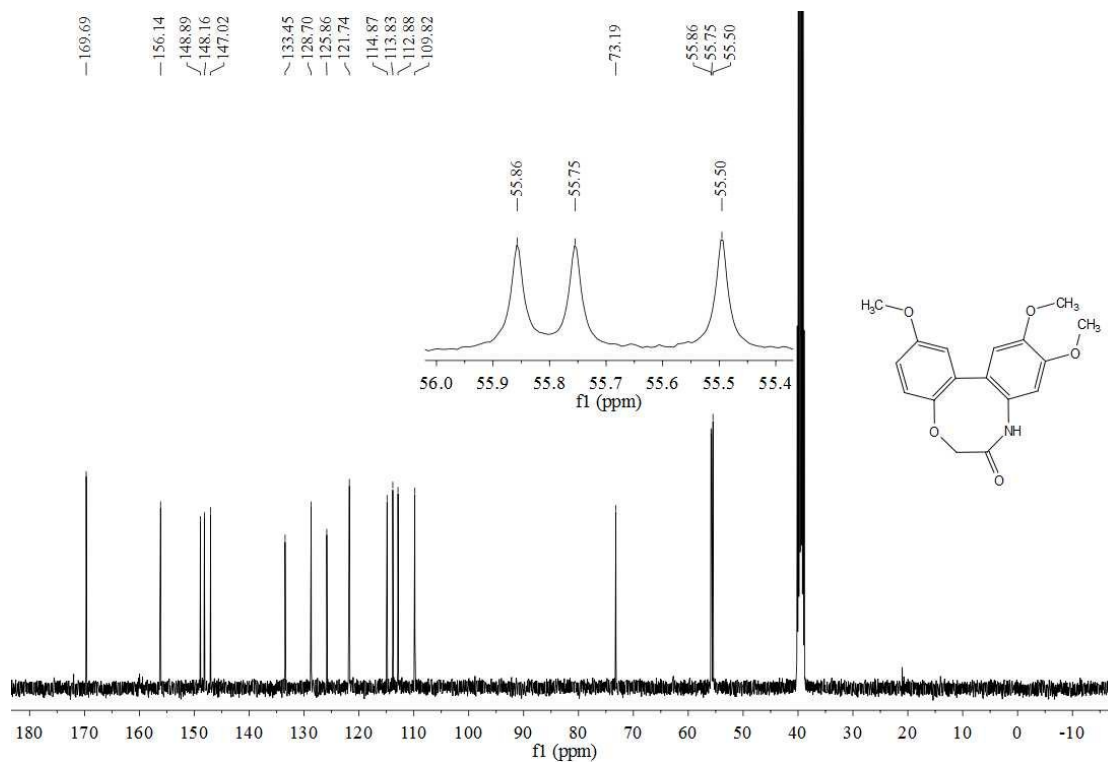

NMR spectra of **2k**

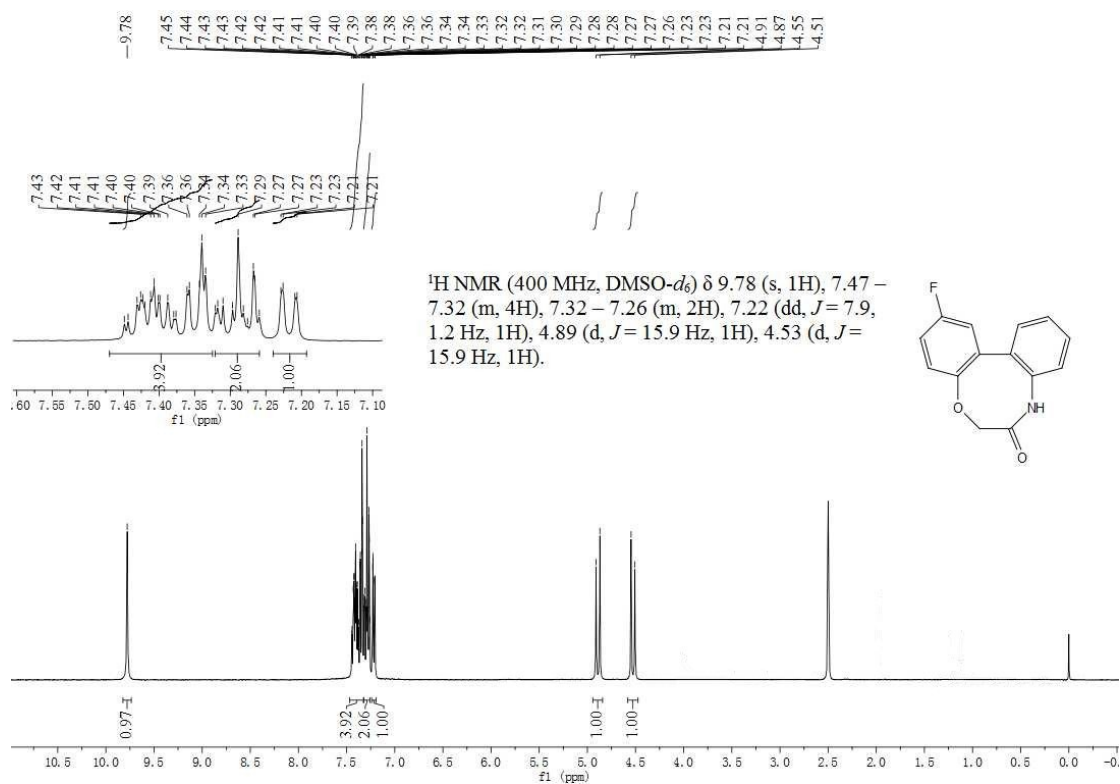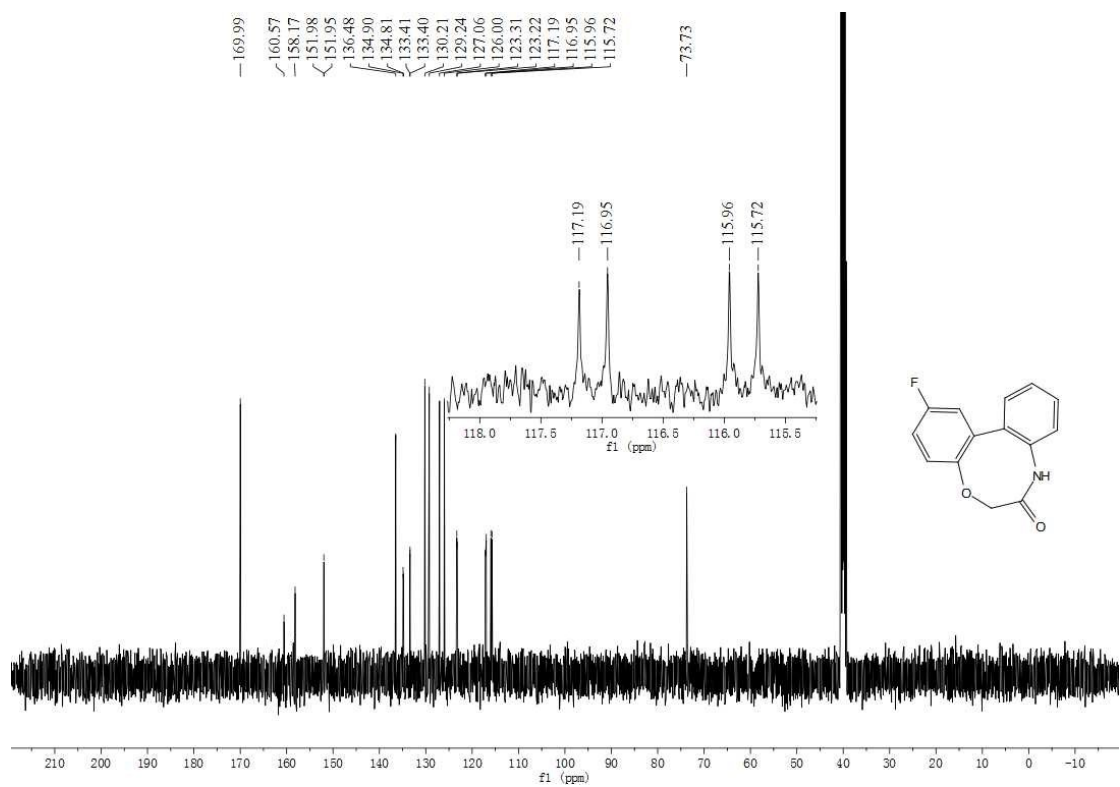

NMR spectra of **21**

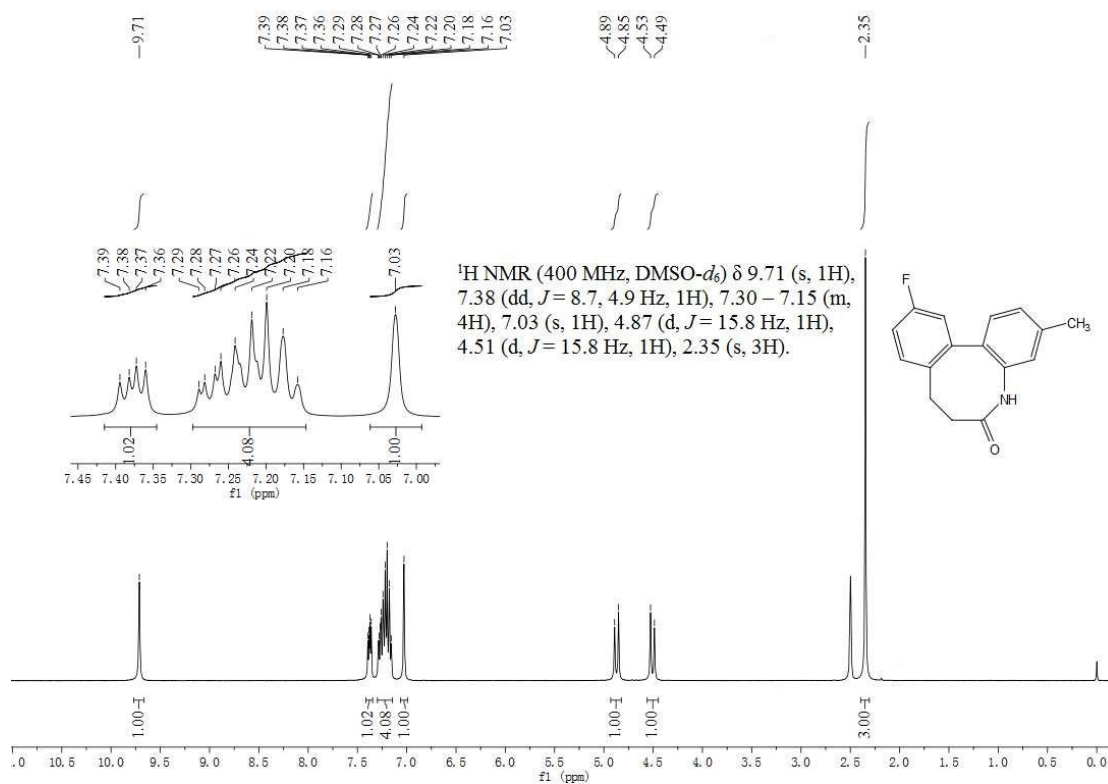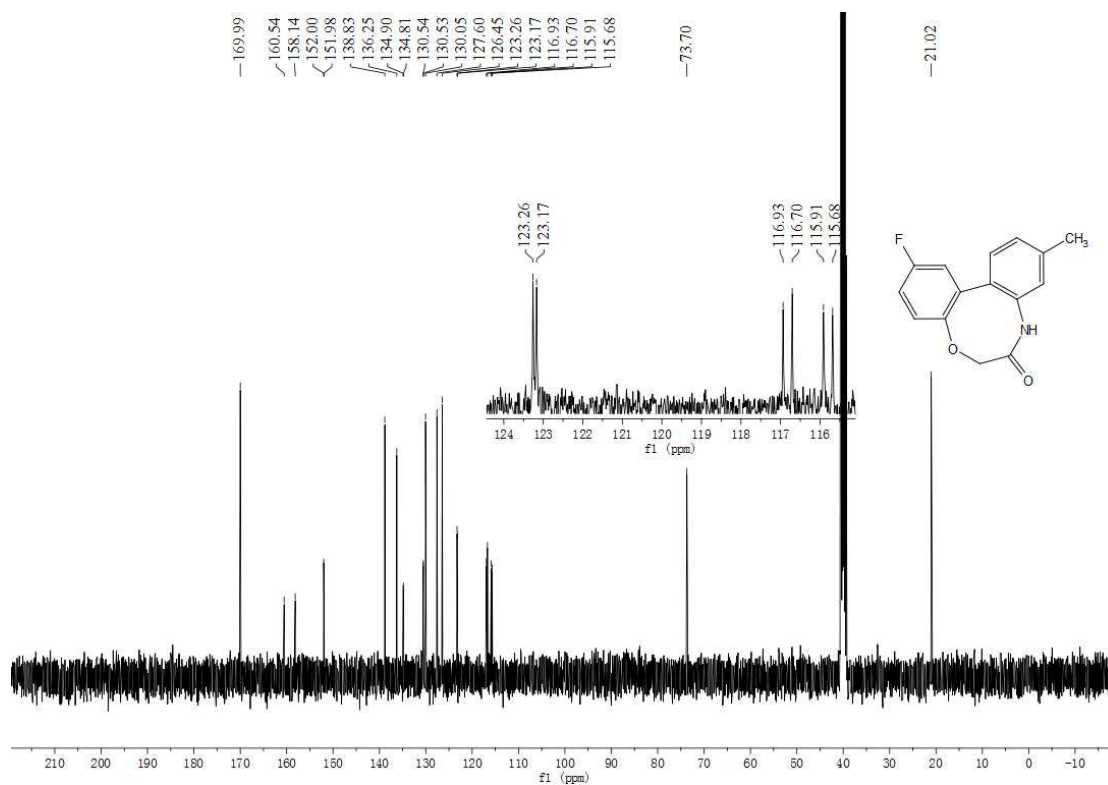



NMR spectra of **2m**

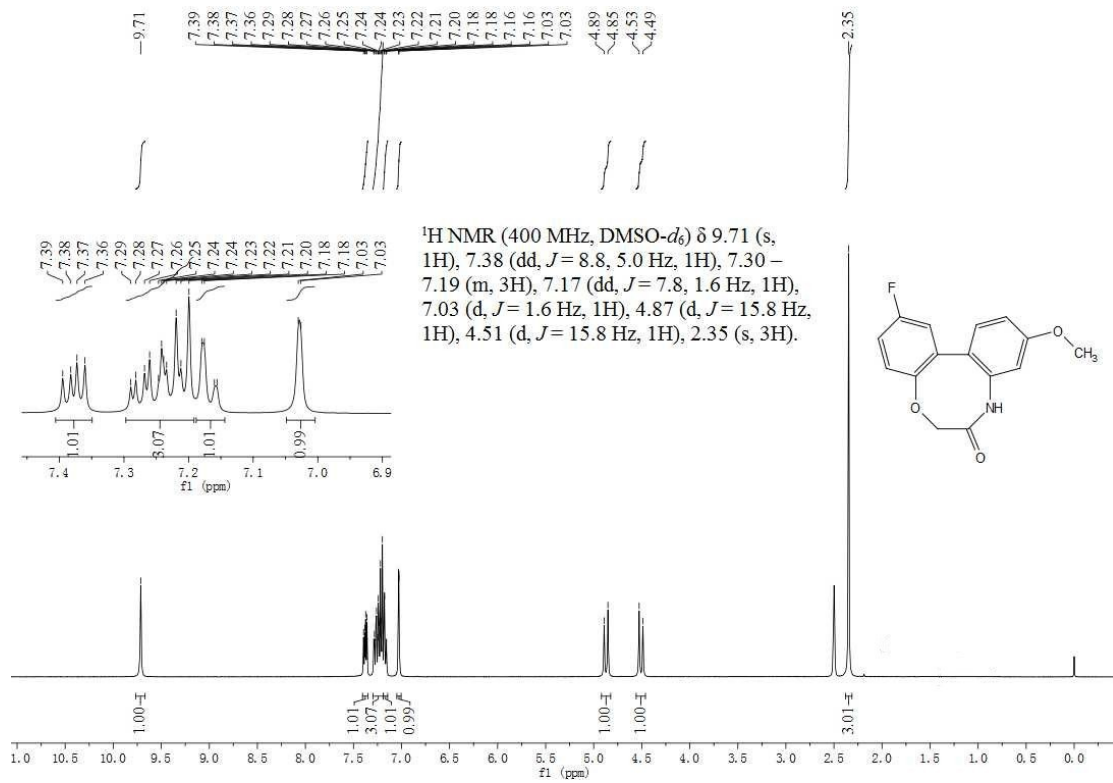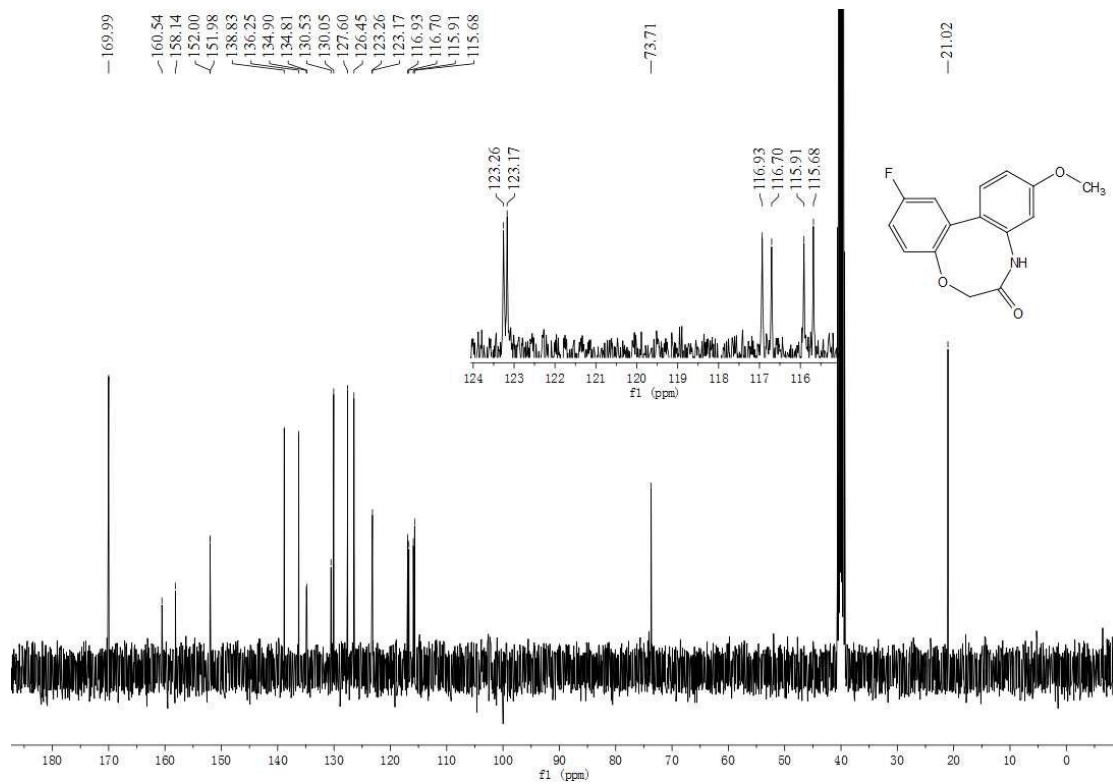

NMR spectra of **2n**

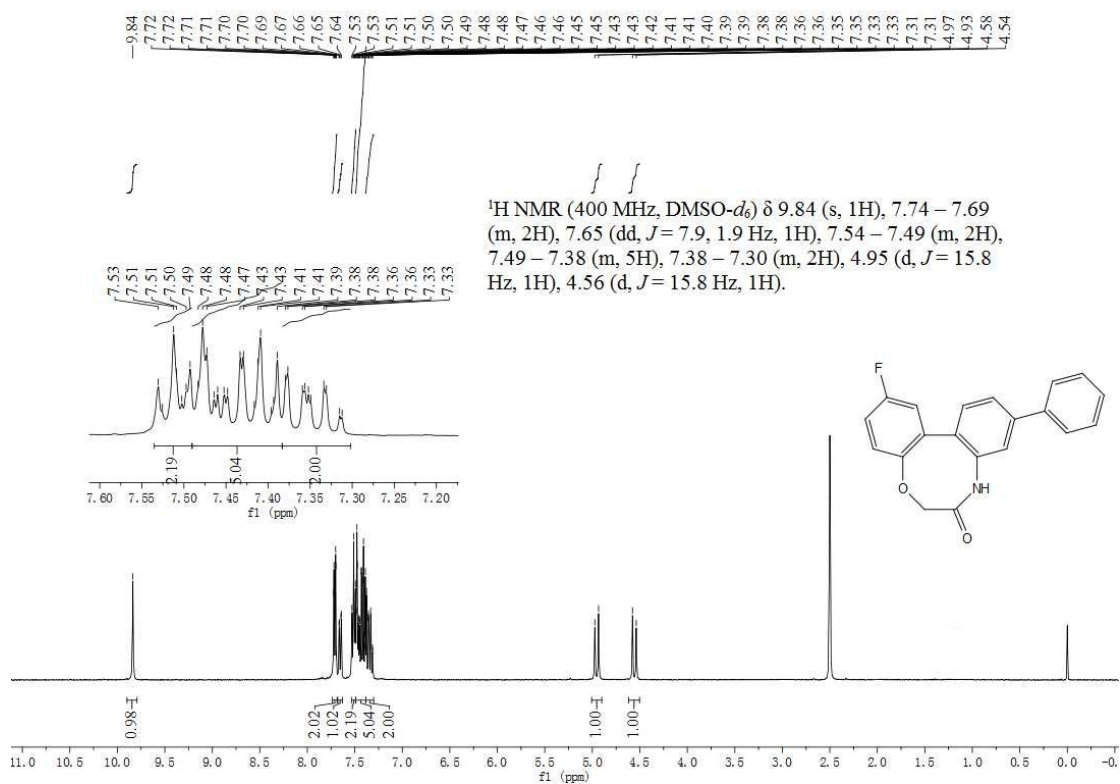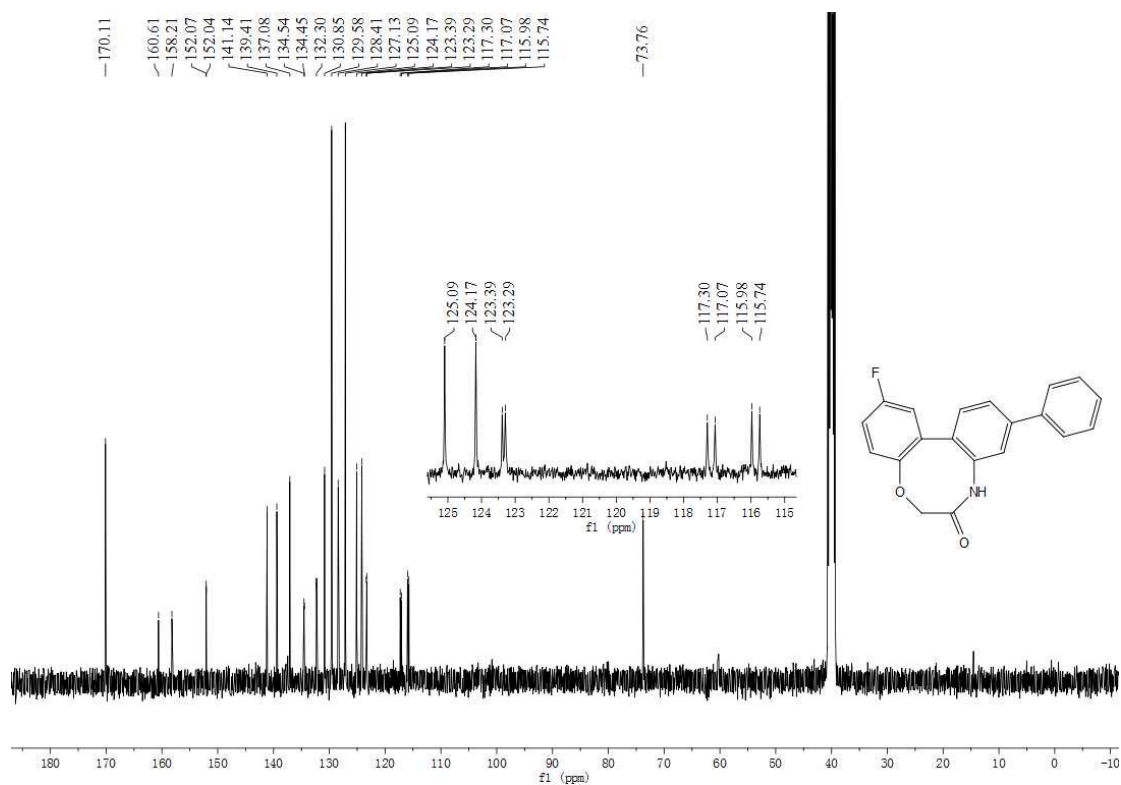

NMR spectra of **2o**

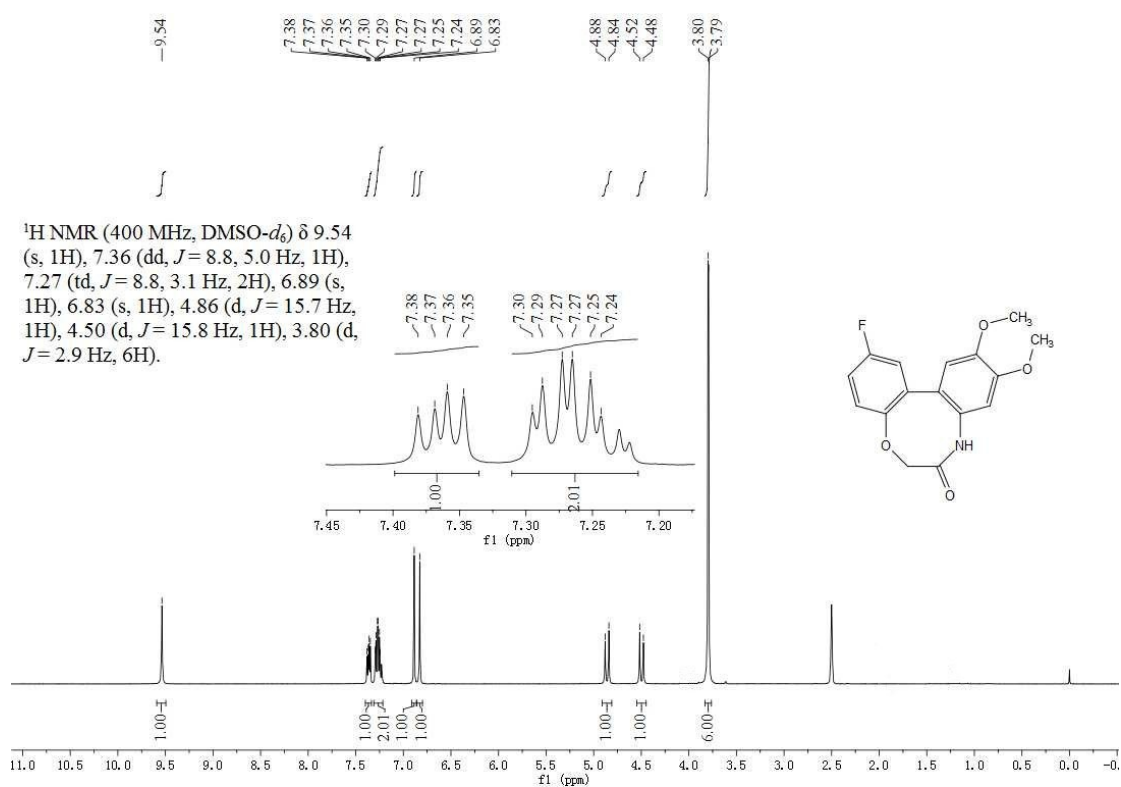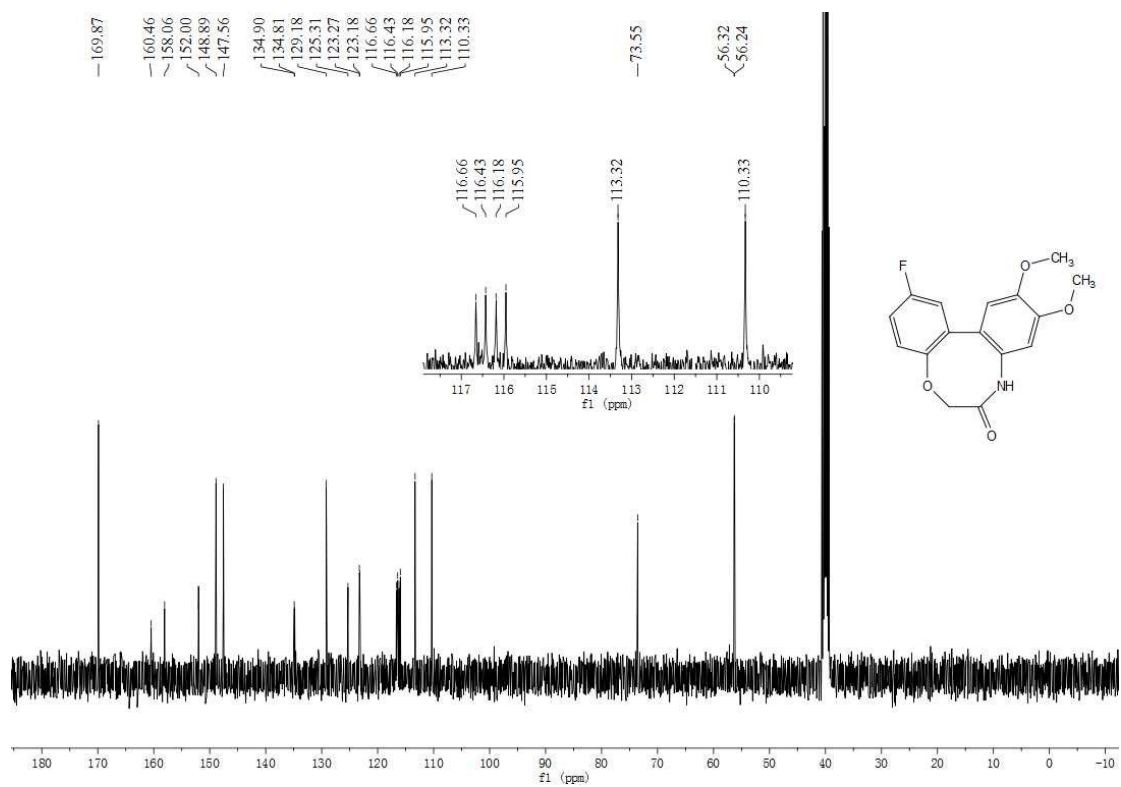

NMR spectra of **2p**

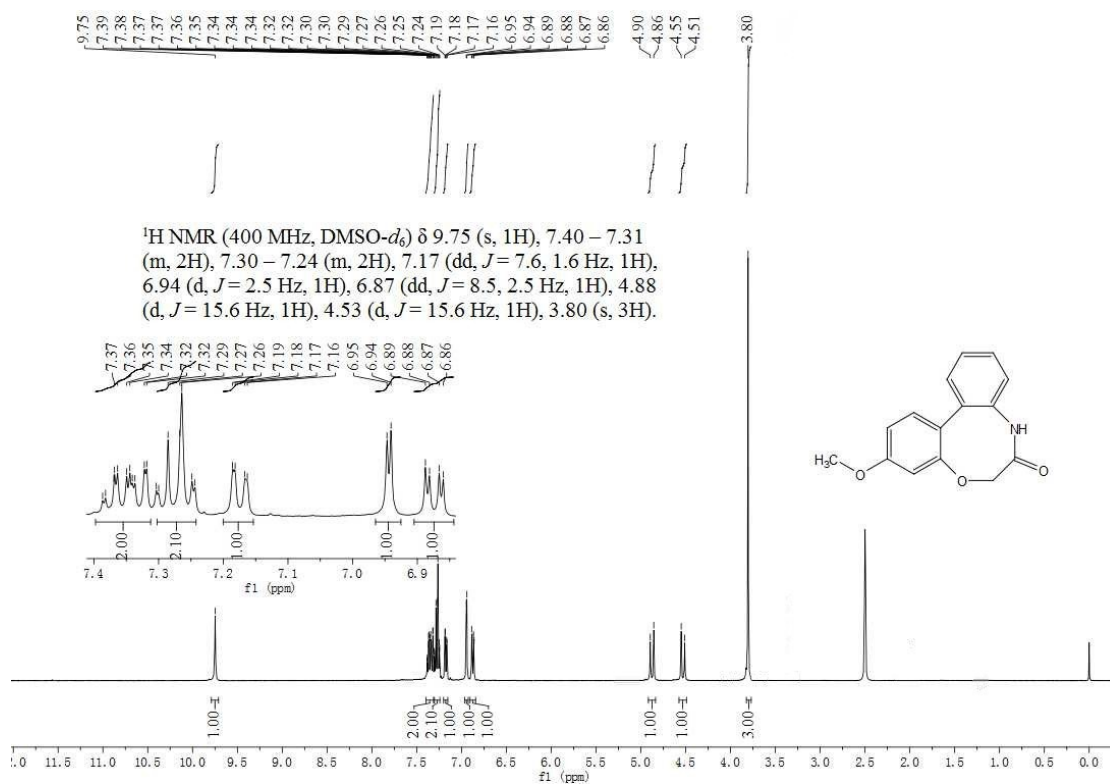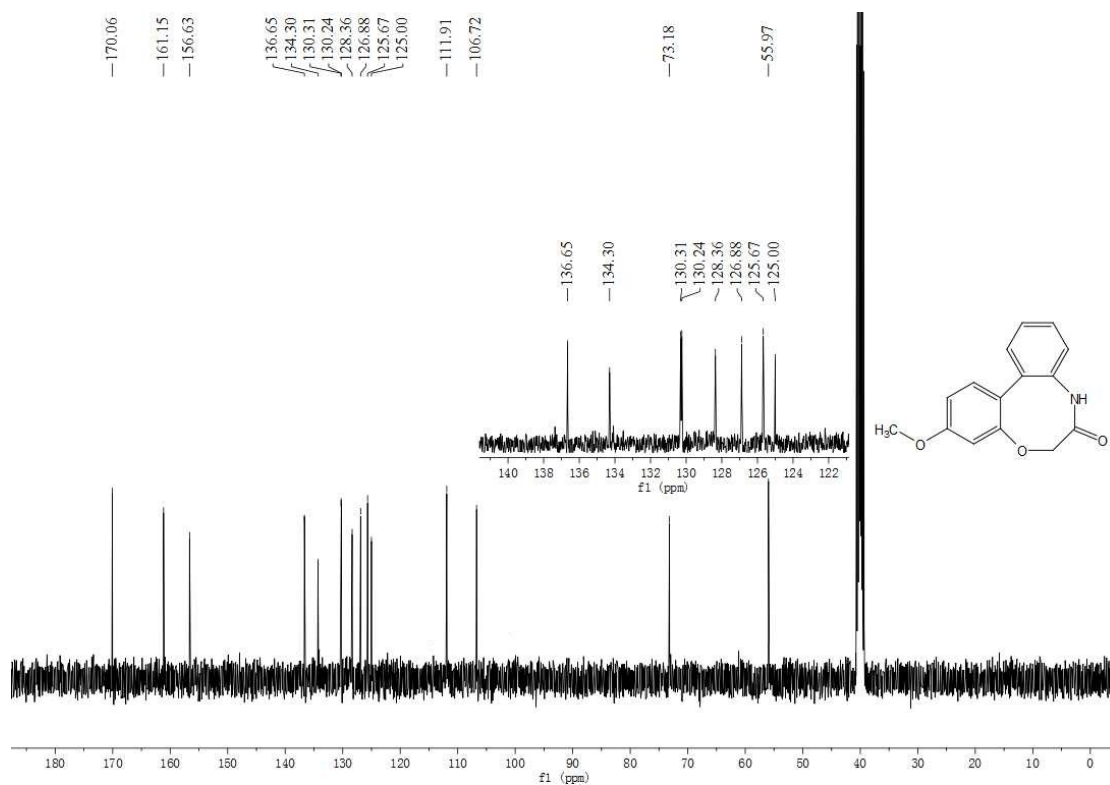

NMR spectra of **2q**

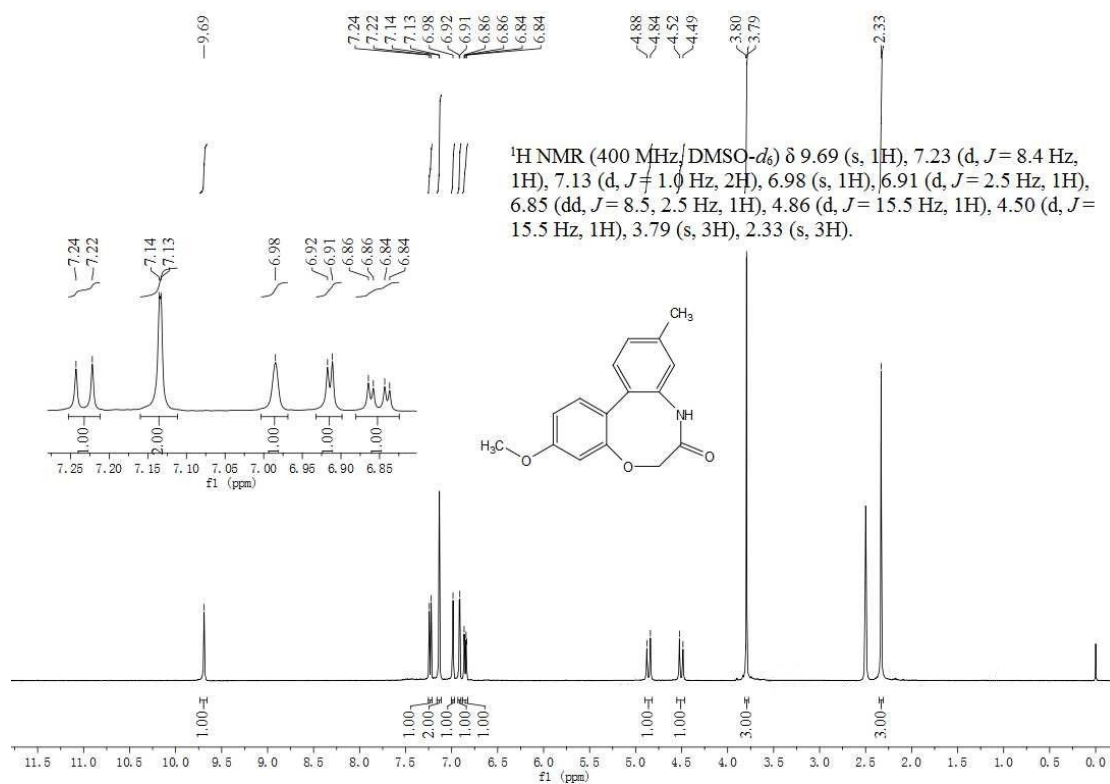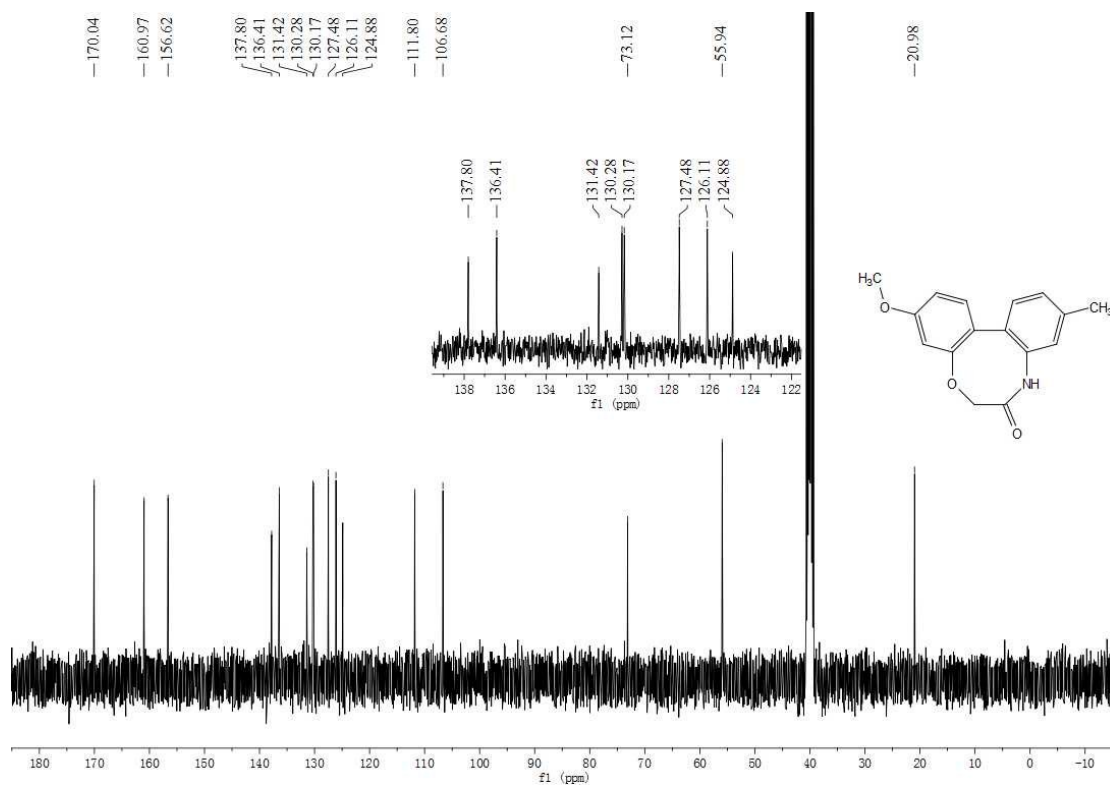

NMR spectra of **2r**

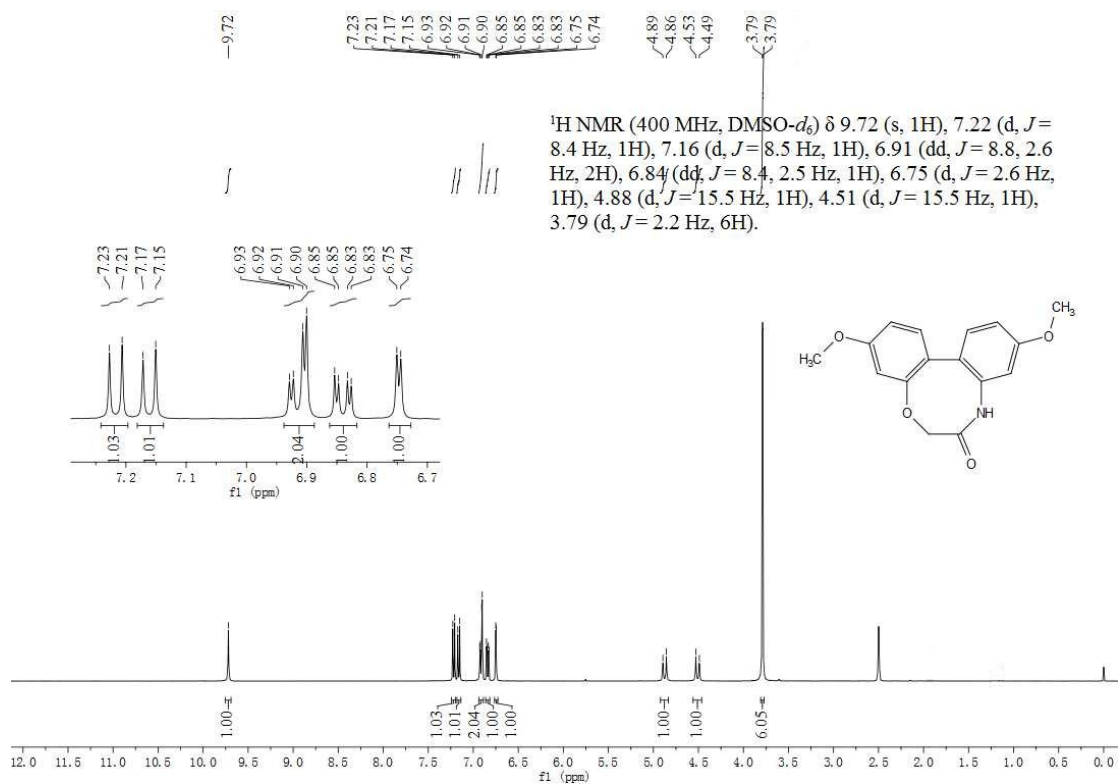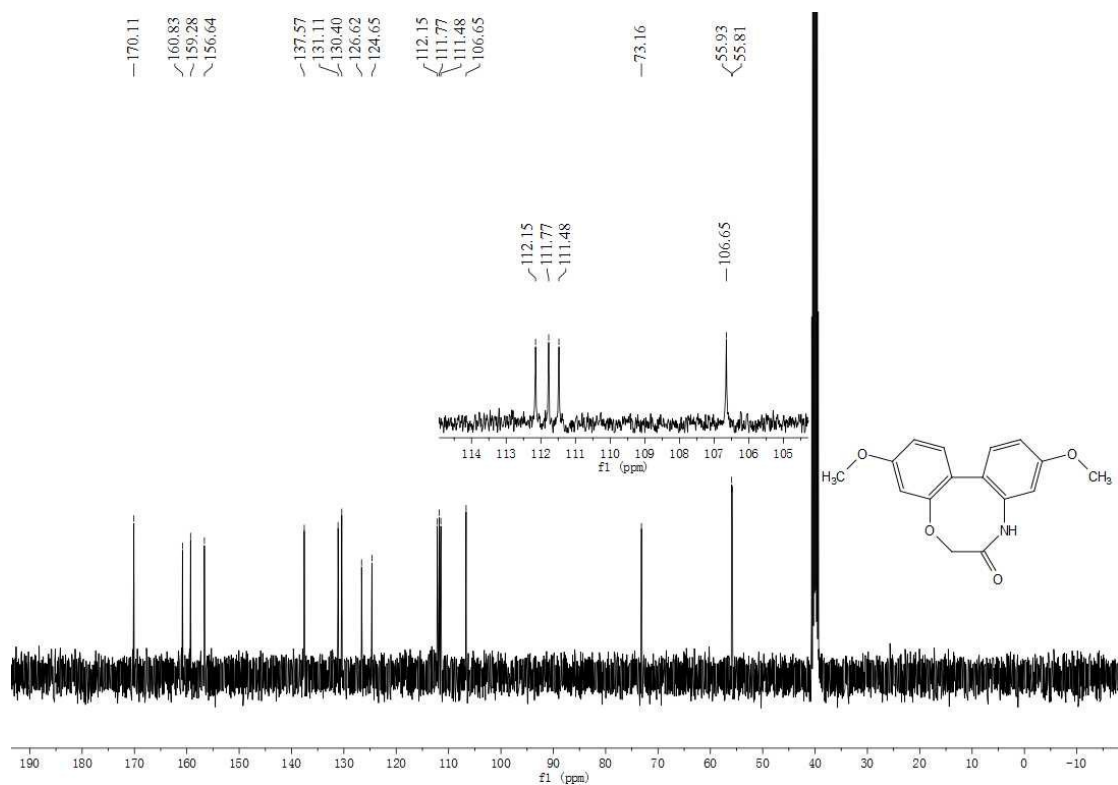

NMR spectra of **2s**

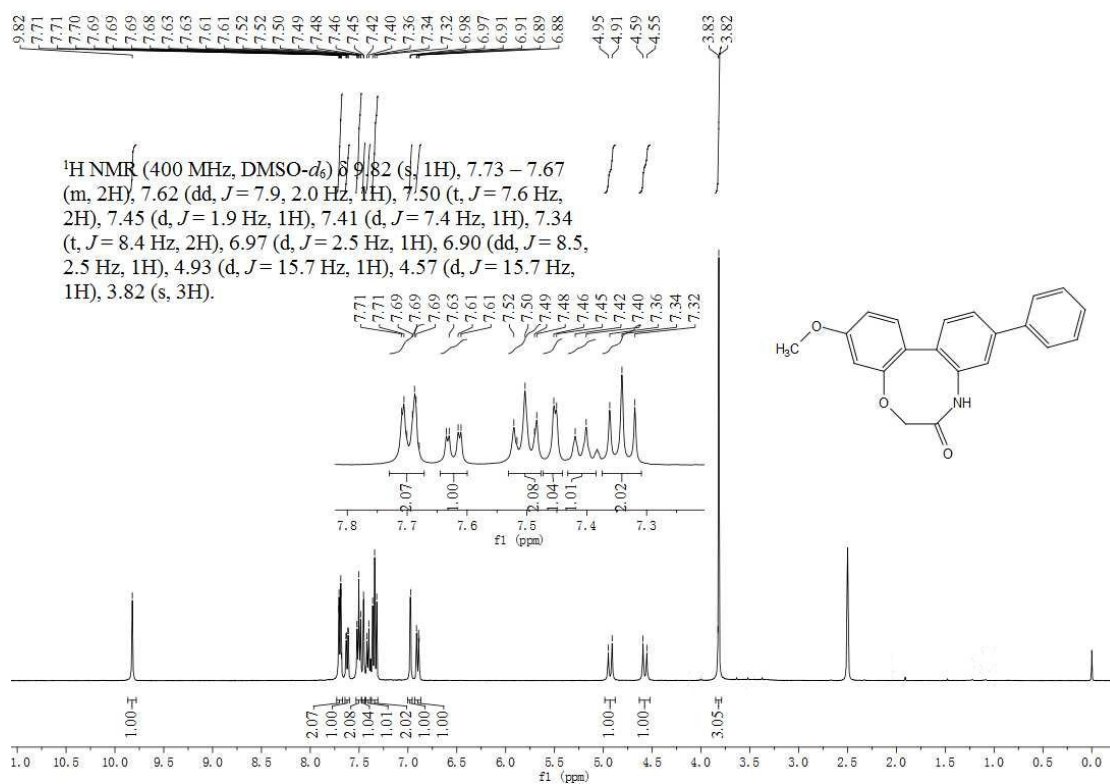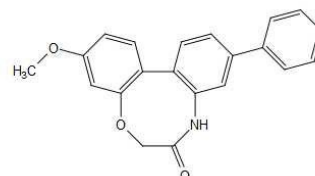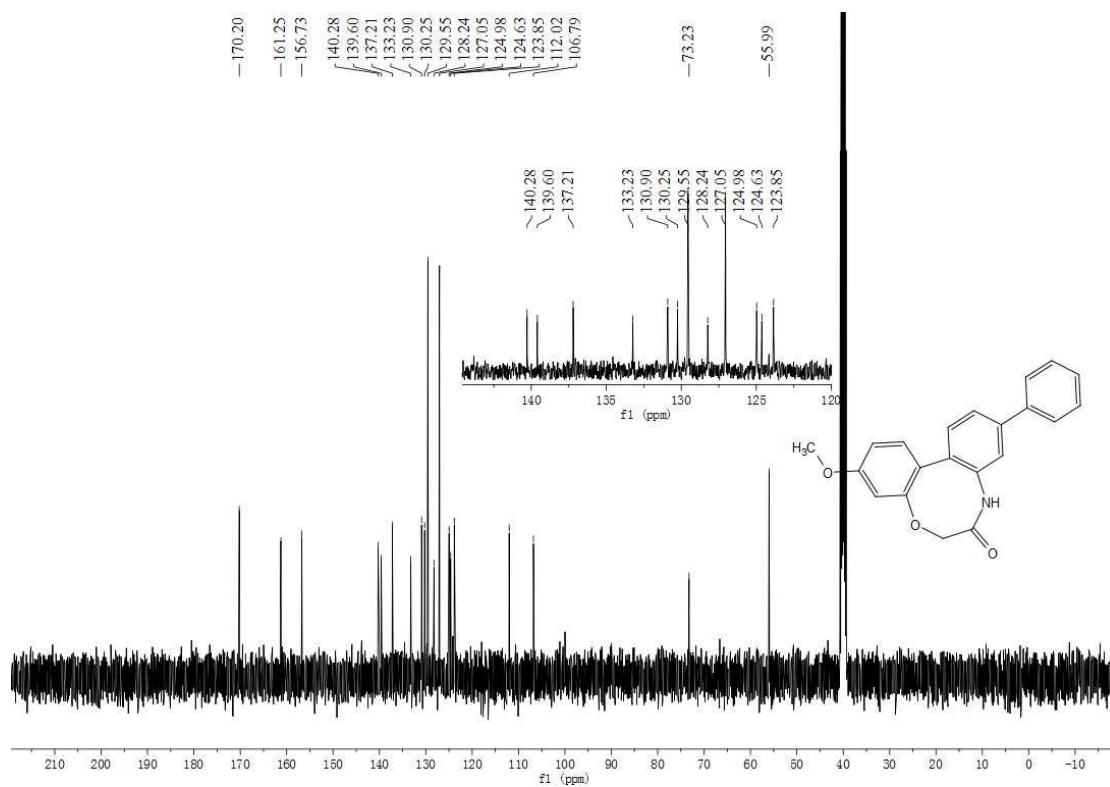

NMR spectra of **2t**

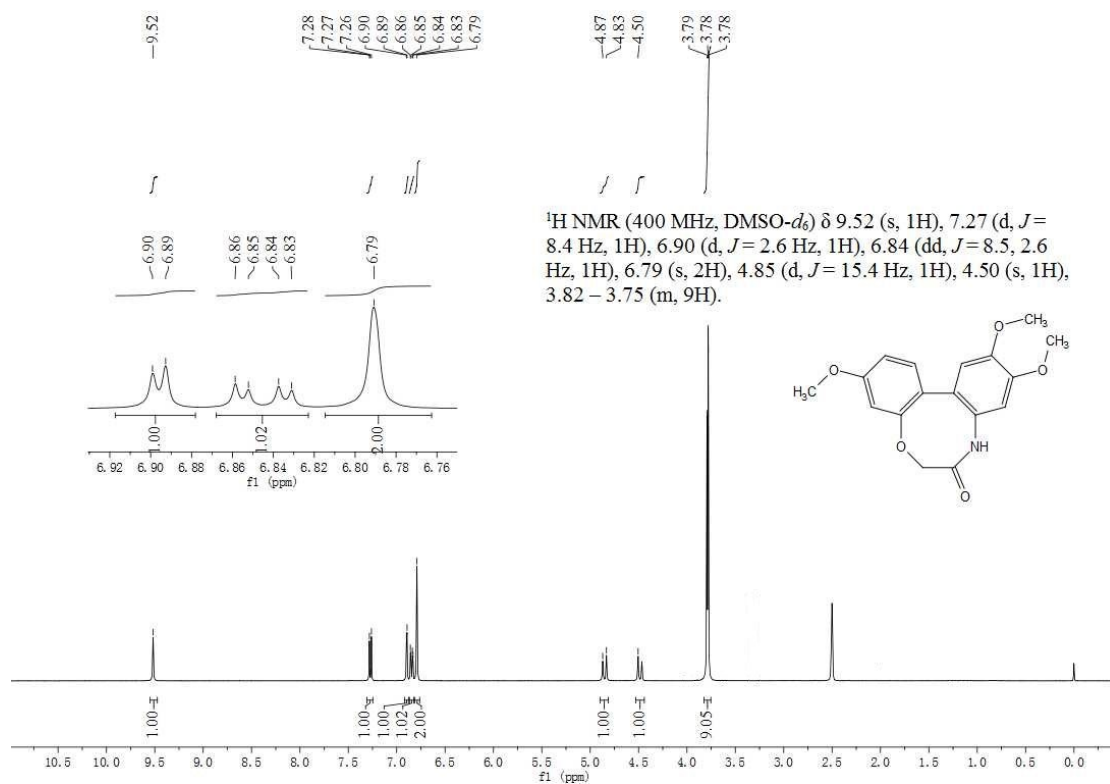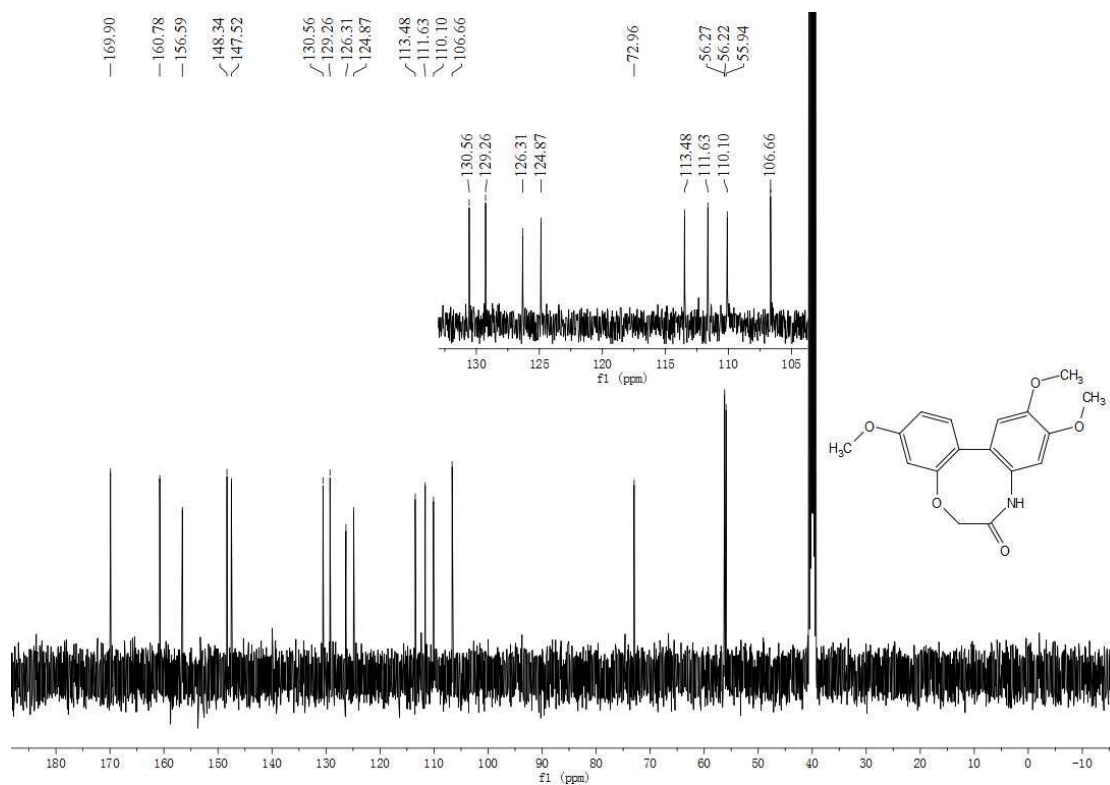



NMR spectra of **2u**

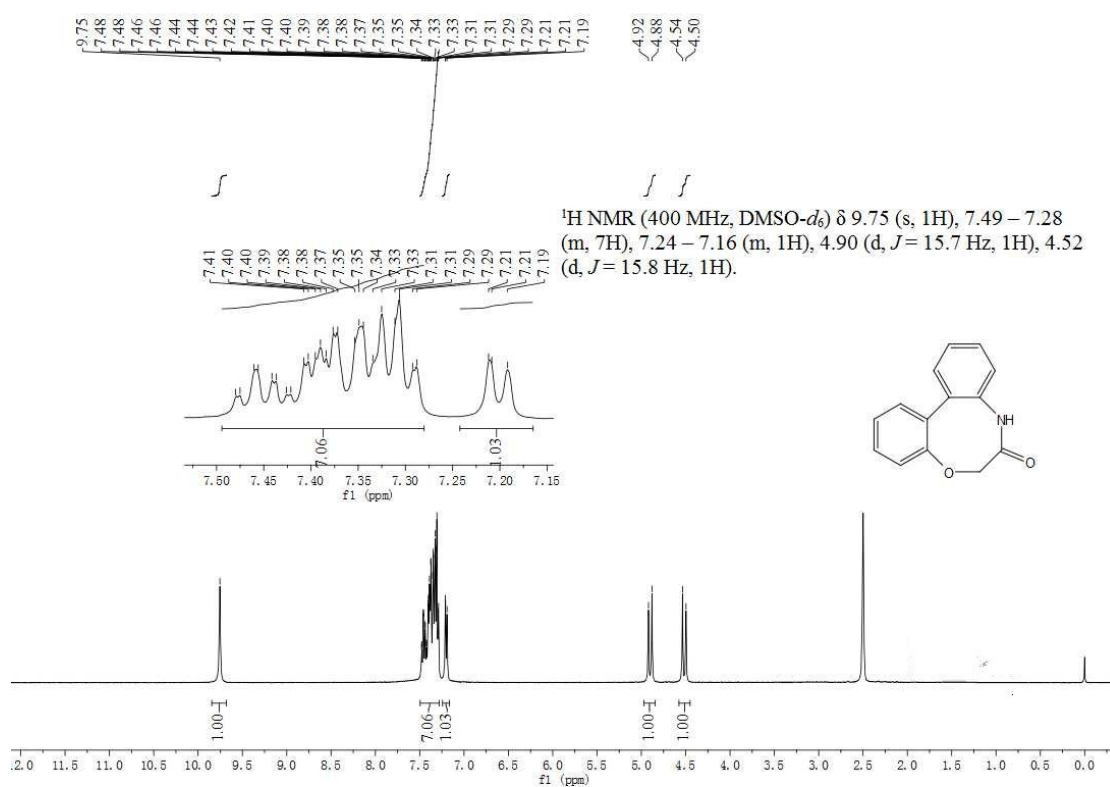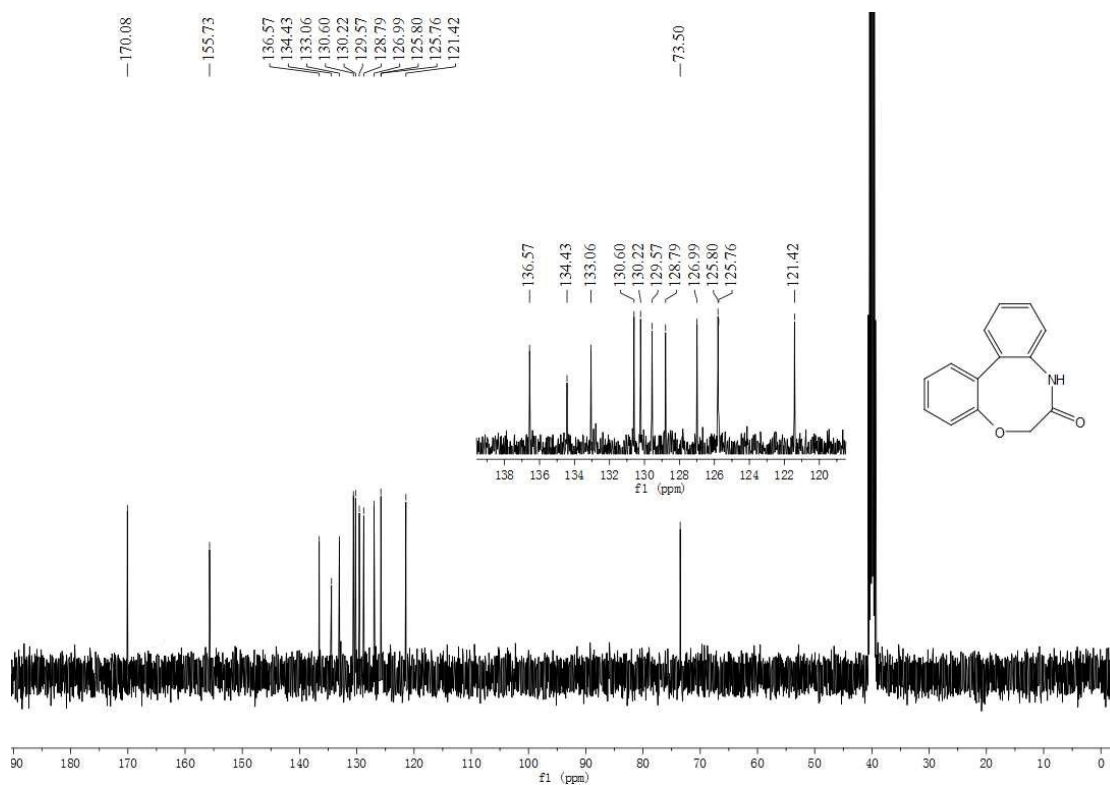

NMR spectra of **2v**

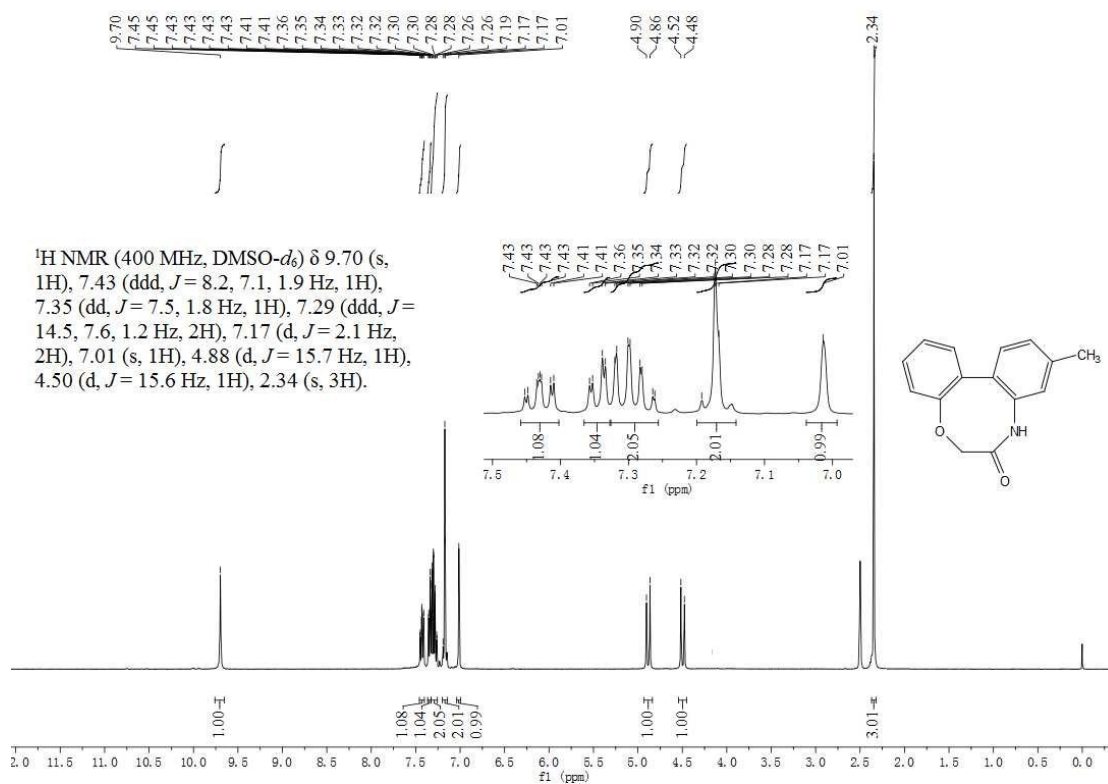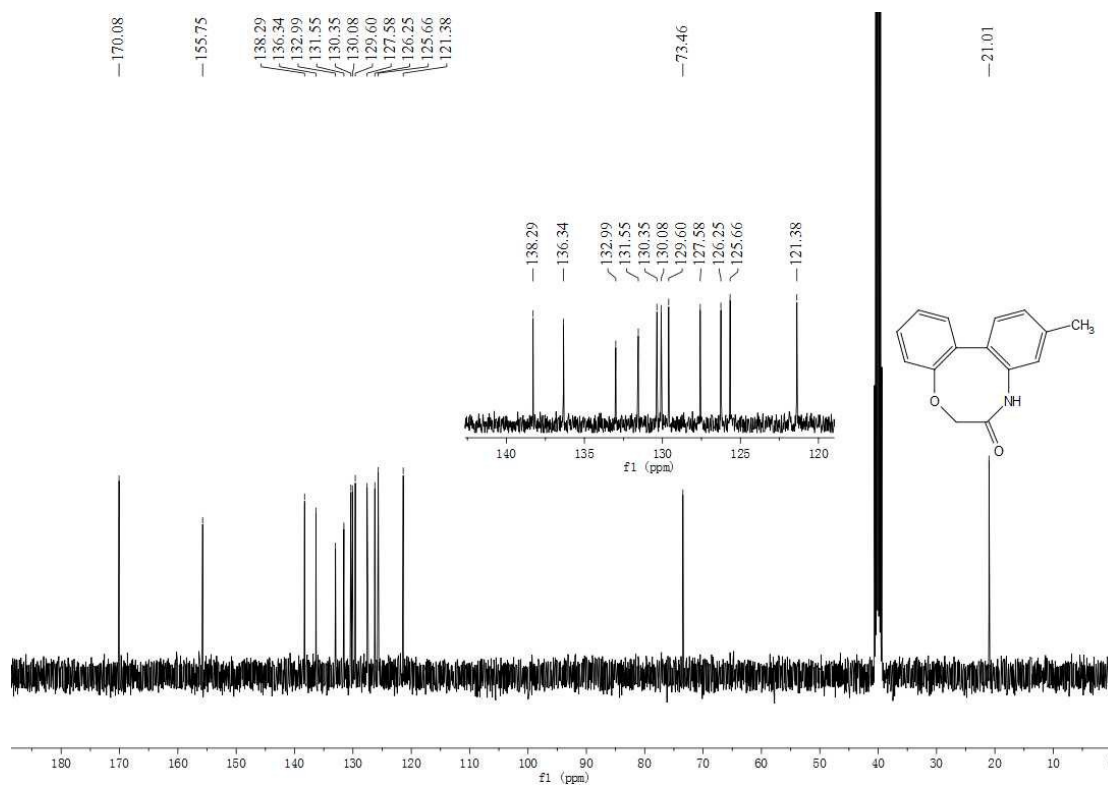

NMR spectra of **2w**

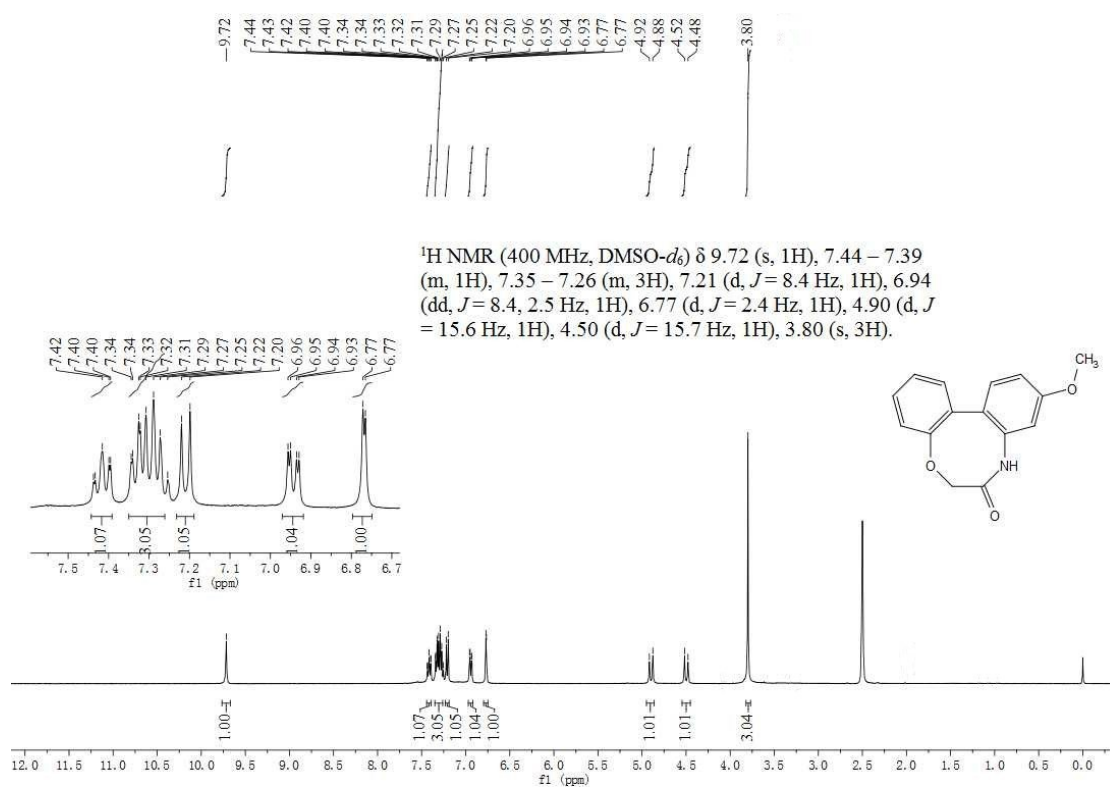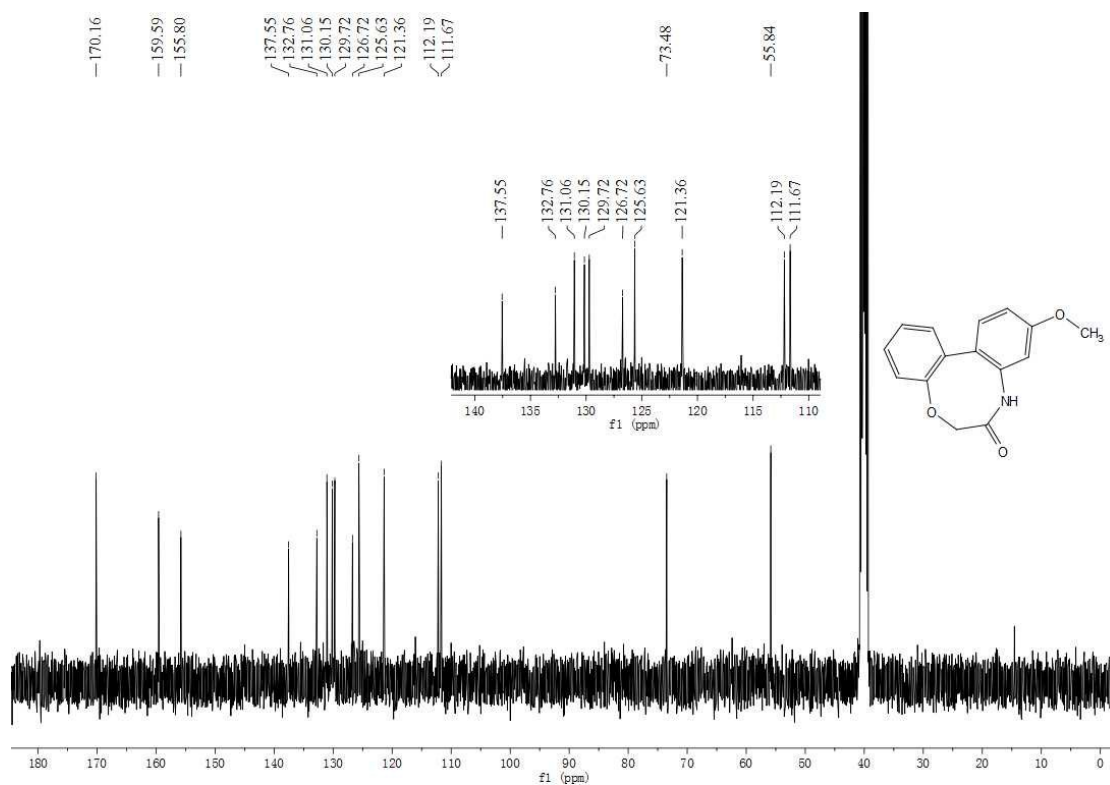

NMR spectra of **2x**

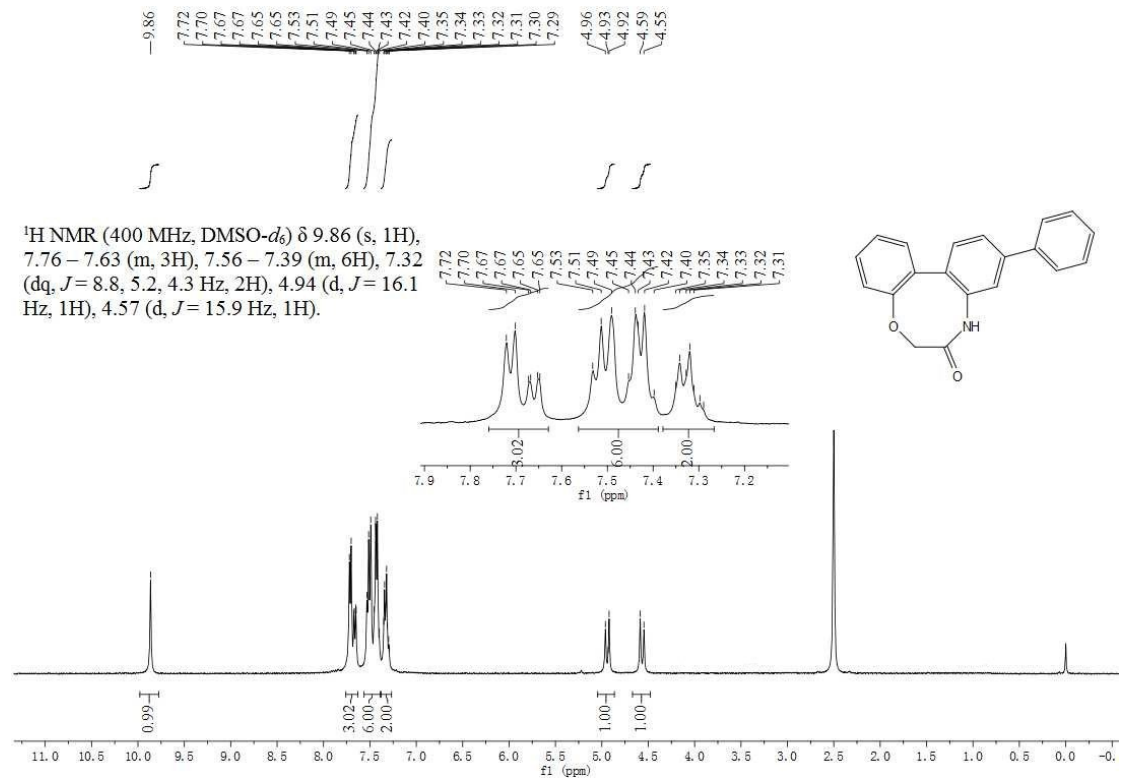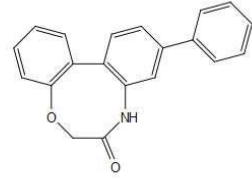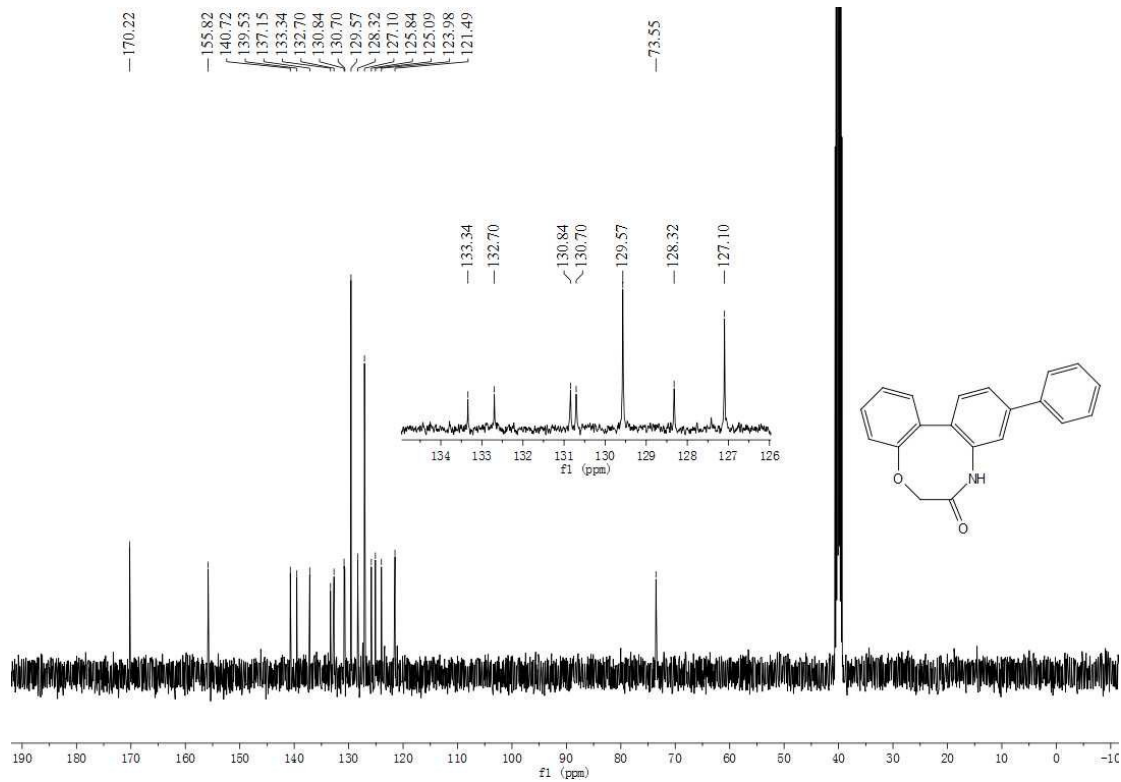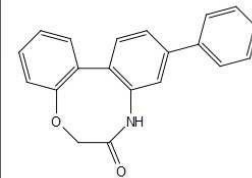

NMR spectra of **2y**

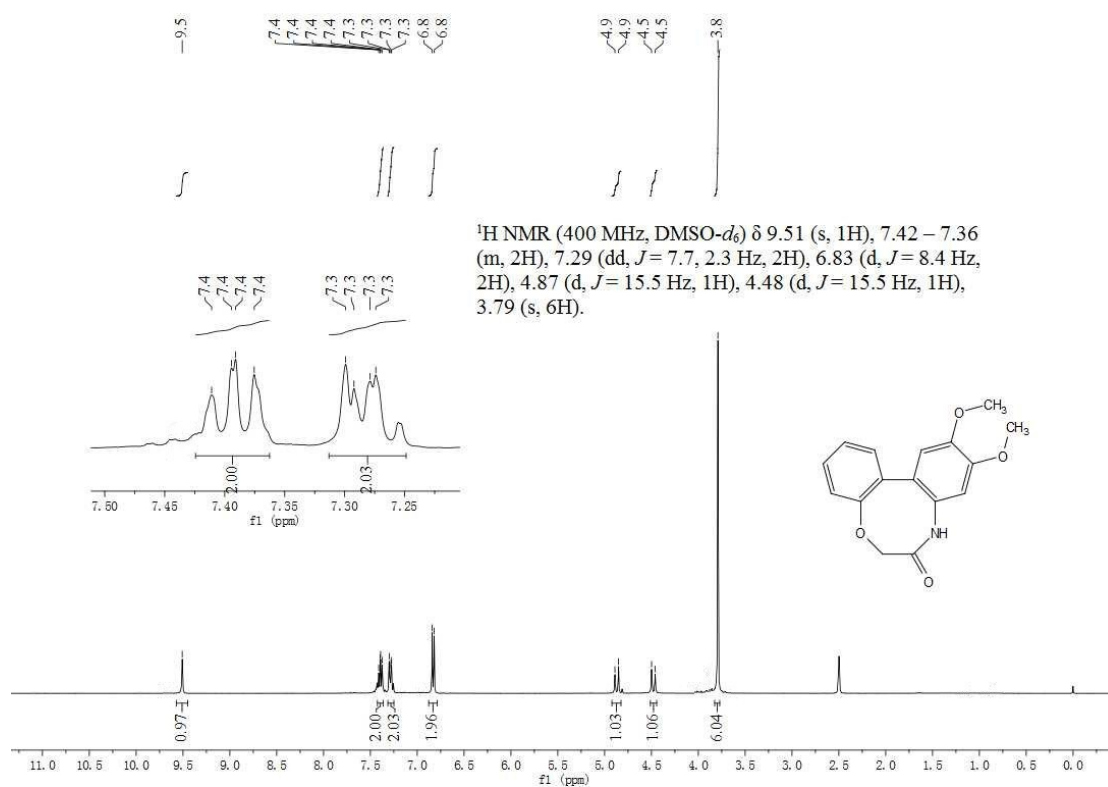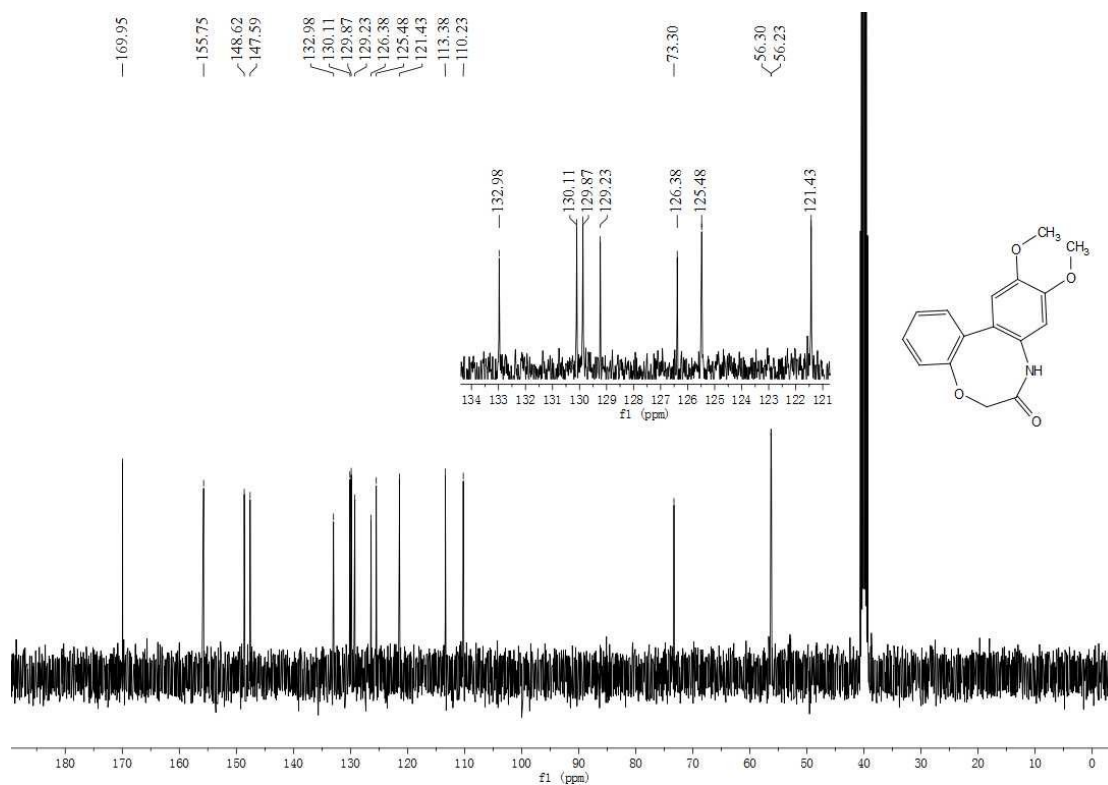

**NMR spectra of 2t'**

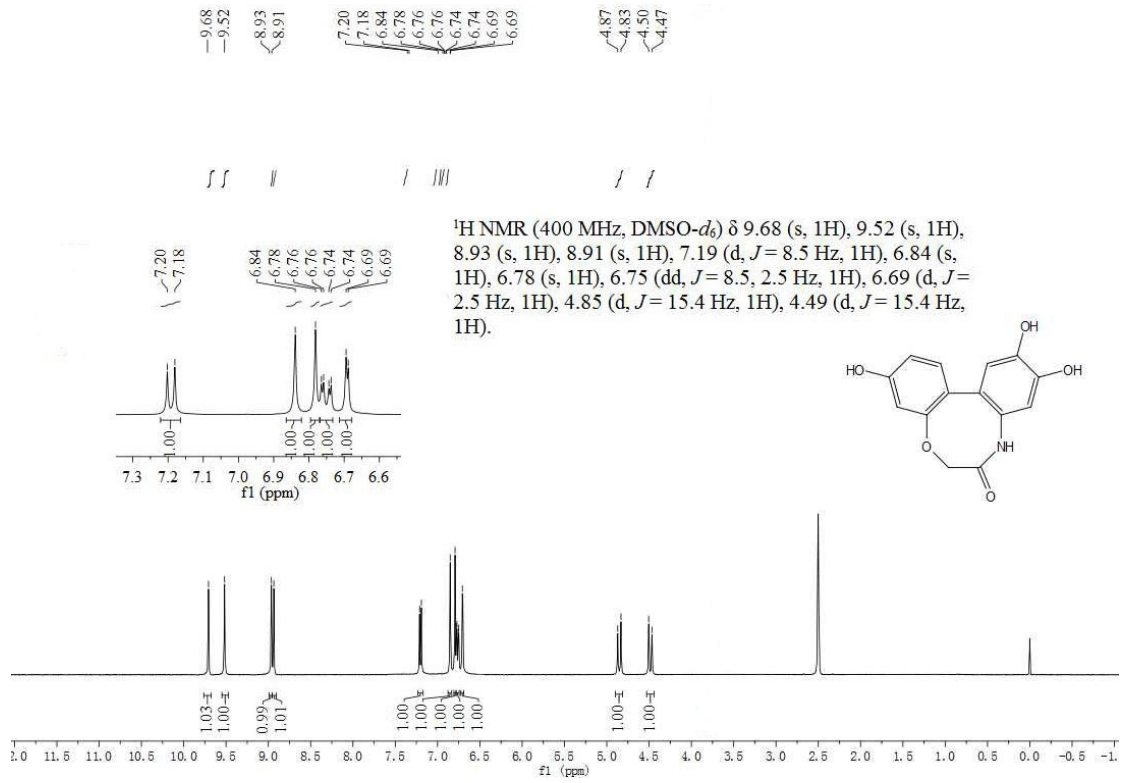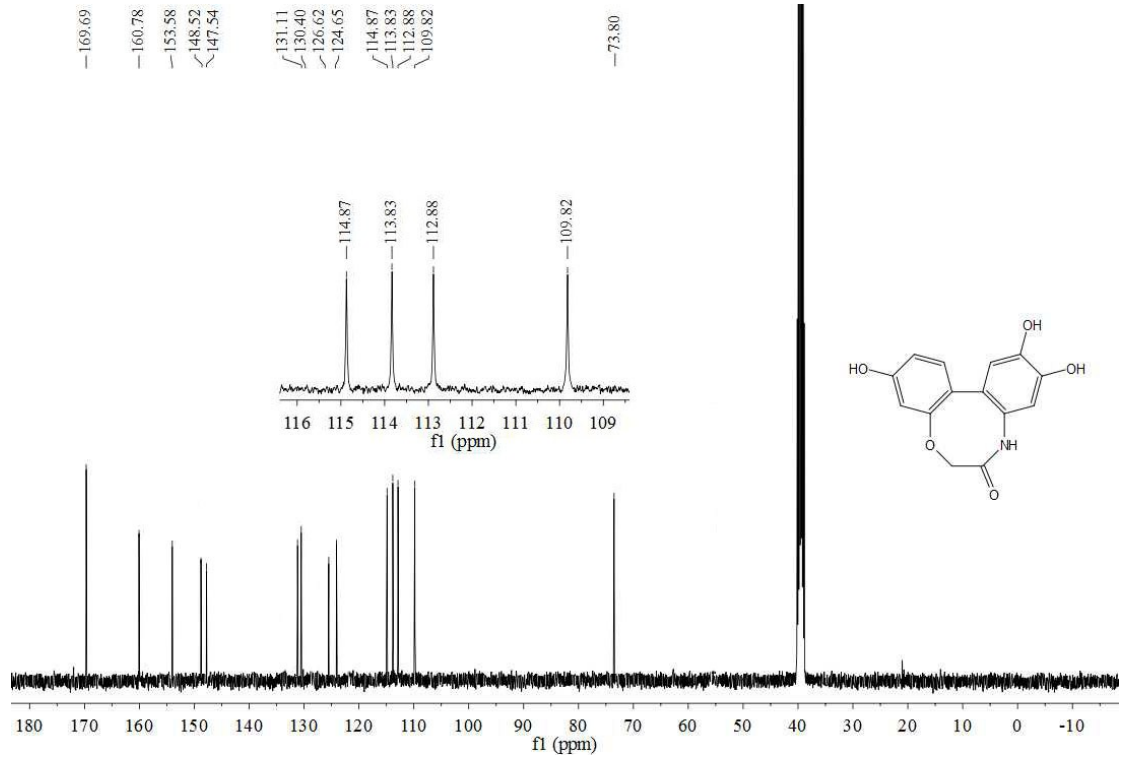

## 10. HPLC spectra for 8-azaprotosappanin A and derivatives (2)

### HPLC spectra of product 2a

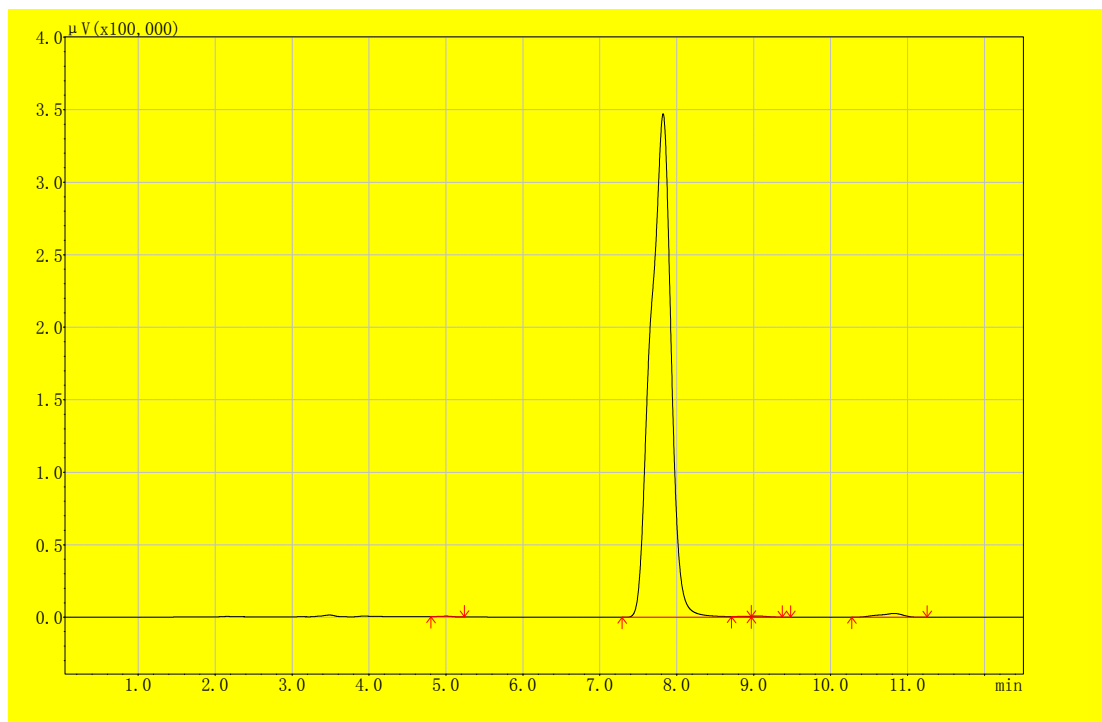

| Peak# | Ret. Time | Area      | Area%   | Height   | Height% |
|-------|-----------|-----------|---------|----------|---------|
| 1     | 5.005     | 5341.8    | 0.0830  | 461.4    | 0.1313  |
| 2     | 7.822     | 6359694.4 | 98.7974 | 347298.4 | 98.8451 |
| 3     | 8.895     | 3439.3    | 0.0534  | 326.0    | 0.0928  |
| 4     | 9.060     | 7180.9    | 0.1116  | 584.4    | 0.1663  |
| 5     | 10.823    | 61447.4   | 0.9546  | 2686.0   | 0.7645  |

### HPLC spectra of product 2b

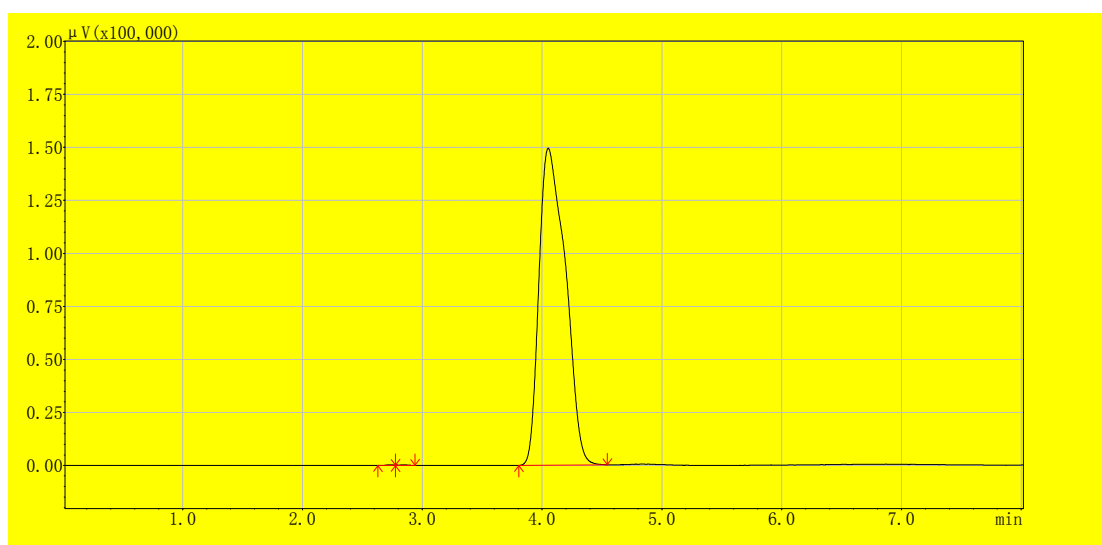

| Peak# | Ret. Time | Area   | Area%  | Height | Height% |
|-------|-----------|--------|--------|--------|---------|
| 1     | 2.715     | 2434.0 | 0.1062 | 421.6  | 0.2807  |

|   |       |           |         |          |         |
|---|-------|-----------|---------|----------|---------|
| 2 | 2.840 | 3040.0    | 0.1326  | 430.4    | 0.2865  |
| 3 | 4.051 | 2287125.0 | 99.7612 | 149375.5 | 99.4328 |

HPLC spectra of product 2c

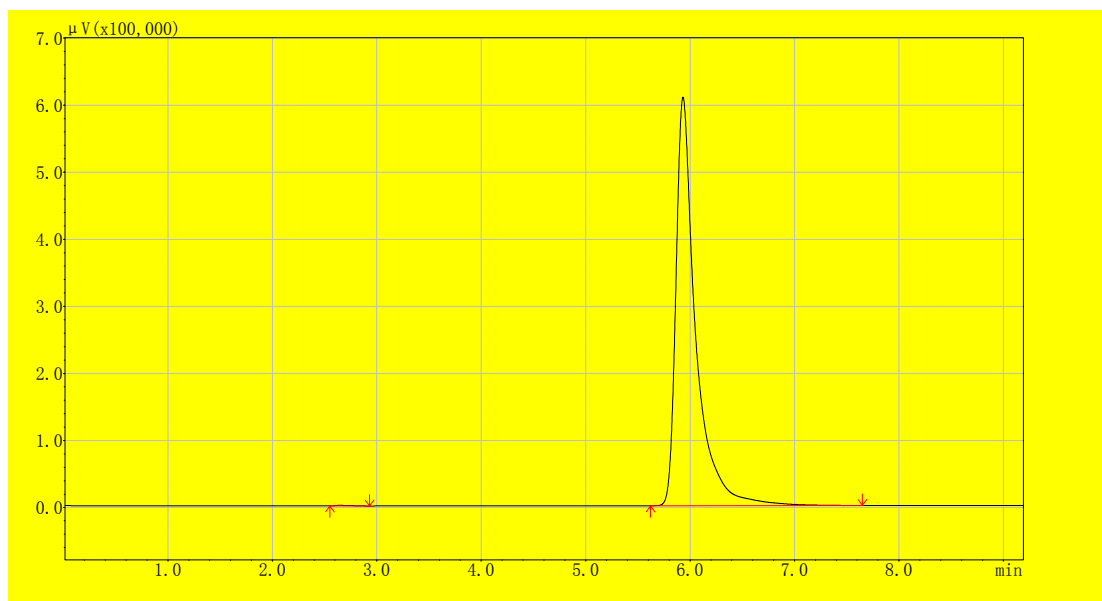

| Peak# | Ret. Time | Area      | Area%   | Height   | Height% |
|-------|-----------|-----------|---------|----------|---------|
| 1     | 2.649     | 9505.8    | 0.1188  | 842.1    | 0.1382  |
| 2     | 5.932     | 7994238.7 | 99.8812 | 608624.8 | 99.8618 |

HPLC spectra of product 2d

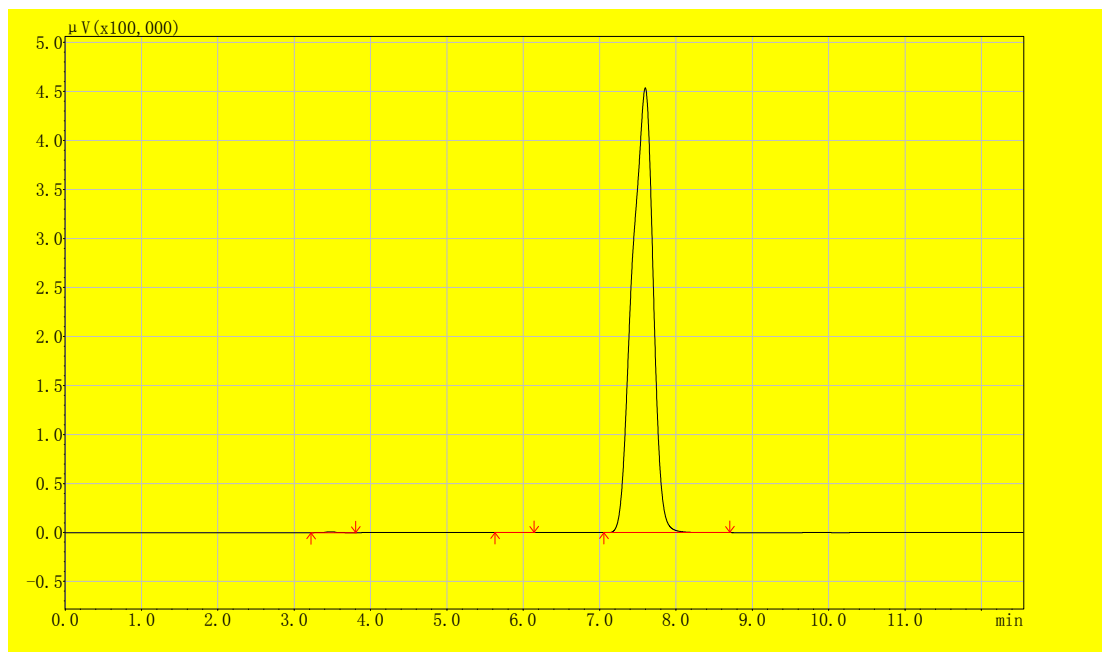

| Peak# | Ret. Time | Area      | Area%   | Height   | Height% |
|-------|-----------|-----------|---------|----------|---------|
| 1     | 3.482     | 14483.7   | 0.1685  | 1187.8   | 0.2608  |
| 2     | 5.892     | 5180.5    | 0.0603  | 353.3    | 0.0776  |
| 3     | 7.598     | 8575936.1 | 99.7712 | 453897.2 | 99.6616 |



### HPLC spectra of product 2e

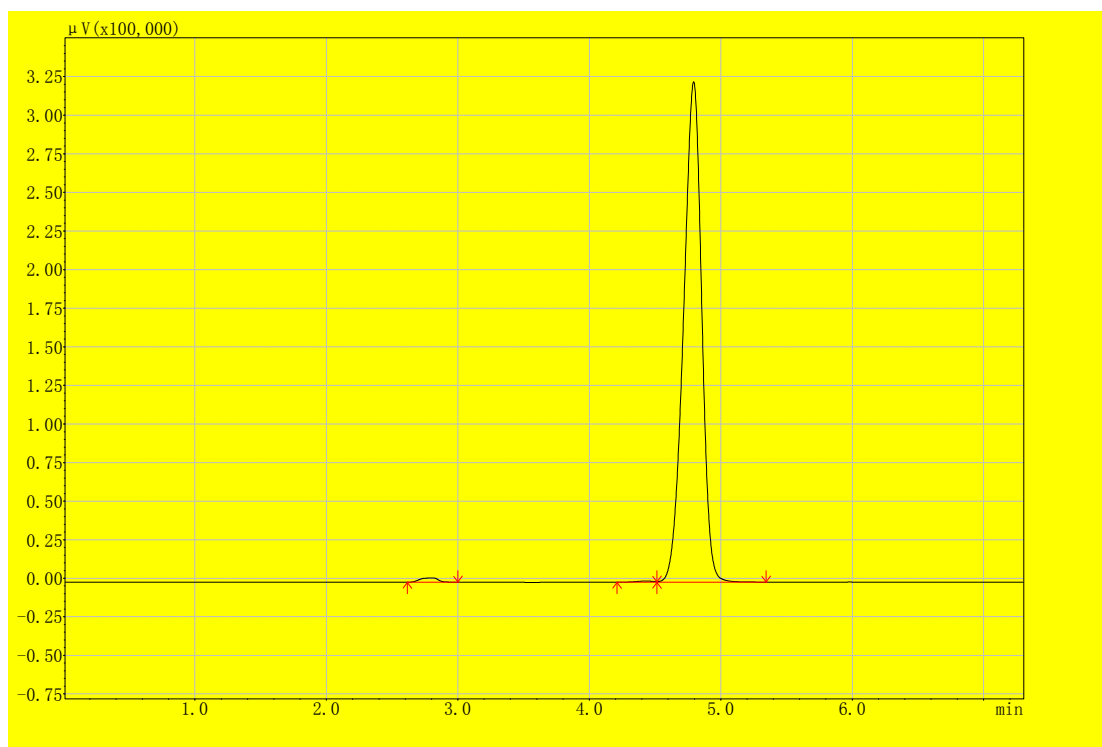

| Peak# | Ret. Time | Area      | Area%   | Height   | Height% |
|-------|-----------|-----------|---------|----------|---------|
| 1     | 2.809     | 26518.0   | 0.8446  | 2928.0   | 0.8928  |
| 2     | 4.432     | 7101.2    | 0.2262  | 791.0    | 0.2412  |
| 3     | 4.794     | 3106005.6 | 98.9292 | 324229.1 | 98.8660 |

### HPLC spectra of product 2f

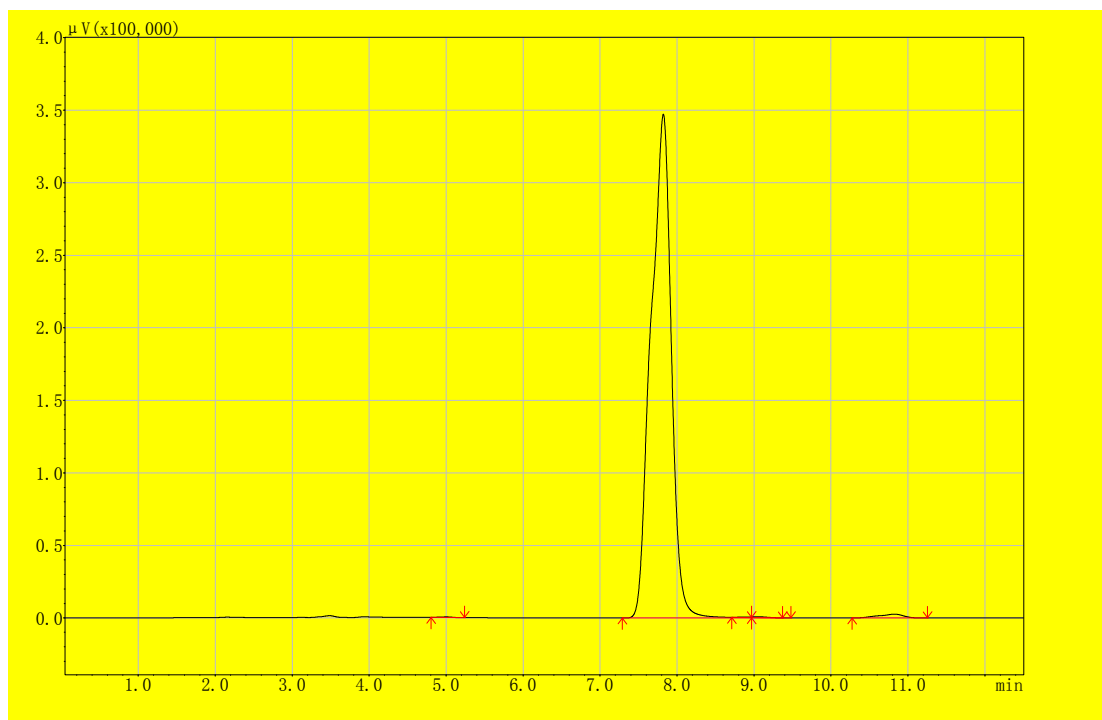

| Peak# | Ret. Time | Area      | Area%   | Height   | Height% |
|-------|-----------|-----------|---------|----------|---------|
| 1     | 5.005     | 5341.8    | 0.0830  | 461.4    | 0.1313  |
| 2     | 7.822     | 6359694.4 | 98.7974 | 347298.4 | 98.8451 |

HPLC spectra of product 2g

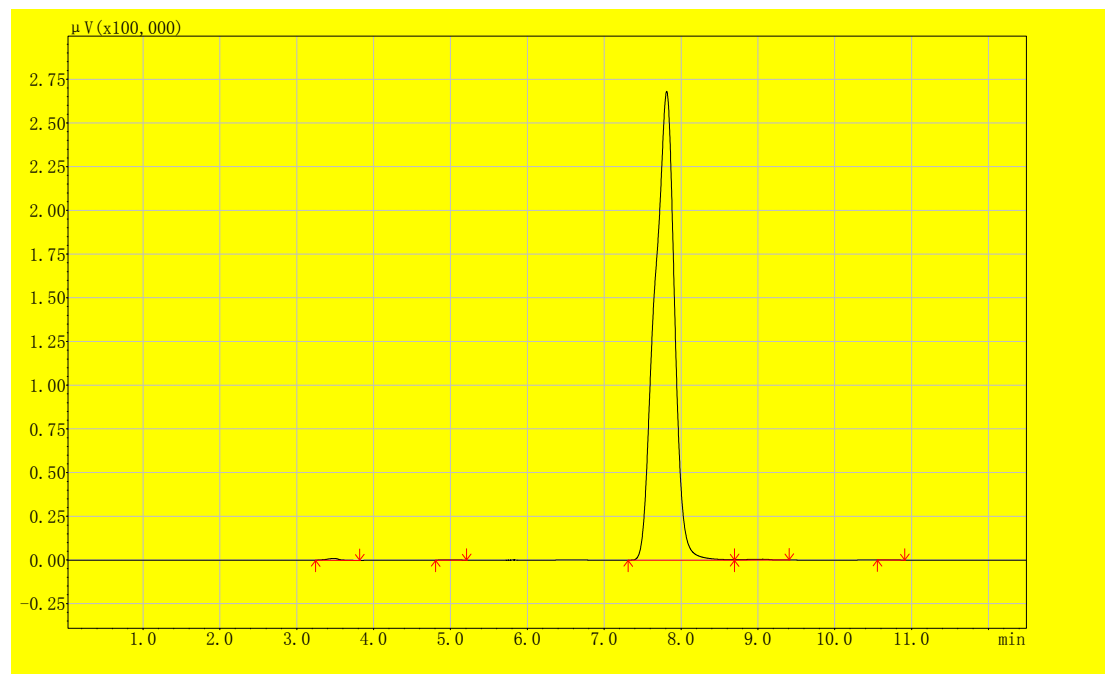

| Peak# | Ret. Time | Area      | Area%   | Height   | Height% |
|-------|-----------|-----------|---------|----------|---------|
| 1     | 3.480     | 15119.5   | 0.3131  | 1210.6   | 0.4476  |
| 2     | 5.016     | 3632.1    | 0.0752  | 317.2    | 0.1173  |
| 3     | 7.813     | 4792365.0 | 99.2488 | 268178.5 | 99.1426 |
| 4     | 9.063     | 15730.3   | 0.3258  | 637.8    | 0.2358  |
| 5     | 10.668    | 1790.3    | 0.0371  | 153.5    | 0.0567  |

HPLC spectra of product 2h

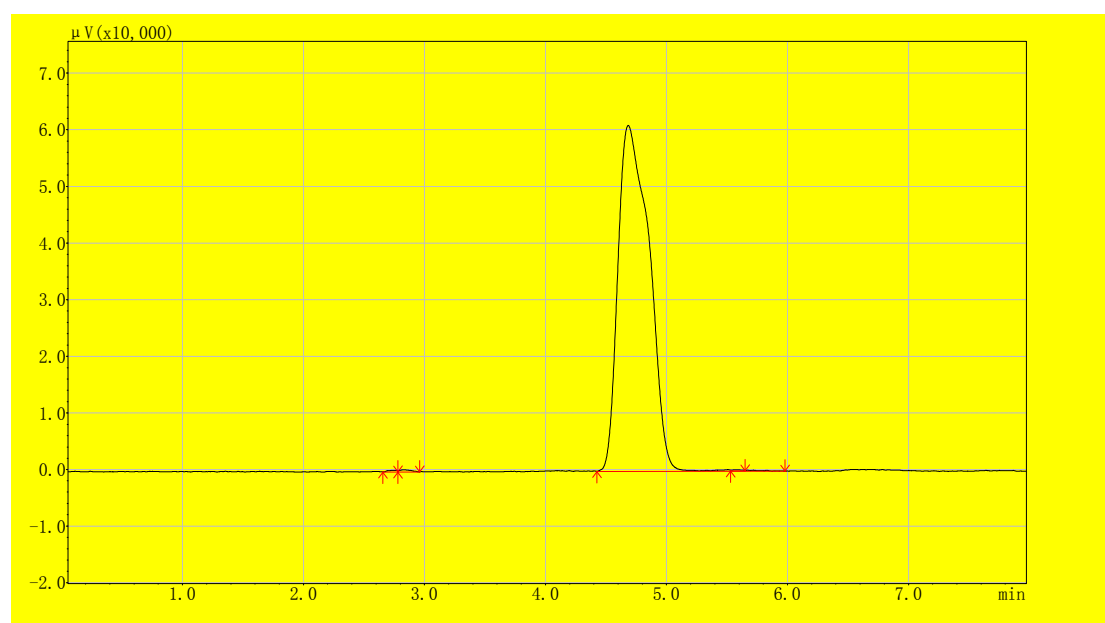

| Peak# | Ret. Time | Area      | Area%   | Height  | Height% |
|-------|-----------|-----------|---------|---------|---------|
| 1     | 2.738     | 1631.4    | 0.1487  | 298.5   | 0.4811  |
| 2     | 2.829     | 2742.6    | 0.2499  | 409.6   | 0.6602  |
| 3     | 4.684     | 1091759.1 | 99.4837 | 61128.4 | 98.5250 |
| 4     | 5.576     | 1291.6    | 0.1177  | 207.0   | 0.3337  |

HPLC spectra of product 2i

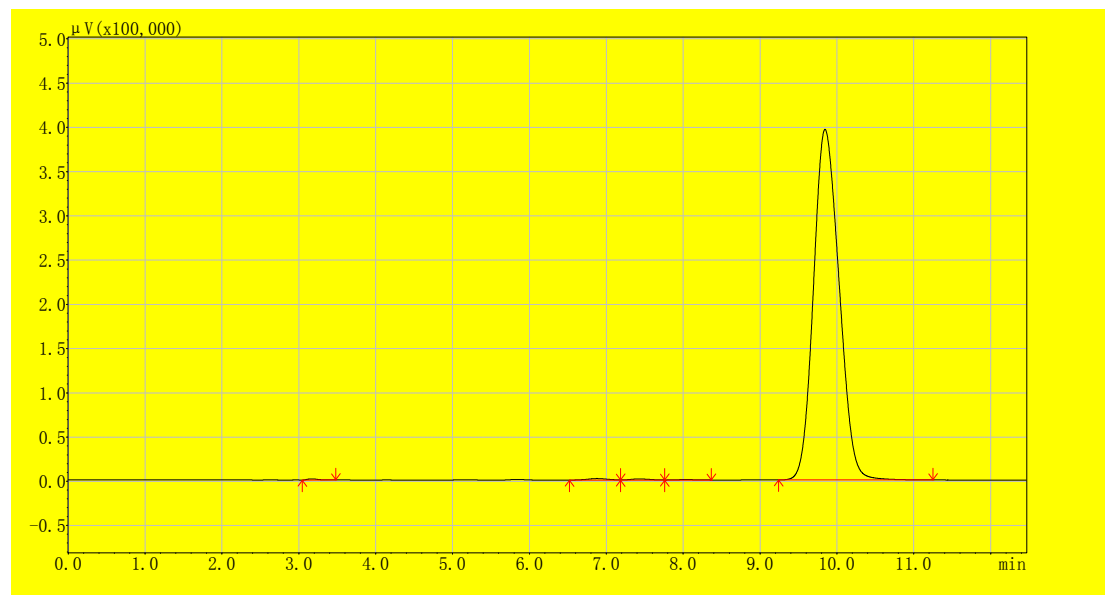

| Peak# | Ret. Time | Area      | Area%   | Height   | Height% |
|-------|-----------|-----------|---------|----------|---------|
| 1     | 3.168     | 12144.2   | 0.1318  | 1264.9   | 0.3156  |
| 2     | 6.878     | 29980.4   | 0.3254  | 1680.3   | 0.4193  |
| 3     | 7.421     | 20661.4   | 0.2243  | 1244.5   | 0.3105  |
| 4     | 8.020     | 7557.7    | 0.0820  | 435.7    | 0.1087  |
| 5     | 9.845     | 9142845.3 | 99.2365 | 396164.6 | 98.8459 |

HPLC spectra of product 2j

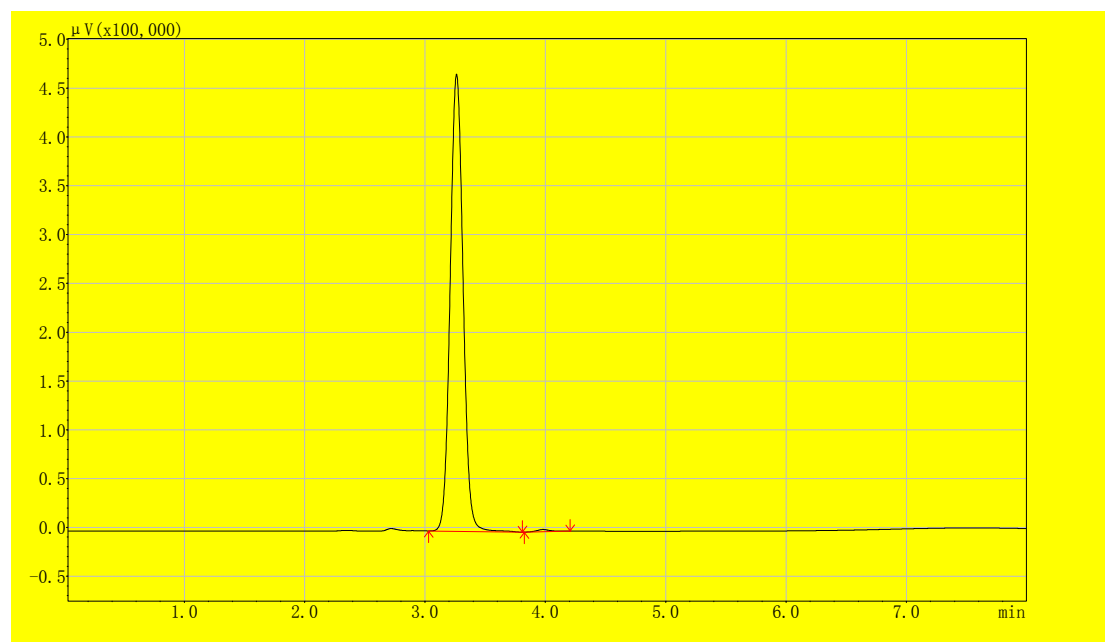

| Peak# | Ret. Time | Area      | Area%   | Height   | Height% |
|-------|-----------|-----------|---------|----------|---------|
| 1     | 3.262     | 3493612.1 | 99.4815 | 468106.9 | 99.5088 |
| 2     | 3.979     | 18208.6   | 0.5185  | 2310.5   | 0.4912  |

HPLC spectra of product 2k

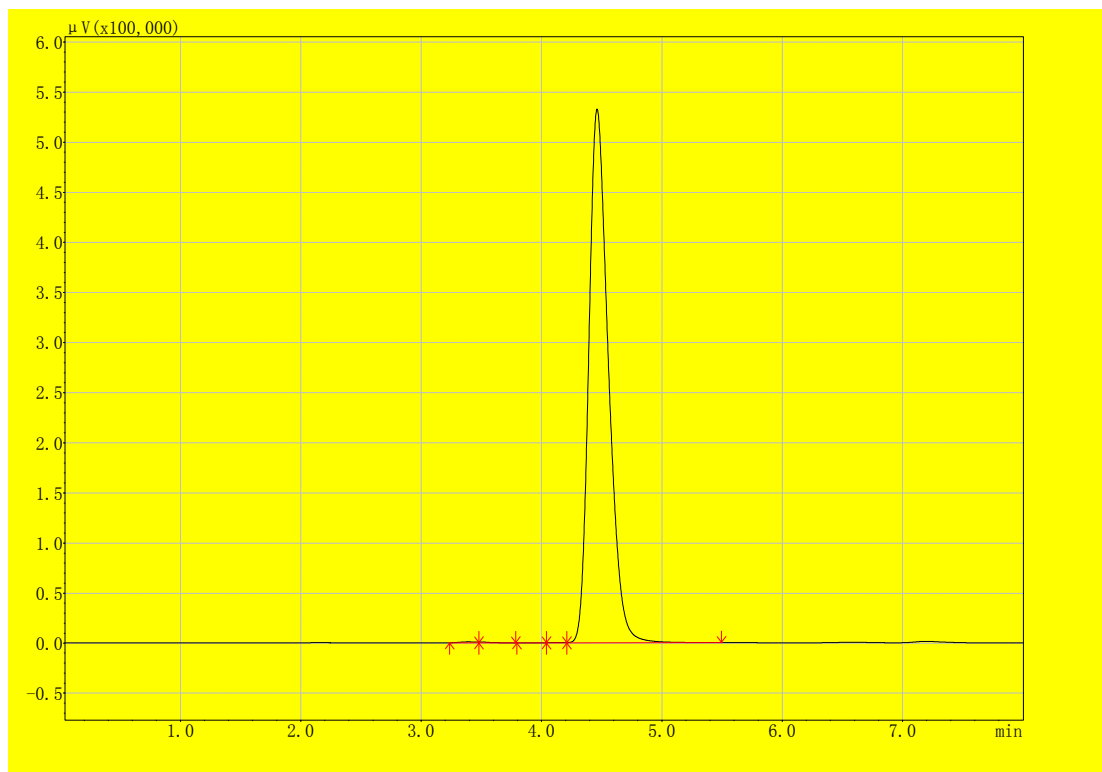

| Peak# | Ret. Time | Area      | Area%   | Height   | Height% |
|-------|-----------|-----------|---------|----------|---------|
| 1     | 3.393     | 8541.4    | 0.1419  | 945.4    | 0.1768  |
| 2     | 3.514     | 5276.7    | 0.0876  | 731.0    | 0.1367  |
| 3     | 3.960     | 1805.9    | 0.0300  | 169.2    | 0.0316  |
| 4     | 4.150     | 2770.4    | 0.0460  | 321.7    | 0.0602  |
| 5     | 4.462     | 6001996.9 | 99.6945 | 532427.3 | 99.5946 |

HPLC spectra of product 2l

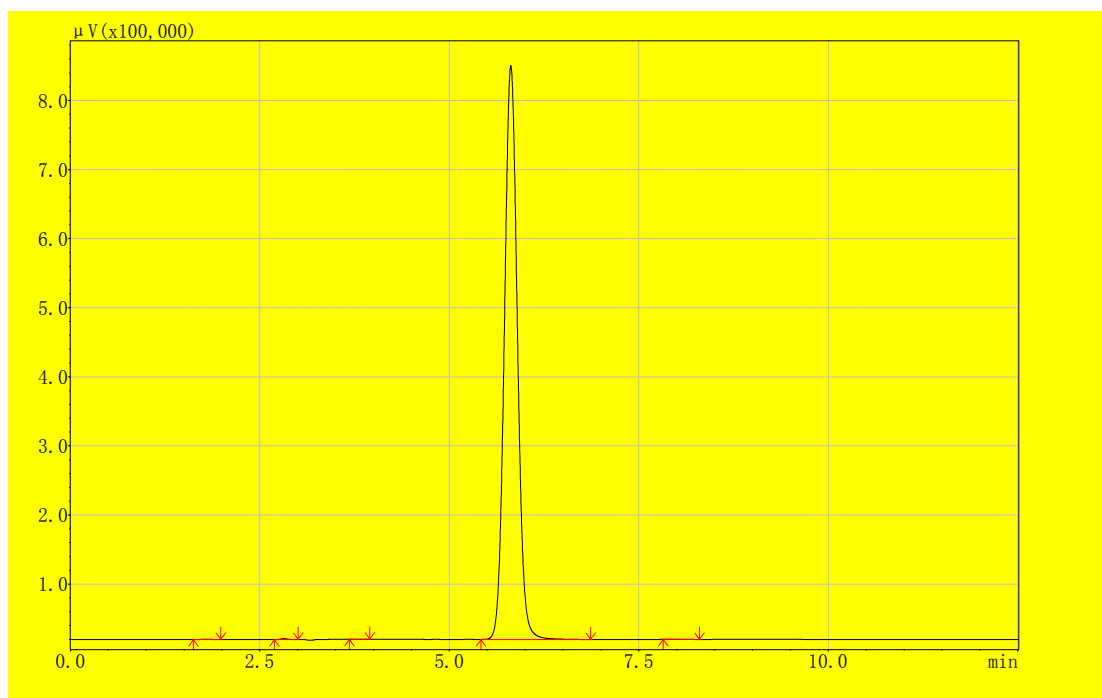

| Peak# | Ret. Time | Area      | Area%   | Height   | Height% |
|-------|-----------|-----------|---------|----------|---------|
| 1     | 1.778     | 2497.5    | 0.0252  | 228.4    | 0.0274  |
| 2     | 2.818     | 6903.4    | 0.0697  | 1149.7   | 0.1382  |
| 3     | 3.811     | 1519.8    | 0.0154  | 201.5    | 0.0242  |
| 4     | 5.810     | 9887438.2 | 99.8633 | 830383.4 | 99.7886 |
| 5     | 8.004     | 2613.4    | 0.0264  | 179.8    | 0.0216  |

HPLC spectra of product 2m

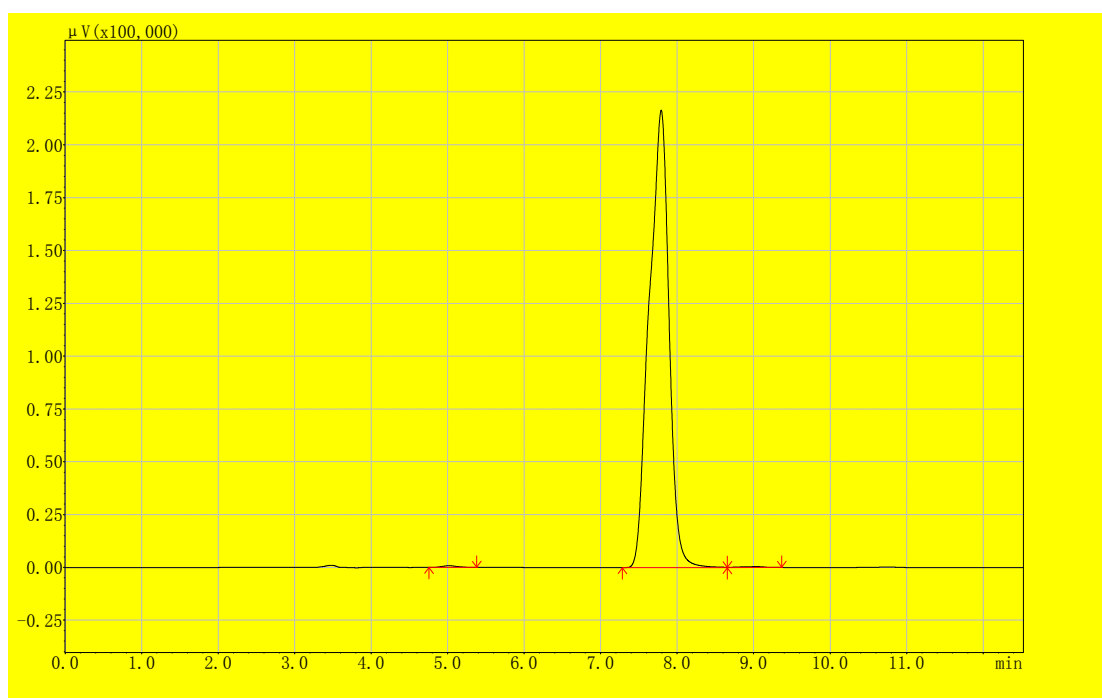

| Peak# | Ret. Time | Area | Area% | Height | Height% |
|-------|-----------|------|-------|--------|---------|
|-------|-----------|------|-------|--------|---------|

|   |       |           |         |          |         |
|---|-------|-----------|---------|----------|---------|
| 1 | 5.018 | 13985.5   | 0.3561  | 922.8    | 0.4232  |
| 2 | 7.791 | 3899354.8 | 99.2784 | 216509.2 | 99.3045 |
| 3 | 9.037 | 14357.1   | 0.3655  | 593.5    | 0.2722  |

HPLC spectra of product **2n**

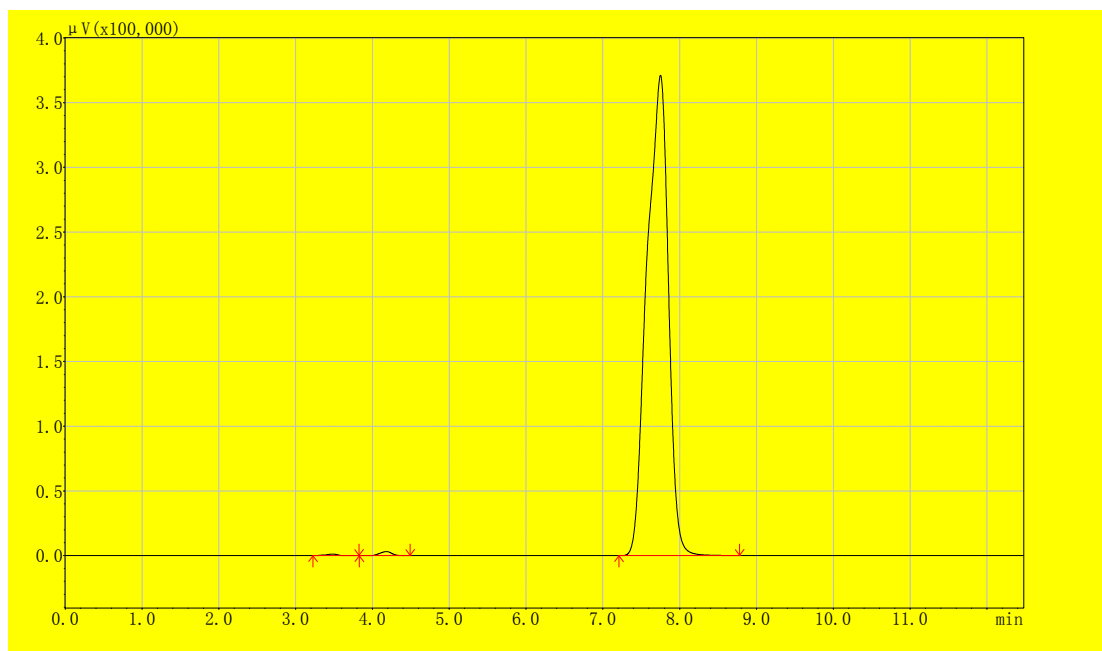

| Peak# | Ret. Time | Area      | Area%   | Height   | Height% |
|-------|-----------|-----------|---------|----------|---------|
| 1     | 3.484     | 15716.0   | 0.2171  | 1308.2   | 0.3482  |
| 2     | 4.182     | 37309.4   | 0.5154  | 3294.5   | 0.8769  |
| 3     | 7.750     | 7185485.7 | 99.2675 | 371085.2 | 98.7749 |

HPLC spectra of product **2o**

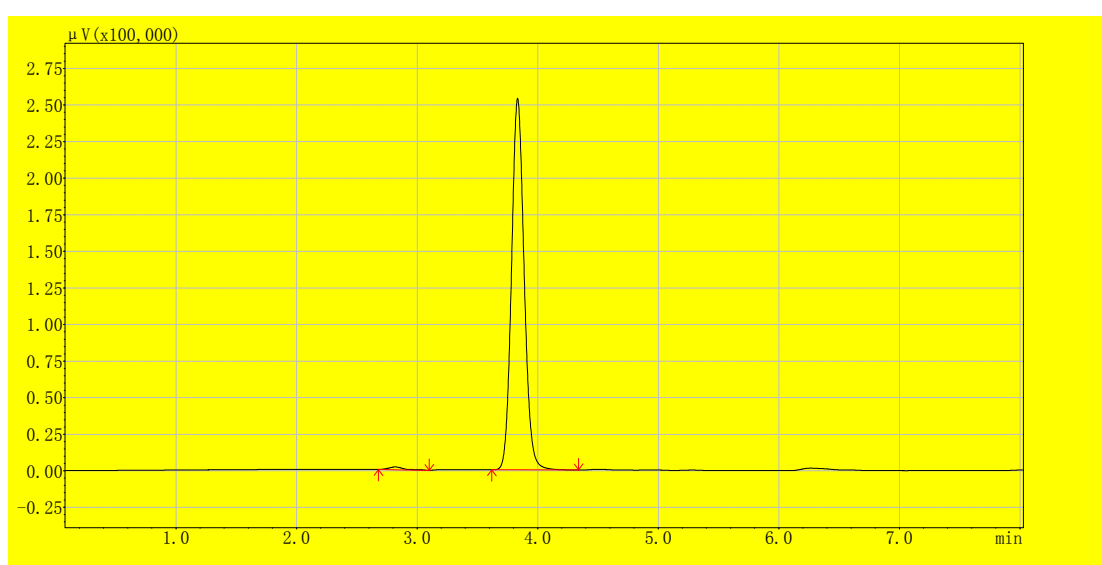

| Peak# | Ret. Time | Area      | Area%   | Height   | Height% |
|-------|-----------|-----------|---------|----------|---------|
| 1     | 2.817     | 17744.4   | 0.9394  | 1940.7   | 0.7562  |
| 2     | 3.833     | 1850514.4 | 97.9718 | 253695.5 | 98.8584 |
| 3     | 14.065    | 20564.9   | 1.0888  | 988.9    | 0.3854  |

### HPLC spectra of product 2p

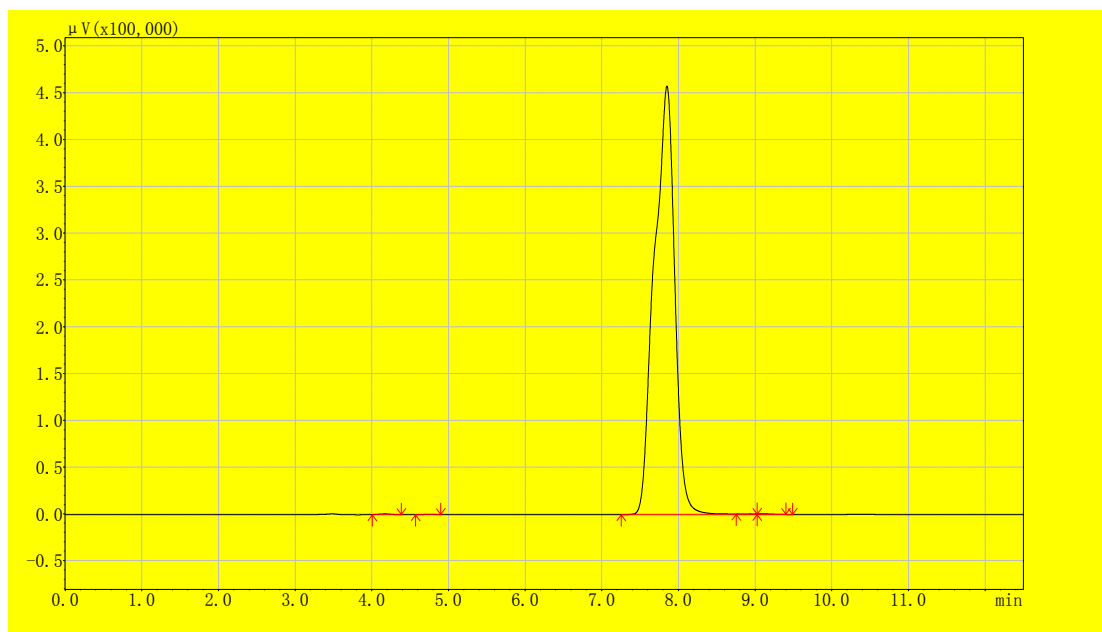

| Peak# | Ret. Time | Area      | Area%   | Height   | Height% |
|-------|-----------|-----------|---------|----------|---------|
| 1     | 4.176     | 7529.3    | 0.0882  | 746.3    | 0.1623  |
| 2     | 4.770     | 2126.5    | 0.0249  | 213.1    | 0.0464  |
| 3     | 7.850     | 8522284.2 | 99.7814 | 458063.4 | 99.6277 |
| 4     | 8.915     | 3069.8    | 0.0359  | 253.2    | 0.0551  |
| 5     | 9.113     | 5948.5    | 0.0696  | 498.9    | 0.1085  |

### HPLC spectra of product 2q

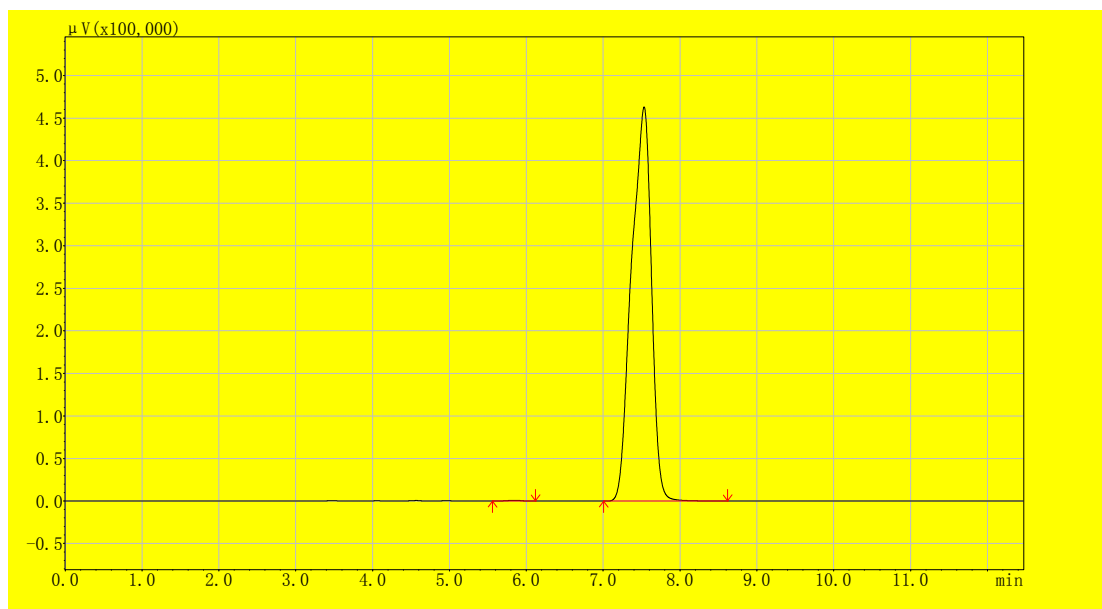

| Peak# | Ret. Time | Area      | Area%   | Height   | Height% |
|-------|-----------|-----------|---------|----------|---------|
| 1     | 5.857     | 14455.4   | 0.1734  | 1015.7   | 0.2188  |
| 2     | 7.532     | 8323202.1 | 99.8266 | 463191.7 | 99.7812 |

### HPLC spectra of product 2r

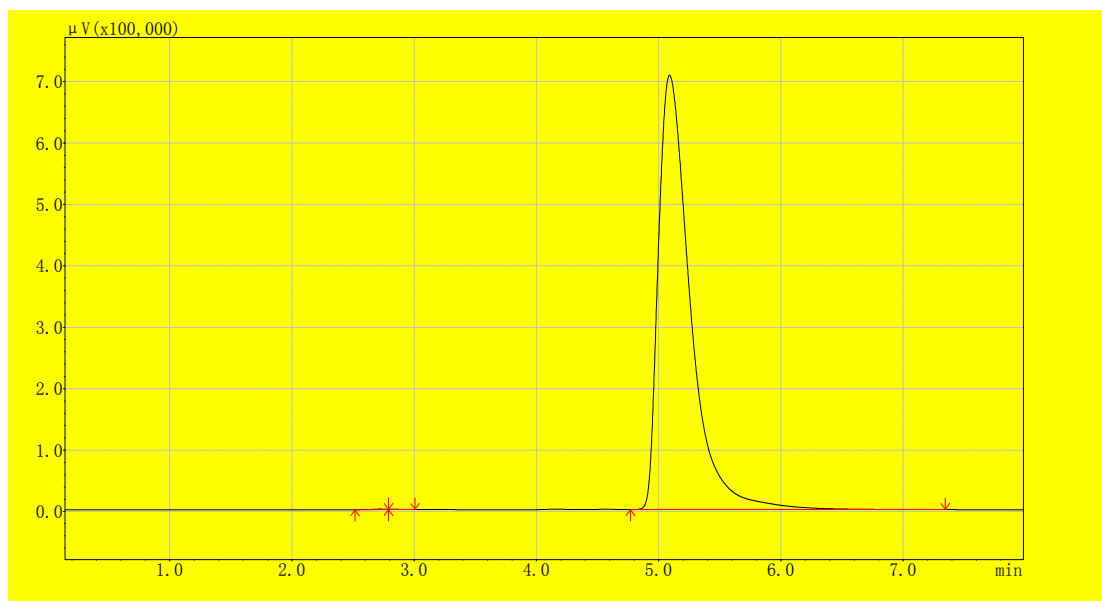

| Peak# | Ret. Time | Area       | Area%   | Height   | Height% |
|-------|-----------|------------|---------|----------|---------|
| 1     | 2.718     | 7361.3     | 0.0572  | 932.2    | 0.1315  |
| 2     | 2.820     | 4323.2     | 0.0336  | 778.3    | 0.1098  |
| 3     | 5.089     | 12850417.5 | 99.9092 | 707180.4 | 99.7587 |

### HPLC spectra of product 2s

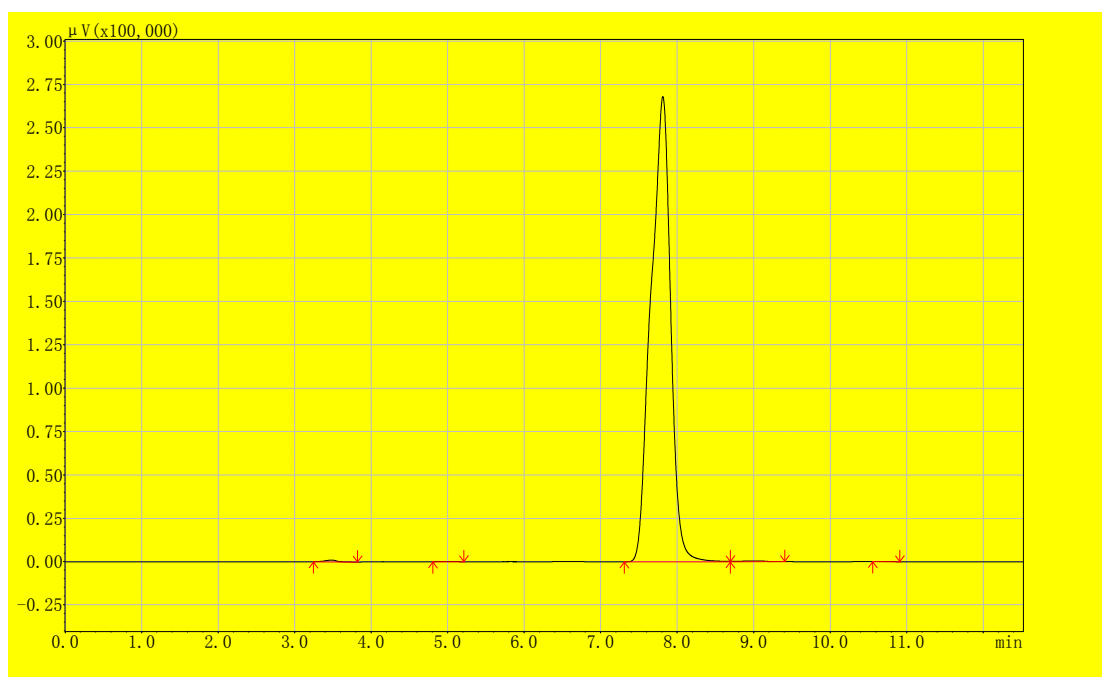

| Peak# | Ret. Time | Area      | Area%   | Height   | Height% |
|-------|-----------|-----------|---------|----------|---------|
| 1     | 3.480     | 15119.5   | 0.3131  | 1210.6   | 0.4476  |
| 2     | 5.016     | 3632.1    | 0.0752  | 317.2    | 0.1173  |
| 3     | 7.813     | 4792365.0 | 99.2488 | 268178.5 | 99.1426 |
| 4     | 9.063     | 15730.3   | 0.3258  | 637.8    | 0.2358  |



5      10.668      1790.3      0.0371      153.5      0.0567

HPLC spectra of product 2t

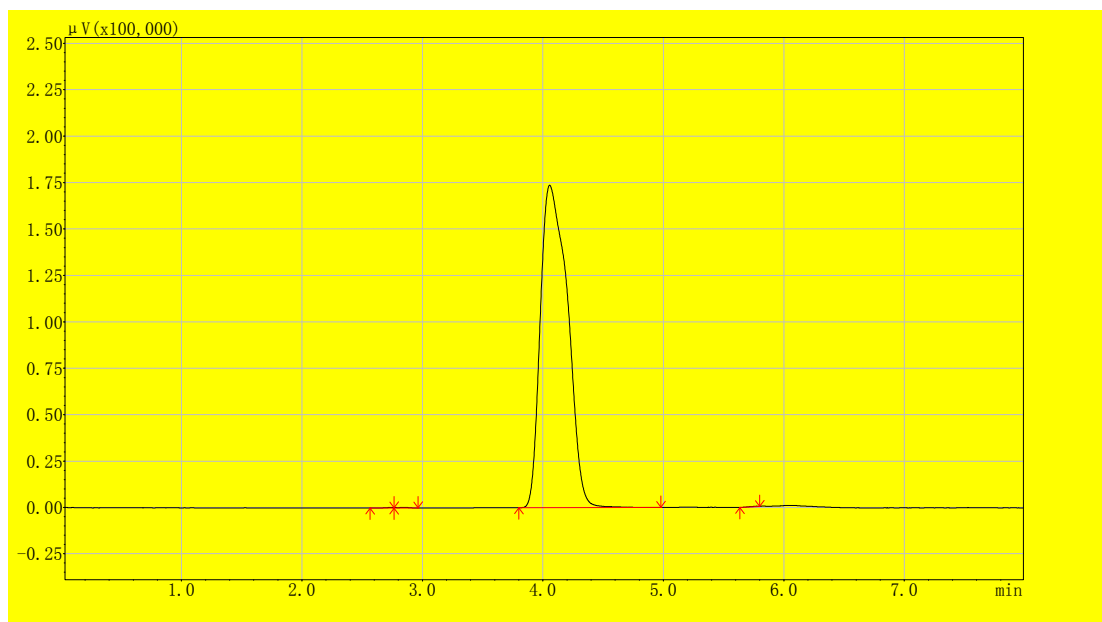

| Peak# | Ret. Time | Area      | Area%   | Height   | Height% |
|-------|-----------|-----------|---------|----------|---------|
| 1     | 2.730     | 1463.7    | 0.0537  | 293.6    | 0.1681  |
| 2     | 2.855     | 2513.2    | 0.0921  | 318.3    | 0.1822  |
| 3     | 4.056     | 2721986.9 | 99.7835 | 173737.4 | 99.4570 |
| 4     | 5.775     | 1928.7    | 0.0707  | 336.5    | 0.1926  |

HPLC spectra of product 2u

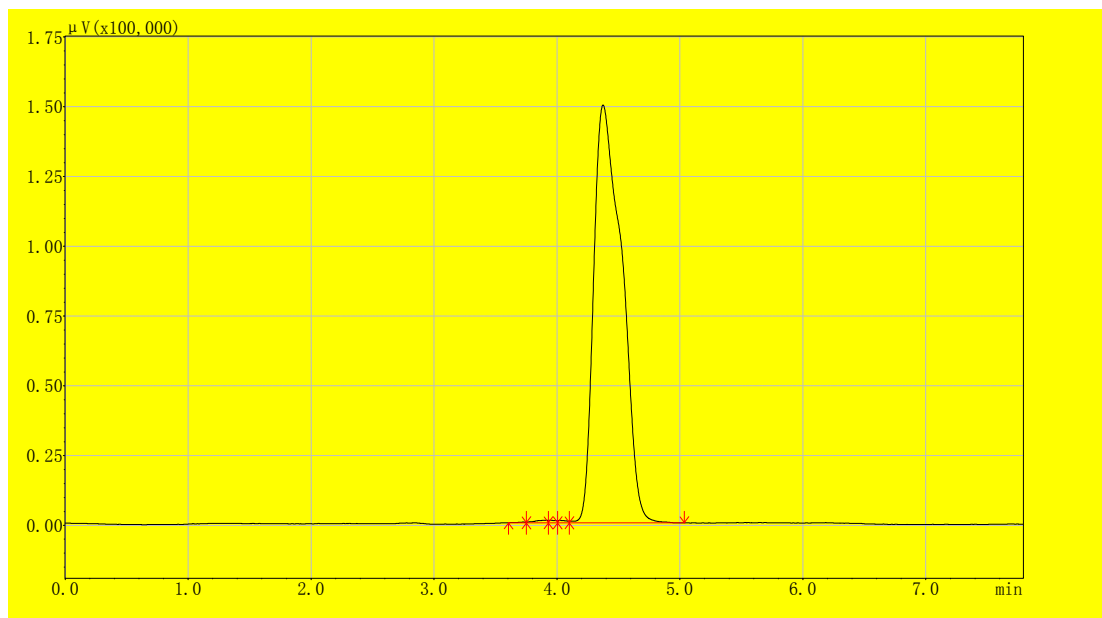

| Peak# | Ret. Time | Area   | Area%  | Height | Height% |
|-------|-----------|--------|--------|--------|---------|
| 1     | 3.724     | 1168.2 | 0.0489 | 261.5  | 0.1714  |
| 2     | 3.898     | 6975.6 | 0.2917 | 904.3  | 0.5925  |
| 3     | 3.955     | 3800.6 | 0.1589 | 877.3  | 0.5748  |
| 4     | 4.028     | 4336.2 | 0.1813 | 878.6  | 0.5756  |

5      4.375      2375153.0      99.3192      149705.7      98.0857

HPLC spectra of product 2v

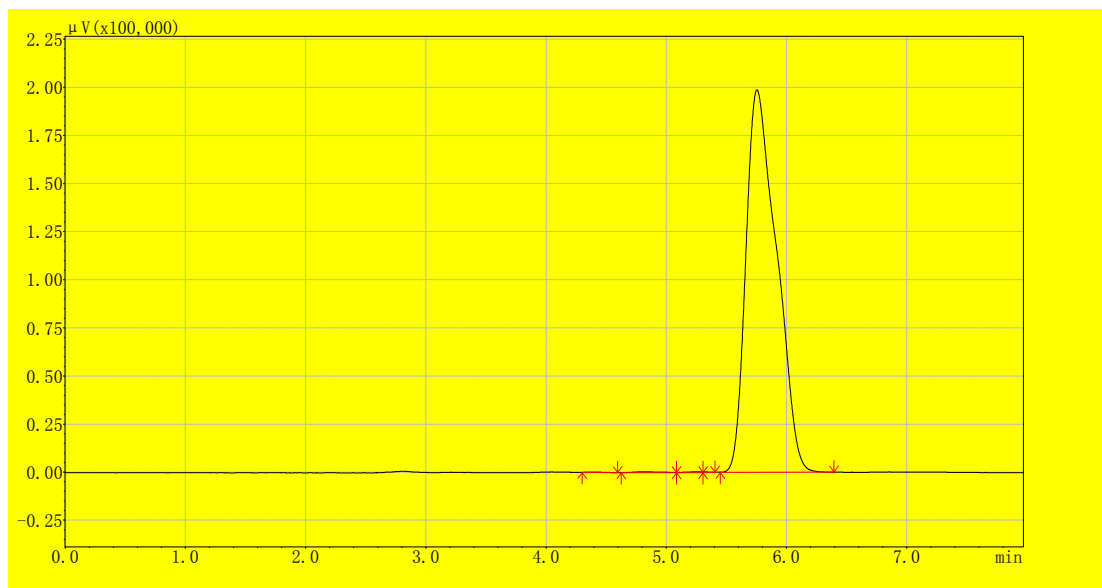

| Peak# | Ret. Time | Area      | Area%   | Height   | Height% |
|-------|-----------|-----------|---------|----------|---------|
| 1     | 4.391     | 2149.8    | 0.0608  | 232.8    | 0.1160  |
| 2     | 4.808     | 9648.7    | 0.2727  | 662.4    | 0.3299  |
| 3     | 5.233     | 4441.1    | 0.1255  | 551.1    | 0.2745  |
| 4     | 5.330     | 2335.3    | 0.0660  | 462.4    | 0.2303  |
| 5     | 5.754     | 3519882.2 | 99.4751 | 198862.6 | 99.0493 |

HPLC spectra of product 2w

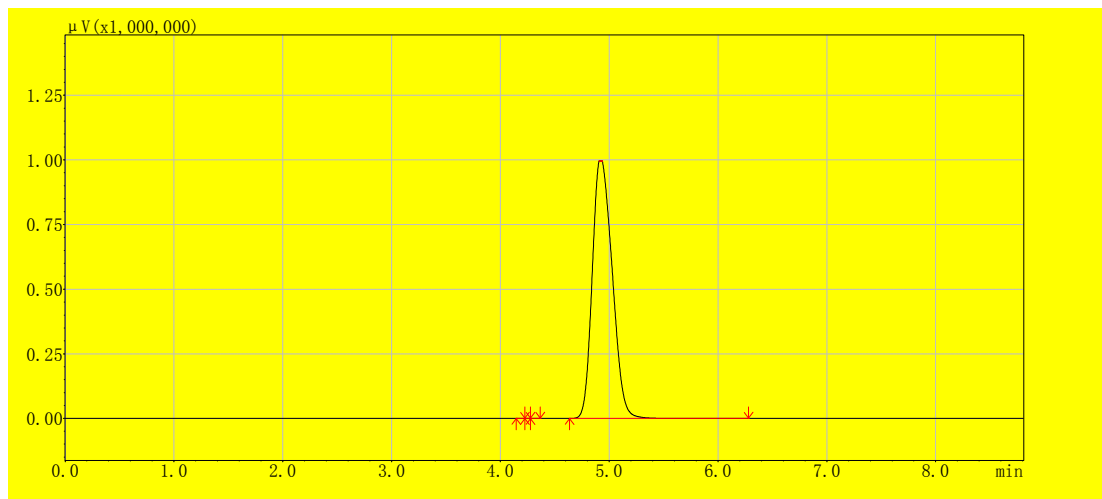

| Peak# | Ret. Time | Area       | Area%   | Height   | Height% |
|-------|-----------|------------|---------|----------|---------|
| 1     | 4.192     | 1962.2     | 0.0154  | 465.3    | 0.0467  |
| 2     | 4.230     | 1065.1     | 0.0084  | 425.3    | 0.0427  |
| 3     | 4.289     | 1238.7     | 0.0097  | 351.1    | 0.0352  |
| 4     | 4.931     | 12728506.7 | 99.9665 | 995570.8 | 99.8754 |

HPLC spectra of product 2x

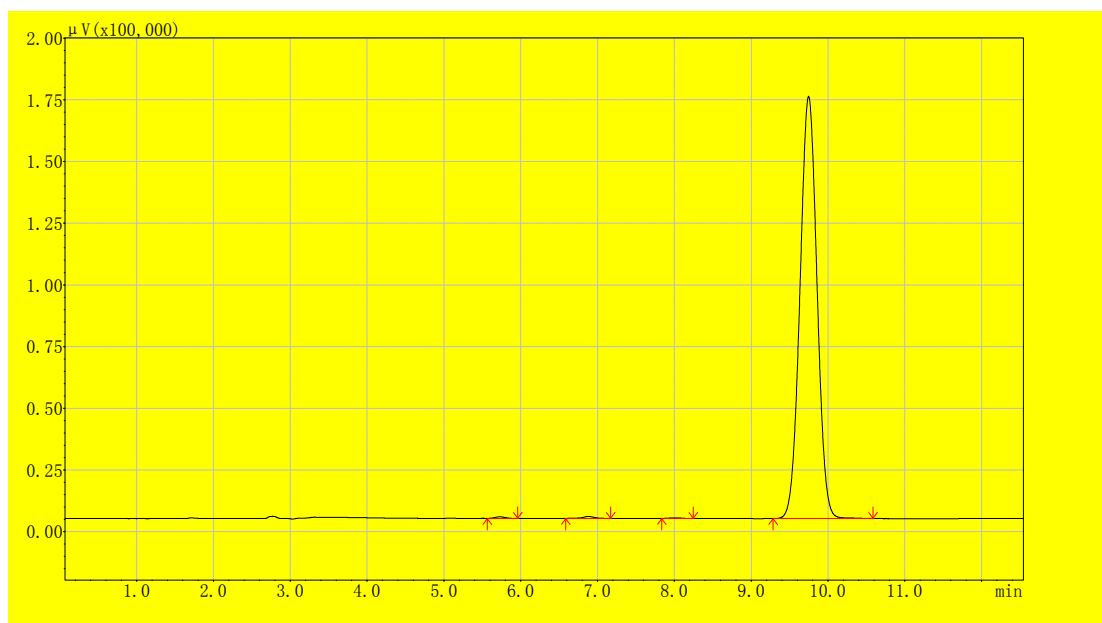

| Peak# | Ret. Time | Area      | Area%   | Height   | Height% |
|-------|-----------|-----------|---------|----------|---------|
| 1     | 5.727     | 6061.2    | 0.2287  | 647.8    | 0.3750  |
| 2     | 6.880     | 8469.4    | 0.3195  | 799.1    | 0.4626  |
| 3     | 8.003     | 2993.9    | 0.1130  | 269.1    | 0.1558  |
| 4     | 9.747     | 2632929.0 | 99.3388 | 171023.0 | 99.0066 |

HPLC spectra of product 2y

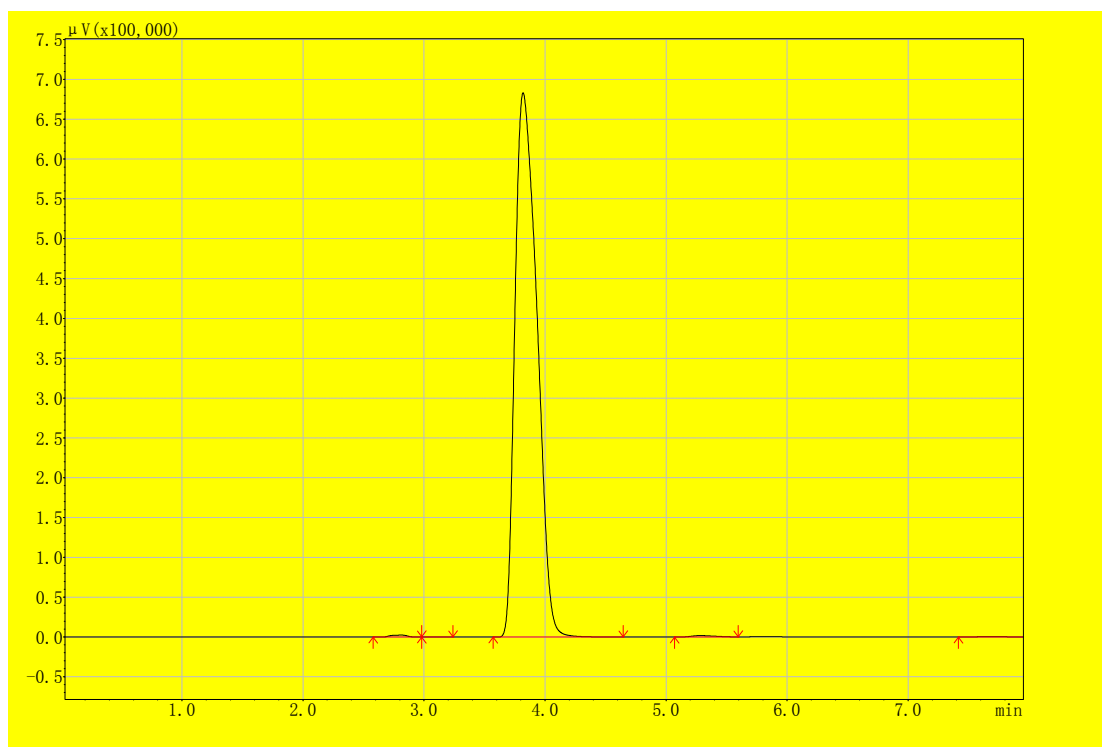

| Peak# | Ret. Time | Area    | Area%  | Height | Height% |
|-------|-----------|---------|--------|--------|---------|
| 1     | 2.813     | 28304.6 | 0.3262 | 2773.3 | 0.4025  |
| 2     | 3.057     | 1226.0  | 0.0141 | 155.1  | 0.0225  |

|   |       |           |         |          |         |
|---|-------|-----------|---------|----------|---------|
| 3 | 3.819 | 8606698.3 | 99.1942 | 683371.8 | 99.1866 |
| 4 | 5.286 | 22738.0   | 0.2621  | 1766.1   | 0.2563  |
| 5 | 7.672 | 17644.2   | 0.2034  | 910.0    | 0.1321  |

HPLC spectra of product **2t'**

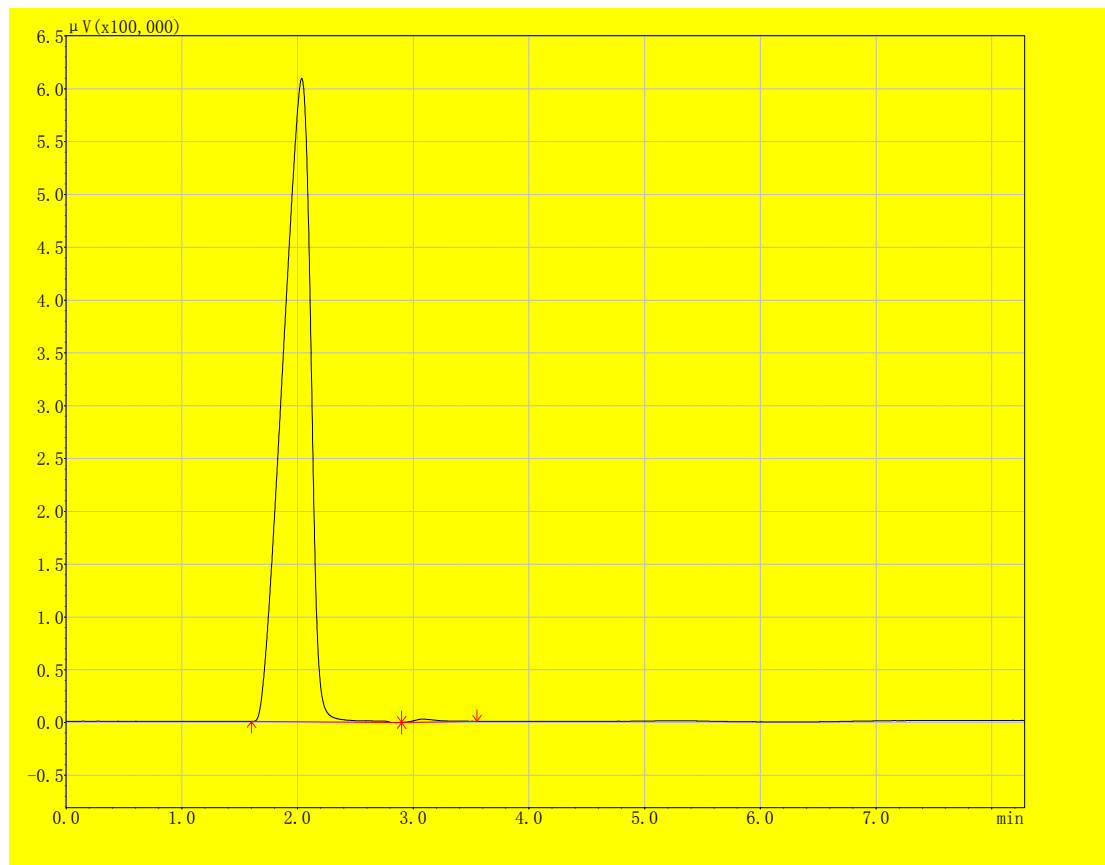

| Peak# | Ret. Time | Area       | Area%   | Height   | Height% |
|-------|-----------|------------|---------|----------|---------|
| 1     | 2.026     | 10089000.0 | 99.5392 | 600936.7 | 99.5088 |
| 2     | 3.090     | 46708.4    | 0.4608  | 2966.2   | 0.4912  |
